# Supplementary material for: Heterogeneity and Cancer-Related Features in Lymphangioleiomyomatosis Cells and Tissue
Source: Oxford University Press journal article supplement (doi:10.1158/1541-7786.mcr-21-0220), 2021-07-26
Supplement: 15417786mcr210220-sup-262900_2_supp_7247437_qw4nrd.xlsx [file 15417786mcr210220-sup-262900_2_supp_7247437_qw4nrd.xlsx]

## Sheet: 2A
Table S2A. Differentially expressed LAMp genes between non-LAM and LAM cells (FDR < 5%; Guo dataset).
LAMp	Average log-fold change (non-LAM vs LAM)	non-LAM cells (%)	LAM cells (%)	P value	FDR-adjusted P value
ACTA2	-3.85117	0.102	0.902	1.25207e-236	3.61659e-232
CTSK	-3.21809	0.054	0.774	5.12922e-306	1.48157e-301
PMEL	-2.04135	0.008	0.436	0	0
MMP2	-1.50397	0.015	0.346	1.68641e-194	4.8712e-190
GAPDH	-1.14837	0.915	0.94	5.76518e-43	1.66527e-38
CD63	-0.655366	0.911	0.872	9.44925e-19	2.72942e-14
NR2F2	-0.620005	0.041	0.263	3.4816e-38	1.00566e-33
IGFBP4	-0.44839	0.136	0.286	8.57636e-08	0.00247728
ESR1	-0.403003	0.021	0.211	3.1056e-52	8.97051e-48
PDPN	-0.334326	0.019	0.12	2.13826e-17	6.17636e-13
SDC2	-0.333172	0.159	0.226	0.0127547	1
MMP14	-0.302913	0.124	0.188	0.00624608	1
IGFBP5	-0.265034	0.039	0.165	2.07409e-13	5.99101e-09
IGFBP6	-0.262013	0.032	0.135	1.39926e-11	4.04176e-07
LGALS3	0.359152	0.829	0.684	0.000193113	1
CXCR4	0.602093	0.353	0.083	5.69857e-10	1.64603e-05
TNFSF10	0.646677	0.289	0.09	1.05979e-06	0.0306121
ALDH1A1	0.708282	0.495	0.045	1.87485e-22	5.4155e-18
ID1	0.917678	0.234	0.06	1.47425e-06	0.0425837
CD44	0.945296	0.726	0.188	4.19561e-31	1.2119e-26
S100A4	0.969008	0.855	0.624	1.50489e-17	4.34688e-13

## Sheet: 2B
Table S2B. Differential gene expression between LAM cells with low and high LAMcore values (all genes considered).
Gene name	P value	Log-fold change	Expresion in low LAMcore cells (%)	Expresion in high LAMcore cells (%)	FDR-adjusted P value
MALAT1	1.01141e-20	-2.75856	0.976	1	2.92145e-16	Non-coding
NEAT1	6.30763e-24	-2.63025	0.129	0.979	1.82196e-19	Non-coding
LUM	3.96295e-13	-1.85784	0.106	0.75	1.1447e-08
MMP2	4.26106e-17	-1.70715	0.071	0.833	1.23081e-12
MMP11	3.04418e-09	-1.69782	0.024	0.438	8.7931e-05
COL6A3	7.72523e-23	-1.62979	0.012	0.875	2.23143e-18
COL3A1	1.04628e-18	-1.56904	0.024	0.771	3.02218e-14
JUNB	1.599e-16	-1.52112	0.071	0.792	4.61872e-12
C11orf96	1.39913e-18	-1.46504	0.047	0.833	4.0414e-14
PLAT	3.45737e-13	-1.43349	0.035	0.625	9.98662e-09
GDF15	3.3642e-10	-1.42874	0.012	0.438	9.71749e-06
ZFP36	3.24016e-12	-1.41002	0.106	0.729	9.35919e-08
AKAP13	9.98311e-21	-1.39233	0.024	0.812	2.88362e-16
ZFP36L1	2.72036e-16	-1.39139	0.141	0.896	7.85776e-12
EGR1	6.21413e-15	-1.37074	0.035	0.667	1.79495e-10
FOS	9.48574e-15	-1.35446	0.106	0.854	2.73996e-10
CYR61	2.02021e-10	-1.31463	0.035	0.521	5.83536e-06
VMP1	1.26827e-18	-1.29505	0.059	0.854	3.6634e-14
PNISR	2.60608e-21	-1.29353	0.047	0.896	7.52765e-17
DST	1.19363e-19	-1.29282	0.024	0.792	3.44781e-15
ARID5B	1.18664e-16	-1.28029	0.094	0.875	3.42762e-12
PMEL	3.84766e-10	-1.25969	0.224	0.812	1.1114e-05
DUSP1	1.21431e-13	-1.24358	0.141	0.854	3.50753e-09
COL1A1	1.94569e-14	-1.24134	0.047	0.708	5.62014e-10
JUN	3.97621e-14	-1.24099	0.106	0.812	1.14853e-09
GADD45A	1.39536e-16	-1.22793	0.047	0.771	4.0305e-12
PRUNE2	2.05203e-14	-1.18959	0	0.562	5.92728e-10
KLF6	3.4623e-19	-1.18802	0.035	0.812	1.00009e-14
TCF21	4.44601e-15	-1.17223	0.035	0.688	1.28423e-10
XIST	1.75091e-18	-1.16728	0.082	0.875	5.05752e-14
KCNQ1OT1	1.97763e-17	-1.15164	0.012	0.708	5.71239e-13
MT-ND1	7.02744e-14	-1.14064	0.624	1	2.02988e-09
GPNMB	1.81468e-13	-1.12927	0.224	0.979	5.24171e-09
MT-ATP6	9.97453e-14	-1.1236	0.576	1	2.88114e-09
PBX1	4.00393e-19	-1.11577	0.024	0.792	1.15654e-14
TIMP2	1.71735e-18	-1.11409	0.082	0.896	4.96055e-14
GADD45B	2.60657e-11	-1.10298	0.024	0.521	7.52908e-07
FLNA	1.73599e-12	-1.10058	0.082	0.688	5.0144e-08
APP	7.15976e-15	-1.07111	0.082	0.812	2.0681e-10
ATP1B1	1.07303e-13	-1.06968	0.047	0.688	3.09946e-09
COL1A2	8.08832e-15	-1.06529	0.106	0.875	2.33631e-10
MT-ND4	9.7029e-13	-1.04935	0.682	1	2.80268e-08
AKAP12	1.5208e-16	-1.04251	0.024	0.708	4.39284e-12
BGN	7.72246e-10	-1.03141	0.035	0.5	2.23063e-05
LIMA1	8.15414e-14	-1.02095	0.024	0.604	2.35532e-09
CCL2	0.0014209	-1.01974	0.047	0.229	1
SYNPO2	2.76774e-11	-1.0189	0.047	0.562	7.99461e-07
MT-CYB	6.78304e-13	-1.01486	0.6	1	1.95928e-08
AEBP1	6.79027e-16	-0.988347	0.071	0.833	1.96137e-11
TACC1	7.2385e-16	-0.986064	0.059	0.771	2.09084e-11
IER2	8.35749e-11	-0.984324	0.047	0.562	2.41406e-06
USP53	1.05099e-12	-0.979533	0	0.5	3.03578e-08
CALD1	7.51044e-10	-0.974751	0.424	1	2.16939e-05
MT-ND2	1.27696e-11	-0.97042	0.706	1	3.6885e-07
LMNA	3.05645e-17	-0.954575	0.106	0.938	8.82855e-13
SMPDL3A	3.78852e-13	-0.930647	0.035	0.625	1.09431e-08
HTRA1	3.37158e-12	-0.927772	0.094	0.75	9.73881e-08
PCSK7	4.2437e-10	-0.92735	0.012	0.438	1.22579e-05
FAM178A	1.32305e-11	-0.927307	0	0.458	3.82164e-07
IGFN1	1.55334e-10	-0.926426	0	0.417	4.48682e-06
CTGF	1.55334e-10	-0.919019	0	0.417	4.48682e-06
MT2A	0.000188392	-0.914568	0.259	0.646	1
VCAN	1.55334e-10	-0.904201	0	0.417	4.48682e-06
CPEB4	2.02215e-11	-0.902687	0.012	0.479	5.84099e-07
CTNNB1	5.86714e-09	-0.901618	0.047	0.479	0.000169472
SPARCL1	6.30948e-11	-0.8997	0.176	0.854	1.82249e-06
DAPL1	3.88037e-07	-0.88999	0.035	0.375	0.0112085
NBL1	1.60227e-10	-0.889916	0.271	0.979	4.62816e-06
ACTN1	5.61288e-13	-0.888034	0.118	0.812	1.62128e-08
MFAP4	2.65814e-10	-0.886213	0.118	0.708	7.67803e-06
IER3	1.92377e-13	-0.885622	0.024	0.604	5.55682e-09
RBM39	3.02263e-15	-0.882732	0.059	0.75	8.73087e-11
OSBPL8	4.68564e-13	-0.882278	0.071	0.688	1.35345e-08
HSPA1A	0.000612905	-0.870943	0.035	0.229	1
NOVA1	3.40388e-12	-0.869029	0.012	0.521	9.83212e-08
VGLL4	5.59167e-15	-0.867166	0.047	0.708	1.61515e-10
MT-ND5	5.78997e-10	-0.864767	0.306	1	1.67243e-05
ATF3	3.64059e-10	-0.85645	0.024	0.479	1.05158e-05
CYP1B1	1.25535e-15	-0.855197	0.071	0.812	3.62608e-11
TPM4	1.89725e-12	-0.854298	0.106	0.771	5.48021e-08
SPON2	5.91294e-12	-0.851304	0.212	0.958	1.70795e-07
MT-CO3	2.0729e-11	-0.848333	0.788	1	5.98757e-07
MT-CO2	1.8377e-10	-0.838651	0.694	1	5.30819e-06
MDK	4.22272e-12	-0.83247	0.165	0.896	1.21973e-07
SON	6.88332e-19	-0.832376	0.071	0.917	1.98825e-14
SOX4	5.33332e-11	-0.830152	0.141	0.792	1.54053e-06
COL6A2	2.25939e-15	-0.829	0.059	0.792	6.52625e-11
CSNK1A1	2.09159e-15	-0.820616	0.059	0.75	6.04156e-11
IGFBP7	5.14919e-06	-0.820569	0.106	0.479	0.148734
DCN	3.21916e-08	-0.818887	0.376	0.979	0.000929855
CCDC80	9.68469e-13	-0.804952	0.024	0.583	2.79742e-08
ITGA8	1.12747e-11	-0.797357	0.035	0.562	3.2567e-07
CTSB	4.5451e-09	-0.797205	0.2	0.812	0.000131285
MIR145	5.18974e-10	-0.793709	0	0.396	1.49906e-05
SAT1	1.70101e-08	-0.791753	0.365	0.979	0.000491338
ACP5	1.16496e-10	-0.790631	0.176	0.875	3.36498e-06
TTC3	2.05225e-13	-0.78764	0.082	0.75	5.92793e-09
C10orf10	1.07705e-06	-0.784453	0.141	0.583	0.0311105
ESR1	2.882e-13	-0.781866	0.012	0.562	8.32466e-09
THBS1	3.11066e-08	-0.779148	0.012	0.354	0.000898513
MT-CO1	5.58387e-10	-0.777095	0.765	1	1.6129e-05
KCNC2	2.34983e-07	-0.775816	0.082	0.5	0.00678748
FBLN1	7.77562e-11	-0.775616	0.212	0.917	2.24599e-06
FRZB	1.30925e-07	-0.772355	0.012	0.333	0.00378178
VCL	2.3884e-13	-0.7717	0.035	0.646	6.89889e-09
RAMP1	4.93412e-08	-0.771228	0.247	0.812	0.00142522
LDLR	2.88316e-13	-0.769942	0	0.521	8.328e-09
MYH11	4.83596e-09	-0.763093	0.188	0.771	0.000139687
CCND2	1.05099e-12	-0.757641	0	0.5	3.03578e-08
CHODL	1.70511e-07	-0.757165	0	0.292	0.00492522
AKAP9	3.06347e-14	-0.756974	0.024	0.625	8.84883e-10
PHACTR2	4.12258e-11	-0.753855	0.012	0.479	1.19081e-06
GTF2I	4.91734e-15	-0.743944	0.071	0.792	1.42037e-10
DDX17	5.45458e-14	-0.743441	0.047	0.688	1.57556e-09
TCF4	5.60435e-11	-0.743294	0.024	0.5	1.61882e-06
SOCS3	5.47662e-08	-0.742527	0.035	0.417	0.00158192
FAM133B	3.30237e-10	-0.733631	0.035	0.5	9.5389e-06
IRS2	2.05203e-14	-0.729434	0	0.562	5.92728e-10
HTR2B	1.6664e-13	-0.727658	0.071	0.75	4.8134e-09
ERLEC1	1.30319e-10	-0.727611	0.024	0.479	3.76426e-06
MIR143HG	1.01459e-12	-0.72728	0.024	0.583	2.93064e-08
MGP	0.0708934	-0.72539	0.635	0.854	1
PRRC2C	4.94142e-11	-0.719378	0.035	0.542	1.42733e-06
AC131025.8	5.18974e-10	-0.718856	0	0.396	1.49906e-05
CCNL1	5.73184e-15	-0.711312	0.024	0.646	1.65564e-10
MAF	3.76228e-12	-0.708734	0	0.479	1.08673e-07
RSPO3	3.26236e-09	-0.70578	0.035	0.479	9.42333e-05
LAPTM4B	7.61082e-14	-0.705773	0.024	0.625	2.19839e-09
MCOLN3	1.55334e-10	-0.70211	0	0.417	4.48682e-06
DDX5	4.63906e-11	-0.70207	0.224	0.917	1.33999e-06
CELF1	6.11181e-12	-0.701189	0.012	0.5	1.7654e-07
AHNAK2	3.76228e-12	-0.698471	0	0.479	1.08673e-07
RNH1	3.53388e-14	-0.697901	0.082	0.771	1.02076e-09
TUFM	1.09222e-13	-0.695099	0.059	0.708	3.15489e-09
COL4A2	1.07392e-12	-0.693769	0.024	0.562	3.10202e-08
SRSF5	3.7674e-10	-0.693543	0.176	0.833	1.08821e-05
RPS6KA5	5.50921e-10	-0.691667	0.035	0.5	1.59134e-05
C2orf88	1.75764e-08	-0.68996	0	0.333	0.000507693
SLC38A2	1.19691e-11	-0.689503	0.024	0.521	3.45728e-07
IGFBP2	5.55192e-08	-0.683012	0.012	0.354	0.00160367
KANK2	1.38549e-11	-0.682098	0.082	0.667	4.002e-07
MT-ND3	2.00819e-08	-0.681515	0.659	1	0.000580067
DNAJB1	4.14511e-07	-0.681331	0.012	0.312	0.0119732
FOXP1	2.92474e-11	-0.680928	0.059	0.625	8.44811e-07
FOSB	5.19853e-07	-0.678669	0	0.271	0.015016
SLC40A1	4.3513e-13	-0.665119	0.118	0.854	1.25687e-08
TLN1	2.28657e-13	-0.665062	0.035	0.625	6.60476e-09
FCGRT	8.45669e-12	-0.663144	0.176	0.917	2.44272e-07
CAPNS1	5.43326e-11	-0.662258	0.059	0.583	1.5694e-06
NCOR1	1.50045e-12	-0.661339	0.047	0.625	4.33405e-08
GOLGB1	6.57968e-11	-0.661139	0.012	0.458	1.90054e-06
CEBPB	1.15955e-10	-0.657316	0.129	0.771	3.34936e-06
ARID5A	1.5087e-07	-0.653377	0.082	0.5	0.00435788
RERE	4.57226e-11	-0.653361	0	0.438	1.3207e-06
MMP14	7.28932e-09	-0.652681	0.035	0.458	0.000210552
RGS3	2.81591e-07	-0.652045	0.024	0.354	0.00813376
TCF25	4.27545e-12	-0.646318	0.047	0.625	1.23496e-07
MAN1A2	7.23421e-11	-0.643381	0.012	0.458	2.0896e-06
DAAM1	6.41304e-11	-0.640691	0.035	0.542	1.85241e-06
F10	3.95246e-05	-0.638414	0	0.188	1
HHATL	3.05191e-07	-0.638124	0.012	0.312	0.00881545
SRRM2	1.4556e-14	-0.63772	0.071	0.75	4.2045e-10
BTG1	7.21105e-14	-0.6332	0.118	0.875	2.08291e-09
SFRP4	4.28417e-11	-0.630877	0.024	0.521	1.23748e-06
MFAP2	1.60694e-10	-0.628097	0.012	0.458	4.64165e-06
MAT2A	1.39728e-10	-0.626756	0.012	0.458	4.03605e-06
PIM1	5.51824e-09	-0.625814	0	0.354	0.000159394
TMEM98	4.61e-14	-0.624638	0.047	0.708	1.3316e-09
EPN2	3.91562e-11	-0.622711	0.024	0.521	1.13103e-06
FABP7	0.0347313	-0.619648	0.118	0.271	1
C19orf60	1.63747e-12	-0.617795	0.024	0.562	4.72984e-08
BTG2	7.19106e-10	-0.616951	0.047	0.542	2.07714e-05
ZBTB20	8.77248e-10	-0.613782	0.012	0.417	2.53393e-05
NR2F2	6.52455e-14	-0.61241	0.035	0.667	1.88462e-09
COL14A1	5.62752e-09	-0.611214	0.012	0.396	0.000162551
FBLIM1	3.59962e-12	-0.607755	0.024	0.562	1.03975e-07
ZFP36L2	3.21932e-12	-0.607351	0.082	0.708	9.29901e-08
CTDNEP1	7.63077e-10	-0.607256	0.012	0.417	2.20415e-05
PPFIBP1	1.75764e-08	-0.606396	0	0.333	0.000507693
CHD9	1.73192e-11	-0.603905	0.047	0.583	5.00264e-07
RHOB	1.25723e-10	-0.600443	0.094	0.688	3.6315e-06
OGN	6.03489e-07	-0.598602	0.259	0.812	0.0174318
FAM50A	7.602e-12	-0.596405	0.047	0.604	2.19584e-07
CPNE3	4.26872e-10	-0.595501	0.035	0.5	1.23302e-05
NFE2L2	7.77756e-10	-0.594476	0.059	0.542	2.24655e-05
TAF7	4.33515e-11	-0.593842	0.035	0.542	1.25221e-06
C1R	4.74766e-11	-0.593172	0.012	0.479	1.37136e-06
MBP	2.58669e-13	-0.593028	0.071	0.729	7.47164e-09
MEIS2	6.93197e-14	-0.591751	0.071	0.771	2.0023e-09
TERF2IP	1.57495e-11	-0.588852	0.047	0.604	4.54924e-07
AHNAK	2.77077e-11	-0.587393	0.047	0.583	8.00338e-07
ROCK2	1.30155e-08	-0.585193	0.012	0.375	0.000375952
DAPK3	5.51824e-09	-0.584098	0	0.354	0.000159394
NFIA	1.93405e-08	-0.583592	0.106	0.625	0.00055865
MATN2	6.80364e-12	-0.580769	0.082	0.729	1.96523e-07
DNAJC19	6.99291e-11	-0.578045	0.035	0.542	2.0199e-06
DDR2	9.93286e-10	-0.577475	0.024	0.458	2.86911e-05
H3F3B	3.59611e-06	-0.576917	0.4	0.979	0.103874
HP1BP3	2.80717e-10	-0.575125	0.047	0.542	8.1085e-06
IP6K2	7.35056e-11	-0.574922	0.024	0.5	2.12321e-06
SNX9	3.74678e-12	-0.573575	0.012	0.521	1.08226e-07
WSB1	5.70925e-12	-0.573284	0.082	0.688	1.64912e-07
ZNF503	1.70582e-09	-0.573158	0	0.375	4.92725e-05
RTN4	2.02511e-10	-0.571896	0.188	0.896	5.84952e-06
SET	1.06613e-09	-0.571379	0.118	0.708	3.07953e-05
NR4A1	1.43795e-10	-0.571367	0.024	0.5	4.15351e-06
CLSTN1	6.13927e-07	-0.570754	0.059	0.417	0.0177333
AAK1	3.28634e-11	-0.569951	0.047	0.562	9.49258e-07
RAB2A	4.34867e-11	-0.569807	0.129	0.771	1.25611e-06
MOXD1	1.70511e-07	-0.568626	0	0.292	0.00492522
MAFF	5.51824e-09	-0.568566	0	0.354	0.000159394
KHDRBS1	8.72143e-13	-0.568021	0.047	0.646	2.51919e-08
TRIM47	5.51456e-08	-0.567609	0	0.312	0.00159288
KLF9	1.70582e-09	-0.567222	0	0.375	4.92725e-05
WIPI2	3.64059e-10	-0.567065	0.024	0.479	1.05158e-05
RRBP1	4.3563e-12	-0.566937	0.024	0.542	1.25832e-07
ECM1	3.95246e-05	-0.566133	0	0.188	1
EMP2	2.18836e-11	-0.564801	0.082	0.708	6.32108e-07
TNRC6B	7.40777e-09	-0.564177	0.024	0.417	0.000213974
JMJD1C	2.23416e-10	-0.560548	0.024	0.479	6.45336e-06
HIST1H4C	2.28852e-10	-0.560354	0.094	0.688	6.61039e-06
PNRC1	6.57839e-10	-0.559175	0.235	0.938	1.90017e-05
BCLAF1	7.61082e-14	-0.558325	0.024	0.625	2.19839e-09
PDE5A	1.62925e-08	-0.557838	0.012	0.375	0.000470609
RNF145	6.66534e-13	-0.557202	0.024	0.583	1.92528e-08
ST5	1.57755e-11	-0.556591	0.024	0.521	4.55675e-07
OSR2	1.3623e-05	-0.554697	0	0.208	0.3935
NR2F1	5.34627e-10	-0.55397	0.012	0.438	1.54427e-05
RIC3	1.55334e-10	-0.553877	0	0.417	4.48682e-06
CD81	3.42935e-11	-0.552595	0.082	0.688	9.90568e-07
MARCKSL1	5.62752e-09	-0.550647	0.012	0.396	0.000162551
LDB2	4.34192e-10	-0.549939	0.024	0.479	1.25416e-05
FNIP2	1.08903e-08	-0.54811	0.024	0.417	0.000314567
CTTN	1.31565e-10	-0.547839	0.024	0.5	3.80025e-06
OAF	1.75764e-08	-0.543187	0	0.333	0.000507693
PALLD	5.67404e-09	-0.542513	0.247	0.917	0.000163895
FBXO32	3.74276e-08	-0.53883	0.235	0.875	0.00108109
PSAP	6.86314e-06	-0.537281	0.365	0.979	0.198242
SF1	3.2917e-10	-0.536696	0.071	0.604	9.50806e-06
PGM5-AS1	9.86518e-05	-0.536295	0.082	0.375	1
ITM2B	3.09891e-05	-0.535803	0.494	0.979	0.895119
SYNE2	4.74766e-11	-0.534836	0.012	0.479	1.37136e-06
DDIT4	0.000207341	-0.53456	0.118	0.417	1
PELO	6.17114e-08	-0.533971	0.035	0.417	0.00178253
CAMK1D	4.28832e-09	-0.531323	0.012	0.396	0.000123868
KLF10	1.36149e-08	-0.531308	0.012	0.375	0.000393267
TSC22D1	4.46889e-12	-0.530907	0.141	0.875	1.29084e-07
DYNC1H1	2.82333e-11	-0.529423	0.012	0.479	8.15519e-07
TMEM60	4.8864e-09	-0.528627	0.024	0.438	0.000141144
NHLRC3	1.37832e-11	-0.528578	0.012	0.5	3.98128e-07
BNIP3L	4.27716e-12	-0.528247	0.082	0.708	1.23546e-07
CPE	2.15904e-10	-0.526803	0.082	0.646	6.23639e-06
TNS1	1.70582e-09	-0.525096	0	0.375	4.92725e-05
SH3PXD2B	3.26236e-09	-0.524799	0.035	0.479	9.42333e-05
SLC35B2	5.18974e-10	-0.524591	0	0.396	1.49906e-05
ATP2B1	2.97382e-08	-0.524571	0.012	0.354	0.000858989
SCAF11	1.85258e-10	-0.524075	0.047	0.542	5.35118e-06
GPR124	5.51824e-09	-0.524053	0	0.354	0.000159394
EPS8	5.37905e-09	-0.52301	0.012	0.396	0.000155374
ID2	1.5548e-05	-0.522684	0.259	0.75	0.449104
ZSCAN18	2.97556e-09	-0.521211	0.012	0.396	8.59491e-05
ABI3BP	1.70511e-07	-0.519904	0	0.292	0.00492522
C16orf45	1.25336e-11	-0.516882	0.024	0.542	3.62033e-07
RAB27A	8.77248e-10	-0.51673	0.012	0.417	2.53393e-05
PRDM1	4.64334e-06	-0.514833	0	0.229	0.134123
ZC3H13	5.49186e-12	-0.514425	0.024	0.542	1.58632e-07
ZFAND5	9.0278e-13	-0.514346	0.118	0.812	2.60768e-08
ENAH	4.28417e-11	-0.513696	0.024	0.521	1.23748e-06
PLXDC2	1.15743e-07	-0.512911	0.024	0.375	0.00334324
CBX6	5.74763e-10	-0.51277	0.035	0.5	1.6602e-05
XRN2	2.05398e-08	-0.511916	0.035	0.438	0.000593292
COPS6	1.36413e-11	-0.511642	0.094	0.729	3.94028e-07
PHF20L1	5.18974e-10	-0.511593	0	0.396	1.49906e-05
CLIP1	1.55334e-10	-0.511434	0	0.417	4.48682e-06
HADHA	2.21058e-11	-0.510775	0.047	0.604	6.38526e-07
THBS2	5.18974e-10	-0.510441	0	0.396	1.49906e-05
IRF2BP2	1.70774e-10	-0.510043	0.024	0.479	4.93281e-06
COL5A2	1.56367e-06	-0.509578	0	0.25	0.0451666
MAN1C1	5.18974e-10	-0.507864	0	0.396	1.49906e-05
WASF2	4.78345e-09	-0.507618	0.059	0.521	0.00013817
RBP1	2.9054e-05	-0.507072	0.012	0.229	0.839224
MEG3	0.00011353	-0.506897	0	0.167	1
CNN3	1.28745e-07	-0.506588	0.247	0.896	0.00371879
RER1	1.08659e-12	-0.506481	0.047	0.646	3.1386e-08
CD97	1.52893e-08	-0.506254	0.059	0.5	0.000441631
MT-ND6	1.57259e-11	-0.506208	0.059	0.625	4.54241e-07
ITSN2	1.52497e-09	-0.505254	0.012	0.417	4.40487e-05
FAM120A	5.18974e-10	-0.504353	0	0.396	1.49906e-05
RBMS1	5.50921e-10	-0.504024	0.035	0.5	1.59134e-05
NFIC	1.6774e-13	-0.502436	0.047	0.688	4.84517e-09
AFF4	1.23716e-08	-0.500346	0.024	0.417	0.000357354
SRSF10	1.55334e-10	-0.500115	0	0.417	4.48682e-06
ACTN4	1.34105e-10	-0.500007	0.071	0.625	3.87361e-06
SAT2	9.5606e-13	-0.499776	0.082	0.75	2.76158e-08
TSHZ2	4.64334e-06	-0.499201	0	0.229	0.134123
SMC3	2.30038e-08	-0.498536	0.024	0.396	0.000664465
TM9SF2	1.0767e-07	-0.498286	0.047	0.438	0.00311005
SERPINF1	1.6723e-06	-0.497786	0.365	0.979	0.0483045
STAT3	3.43778e-12	-0.49774	0.024	0.562	9.93002e-08
SPARC	9.5552e-12	-0.497732	0.129	0.854	2.76002e-07
GEM	1.43734e-08	-0.49578	0.059	0.521	0.000415174
TOP1	4.85041e-10	-0.492848	0.035	0.5	1.40104e-05
YPEL2	1.70511e-07	-0.492244	0	0.292	0.00492522
C7	5.19853e-07	-0.490912	0	0.271	0.015016
C19orf10	1.40992e-12	-0.489845	0.071	0.708	4.07255e-08
NFKBIA	1.02606e-10	-0.489321	0.106	0.729	2.96378e-06
APH1A	1.61087e-08	-0.489136	0.035	0.438	0.0004653
PRSS23	8.93254e-05	-0.488463	0.035	0.271	1
NEU1	4.85813e-08	-0.486642	0.035	0.417	0.00140327
YPEL3	9.52377e-10	-0.485633	0.035	0.5	2.75094e-05
YTHDC1	4.57226e-11	-0.485432	0	0.438	1.3207e-06
VIMP	9.37149e-13	-0.484039	0.035	0.604	2.70696e-08
DHX36	8.17827e-10	-0.483129	0.047	0.521	2.36229e-05
SRPK2	2.71424e-09	-0.481911	0.012	0.396	7.84009e-05
KXD1	4.3563e-12	-0.480671	0.024	0.542	1.25832e-07
ARHGAP24	5.51824e-09	-0.480542	0	0.354	0.000159394
MUM1	5.19853e-07	-0.480209	0	0.271	0.015016
COX11	3.9436e-09	-0.480186	0.024	0.438	0.000113911
GOPC	5.34627e-10	-0.479911	0.012	0.438	1.54427e-05
KRCC1	7.09548e-09	-0.479062	0.024	0.417	0.000204953
RUFY3	1.75764e-08	-0.47893	0	0.333	0.000507693
PRRC2B	1.70582e-09	-0.478767	0	0.375	4.92725e-05
KLF2	1.53302e-06	-0.478551	0.012	0.292	0.0442813
YY1	3.9307e-12	-0.478366	0.012	0.521	1.13538e-07
SEMA5A	0.000914838	-0.478221	0	0.125	1
MT1M	0.00525909	-0.477836	0.012	0.125	1
ECHDC2	5.18974e-10	-0.477579	0	0.396	1.49906e-05
LPP	2.85281e-09	-0.476785	0.141	0.729	8.24033e-05
COPE	8.38083e-09	-0.476707	0.153	0.75	0.00024208
RABGAP1	1.74894e-09	-0.475052	0.012	0.417	5.05181e-05
C9orf16	6.90931e-09	-0.474633	0.153	0.75	0.000199575
SNTB2	1.75764e-08	-0.473843	0	0.333	0.000507693
KIDINS220	1.55334e-10	-0.473112	0	0.417	4.48682e-06
CGGBP1	1.70582e-09	-0.473025	0	0.375	4.92725e-05
ARL6IP5	1.75585e-08	-0.471767	0.094	0.604	0.000507177
CXXC5	5.51824e-09	-0.471697	0	0.354	0.000159394
SOCS2	1.30964e-07	-0.471419	0.024	0.375	0.00378289
ATRX	1.66535e-12	-0.469785	0.071	0.708	4.81035e-08
ARPP19	2.37903e-09	-0.467807	0.106	0.688	6.87182e-05
CLN8	2.97382e-08	-0.466046	0.012	0.354	0.000858989
TPR	2.50087e-10	-0.466031	0.035	0.521	7.22376e-06
FAM60A	9.53533e-12	-0.465677	0.035	0.583	2.75428e-07
IGF2BP2	3.8159e-08	-0.464772	0.024	0.396	0.00110222
NFIB	5.51456e-08	-0.4644	0	0.312	0.00159288
NFAT5	5.51824e-09	-0.464372	0	0.354	0.000159394
N4BP2L2	5.1703e-12	-0.464319	0.118	0.812	1.49344e-07
PPP1R12A	1.91462e-11	-0.463695	0.035	0.562	5.53039e-07
SPOP	1.74894e-09	-0.462237	0.012	0.417	5.05181e-05
MAGEF1	5.34627e-10	-0.461503	0.012	0.438	1.54427e-05
PNN	3.8159e-08	-0.46045	0.024	0.396	0.00110222
NCOA7	3.40288e-08	-0.460411	0.012	0.354	0.000982922
UBR4	5.51456e-08	-0.460292	0	0.312	0.00159288
ERRFI1	2.07265e-06	-0.459606	0.059	0.417	0.0598686
CDK11A	1.75764e-08	-0.458735	0	0.333	0.000507693
UBE3A	2.44259e-10	-0.458285	0.024	0.479	7.05542e-06
JUND	5.83668e-11	-0.457588	0.071	0.646	1.68592e-06
SF3B1	4.28417e-11	-0.45571	0.024	0.521	1.23748e-06
SRSF7	8.67956e-11	-0.455503	0.118	0.771	2.50709e-06
DPP7	3.60392e-08	-0.454495	0.106	0.604	0.00104099
ZNF462	5.51456e-08	-0.454065	0	0.312	0.00159288
CCDC50	3.11525e-09	-0.45381	0.012	0.396	8.9984e-05
ASPN	2.5397e-06	-0.452478	0.035	0.354	0.0733593
IQGAP1	1.34105e-10	-0.452299	0.071	0.625	3.87361e-06
LEPROT	2.27568e-13	-0.451891	0.071	0.729	6.57331e-09
ZKSCAN1	1.85883e-08	-0.451066	0.024	0.396	0.000536923
SLMAP	6.15698e-07	-0.451026	0.118	0.583	0.0177844
TRIB1	2.0485e-06	-0.450845	0.024	0.312	0.0591709
UBXN4	2.55927e-14	-0.450762	0.071	0.771	7.39245e-10
PRPF31	1.70582e-09	-0.450634	0	0.375	4.92725e-05
MLANA	0.00011353	-0.45031	0	0.167	1
APPL2	1.53531e-09	-0.449864	0.024	0.458	4.43476e-05
MAP2K2	6.50885e-09	-0.449691	0.024	0.417	0.000188008
BAZ2B	5.51824e-09	-0.449573	0	0.354	0.000159394
MTUS1	1.00399e-07	-0.448934	0.012	0.333	0.00290002
RAB5C	1.69428e-09	-0.448888	0.047	0.521	4.89392e-05
PPP1CB	2.35797e-08	-0.448158	0.153	0.729	0.000681099
NDUFA8	7.39678e-10	-0.447772	0.071	0.604	2.13656e-05
C20orf24	4.67299e-08	-0.447569	0.071	0.521	0.00134979
ZNF638	1.74894e-09	-0.447376	0.012	0.417	5.05181e-05
ZEB2	1.3721e-10	-0.446785	0.035	0.521	3.96332e-06
LITAF	3.02734e-08	-0.446512	0.153	0.729	0.000874447
C9orf78	3.06788e-08	-0.446151	0.035	0.438	0.000886157
PDGFRB	1.70511e-07	-0.445487	0	0.292	0.00492522
TTC14	4.14511e-07	-0.445421	0.012	0.312	0.0119732
F3	3.03054e-05	-0.445411	0.035	0.292	0.875372
NDUFA10	8.037e-13	-0.44511	0.024	0.583	2.32149e-08
HOXA11	1.70511e-07	-0.44473	0	0.292	0.00492522
LPIN1	5.19853e-07	-0.444616	0	0.271	0.015016
SMARCE1	1.22307e-09	-0.443169	0.035	0.5	3.53283e-05
FOSL2	3.28135e-06	-0.442946	0.071	0.417	0.0947817
COL4A1	5.51824e-09	-0.441687	0	0.354	0.000159394
AHCYL1	1.70582e-09	-0.440539	0	0.375	4.92725e-05
SFRP1	1.30265e-05	-0.439715	0.012	0.25	0.37627
GOT1	4.72158e-07	-0.439526	0.012	0.312	0.0136383
ECI1	5.18974e-10	-0.438499	0	0.396	1.49906e-05
CTSA	2.0101e-09	-0.43773	0.094	0.625	5.80619e-05
ITPKB	2.40017e-08	-0.437638	0.024	0.396	0.00069329
TFPI	7.69679e-06	-0.437559	0.024	0.292	0.222322
FAP	3.4531e-07	-0.437518	0.024	0.354	0.00997429
SCARB2	1.161e-07	-0.437029	0.047	0.438	0.00335355
HSPA1B	0.000914838	-0.43645	0	0.125	1
HIBADH	6.09949e-10	-0.434583	0.059	0.583	1.76184e-05
MT-ND4L	4.71316e-10	-0.432986	0.094	0.667	1.3614e-05
CAND1	5.51824e-09	-0.432919	0	0.354	0.000159394
DDX46	4.18709e-07	-0.432808	0.094	0.521	0.0120944
MLPH	5.79784e-07	-0.432487	0.141	0.625	0.0167471
CCNG2	1.46896e-06	-0.432344	0.012	0.292	0.0424309
USP8	6.9869e-10	-0.432193	0.024	0.458	2.01817e-05
PLEKHO1	4.74042e-10	-0.4319	0.024	0.479	1.36927e-05
LGALS3BP	7.14794e-11	-0.431358	0.106	0.75	2.06468e-06
GSPT1	1.76355e-09	-0.430822	0.047	0.521	5.09403e-05
FADS1	1.12029e-10	-0.43071	0.047	0.562	3.23595e-06
DDT	1.41324e-11	-0.430609	0.106	0.75	4.08215e-07
M6PR	7.71021e-08	-0.429854	0.059	0.479	0.00222709
OXCT1	5.51824e-09	-0.429575	0	0.354	0.000159394
APEX1	2.17451e-10	-0.429371	0.059	0.583	6.28108e-06
GBP2	4.11442e-10	-0.429029	0.059	0.583	1.18845e-05
NR2F2-AS1	1.70511e-07	-0.428626	0	0.292	0.00492522
MYH9	7.79618e-10	-0.428501	0.047	0.542	2.25193e-05
NAA38	2.43862e-11	-0.428339	0.047	0.583	7.04395e-07
EMX2	5.2347e-07	-0.428252	0.141	0.604	0.0151204
FAIM2	5.19853e-07	-0.427879	0	0.271	0.015016
IFIT3	5.19853e-07	-0.427665	0	0.271	0.015016
HAND2-AS1	4.32542e-08	-0.427662	0.024	0.396	0.0012494
PIK3R3	5.51456e-08	-0.426886	0	0.312	0.00159288
EMILIN1	1.74894e-09	-0.42612	0.012	0.417	5.05181e-05
EIF4H	3.24783e-09	-0.42594	0.059	0.521	9.38137e-05
GOLIM4	5.51456e-08	-0.424314	0	0.312	0.00159288
CRISPLD2	1.56367e-06	-0.423968	0	0.25	0.0451666
TMSB15A	1.3623e-05	-0.423656	0	0.208	0.3935
SSR1	1.78165e-08	-0.423582	0.012	0.375	0.000514631
TMEM179B	3.46615e-09	-0.423475	0.035	0.458	0.00010012
ASAP1	1.56367e-06	-0.423366	0	0.25	0.0451666
PRDM2	1.70582e-09	-0.423102	0	0.375	4.92725e-05
CSNK1E	2.30038e-08	-0.422893	0.024	0.396	0.000664465
CKAP4	1.70511e-07	-0.422658	0	0.292	0.00492522
DDRGK1	3.30118e-10	-0.422638	0.082	0.625	9.53546e-06
FOXO3	4.70111e-08	-0.422032	0.024	0.396	0.00135792
CTSD	0.000615415	-0.421619	0.412	0.938	1
FAM214A	5.11482e-05	-0.421519	0.024	0.25	1
HMGB2	2.38945e-07	-0.421482	0.024	0.354	0.00690193
LONP2	5.62752e-09	-0.420031	0.012	0.396	0.000162551
TPP1	1.37881e-08	-0.419267	0.094	0.604	0.00039827
KLHDC2	1.77647e-10	-0.418334	0.035	0.521	5.13133e-06
TMEM109	7.32681e-08	-0.418328	0.024	0.375	0.00211635
WDR75	5.93826e-09	-0.418053	0.035	0.458	0.000171527
STOM	3.17506e-11	-0.417361	0.059	0.625	9.17117e-07
WNK1	2.40017e-08	-0.41724	0.024	0.396	0.00069329
MLXIP	5.55192e-08	-0.416966	0.012	0.354	0.00160367
MRPL41	3.3504e-09	-0.416749	0.082	0.604	9.67762e-05
ZNF106	5.86916e-11	-0.416694	0.106	0.729	1.69531e-06
PHYHD1	5.62752e-09	-0.416593	0.012	0.396	0.000162551
LMO3	2.79131e-07	-0.416537	0.035	0.396	0.00806271
ARID4B	3.18842e-09	-0.416486	0.035	0.458	9.20975e-05
C1orf21	7.11958e-10	-0.415895	0.071	0.604	2.05649e-05
BASP1	7.05241e-07	-0.415424	0.024	0.333	0.0203709
ZCCHC11	1.75764e-08	-0.415365	0	0.333	0.000507693
ADAM17	1.51393e-07	-0.414869	0.024	0.354	0.004373
MARK3	5.51824e-09	-0.414861	0	0.354	0.000159394
HMGCL	4.74042e-10	-0.414782	0.024	0.479	1.36927e-05
FERMT2	1.75687e-12	-0.414741	0.047	0.646	5.07471e-08
ANTXR2	3.59962e-12	-0.414718	0.024	0.562	1.03975e-07
VPS41	5.51456e-08	-0.414361	0	0.312	0.00159288
RP11-553L6.5	1.08739e-06	-0.414065	0.012	0.292	0.0314093
CCNB1IP1	5.51456e-08	-0.413951	0	0.312	0.00159288
PKD2	5.55192e-08	-0.413616	0.012	0.354	0.00160367
TMEM80	5.51456e-08	-0.413112	0	0.312	0.00159288
ZRANB1	5.19853e-07	-0.412916	0	0.271	0.015016
STK38L	4.52133e-07	-0.412243	0.012	0.312	0.0130599
GLG1	4.88368e-07	-0.412115	0.024	0.333	0.0141065
CCDC71L	5.51456e-08	-0.411772	0	0.312	0.00159288
AFG3L2	1.04957e-07	-0.411702	0.012	0.333	0.00303169
BCAR1	8.42698e-09	-0.411318	0.024	0.417	0.000243413
BAZ1B	1.75764e-08	-0.409561	0	0.333	0.000507693
NDUFB9	1.3397e-07	-0.409115	0.212	0.792	0.00386973
PRKACB	5.55192e-08	-0.408789	0.012	0.354	0.00160367
RASSF3	4.93038e-07	-0.408652	0.012	0.312	0.0142414
FARP1	3.33201e-07	-0.408635	0.012	0.312	0.00962451
TES	5.41903e-09	-0.408603	0.082	0.583	0.000156529
CTDSP2	4.89808e-06	-0.408338	0.047	0.354	0.141481
CLEC2B	6.74366e-09	-0.407918	0.094	0.625	0.000194791
PPP2CB	1.37832e-11	-0.407228	0.012	0.5	3.98128e-07
FDPS	8.02799e-12	-0.407102	0.071	0.688	2.31888e-07
TTC37	5.19853e-07	-0.407018	0	0.271	0.015016
ANKRD28	8.93386e-06	-0.406652	0.012	0.25	0.258055
SMC4	1.85002e-05	-0.40602	0.024	0.271	0.534379
NDUFB11	1.73266e-08	-0.405549	0.188	0.812	0.00050048
TMEM165	2.50712e-10	-0.404367	0.094	0.667	7.24182e-06
CRELD2	1.24675e-06	-0.403369	0.035	0.354	0.0360122
SSSCA1	1.56595e-08	-0.402443	0.024	0.396	0.000452324
TP53I13	5.51824e-09	-0.40237	0	0.354	0.000159394
APPL1	1.00399e-07	-0.402269	0.012	0.333	0.00290002
CSNK1D	1.3466e-08	-0.401308	0.024	0.417	0.000388966
TTC7B	2.9054e-05	-0.401188	0.012	0.229	0.839224
ATP1A1	2.51174e-08	-0.400844	0.035	0.438	0.000725516
HOMER1	5.14807e-07	-0.399512	0.012	0.312	0.0148702
TOP2B	5.51824e-09	-0.398489	0	0.354	0.000159394
C1orf63	5.51456e-08	-0.398195	0	0.312	0.00159288
MAP1B	3.44886e-07	-0.398085	0.059	0.458	0.00996203
BHLHE40	5.31187e-08	-0.398082	0.012	0.354	0.00153433
ACER3	5.62752e-09	-0.39704	0.012	0.396	0.000162551
PHIP	2.38945e-07	-0.396994	0.024	0.354	0.00690193
TDG	3.81773e-08	-0.396836	0.035	0.417	0.00110275
CYTH2	5.51824e-09	-0.396581	0	0.354	0.000159394
ZHX1	1.13537e-06	-0.39639	0.012	0.292	0.0327952
EAPP	1.04957e-07	-0.396277	0.012	0.333	0.00303169
NLRP1	1.56367e-06	-0.396182	0	0.25	0.0451666
ARL8B	9.6032e-08	-0.396071	0.012	0.333	0.00277388
WASL	1.56367e-06	-0.395895	0	0.25	0.0451666
FZD7	4.64334e-06	-0.394827	0	0.229	0.134123
PDZRN3	5.31187e-08	-0.394482	0.012	0.354	0.00153433
GRN	5.6282e-08	-0.394347	0.188	0.792	0.00162571
IGF2R	3.20531e-06	-0.39401	0.012	0.271	0.0925854
SURF4	3.64223e-06	-0.393961	0.012	0.271	0.105206
SLC8A1	1.42168e-07	-0.393769	0.024	0.375	0.00410653
H1FX	2.2185e-06	-0.393546	0.024	0.312	0.0640813
TWISTNB	1.02255e-06	-0.392964	0.094	0.521	0.0295363
ZBTB16	0.000372847	-0.392917	0.024	0.208	1
CKB	1.33192e-05	-0.39248	0.188	0.646	0.384725
FAM115A	3.11066e-08	-0.392313	0.012	0.354	0.000898513
PPP3CB	1.70511e-07	-0.392123	0	0.292	0.00492522
RBCK1	1.22307e-09	-0.391925	0.035	0.5	3.53283e-05
PTGES	1.56367e-06	-0.391844	0	0.25	0.0451666
CTDSP1	1.70346e-07	-0.390826	0.012	0.333	0.00492043
SLC25A23	8.20848e-06	-0.390609	0.012	0.25	0.237102
SDC2	7.28952e-09	-0.390546	0.059	0.521	0.000210558
HDAC7	5.19853e-07	-0.390061	0	0.271	0.015016
AP2S1	2.97744e-12	-0.389608	0.082	0.75	8.60033e-08
NCKAP1	1.55334e-10	-0.389538	0	0.417	4.48682e-06
NDFIP1	7.26984e-13	-0.389385	0.082	0.729	2.09989e-08
SPATA20	3.72166e-08	-0.388651	0.012	0.354	0.001075
TGOLN2	4.8934e-07	-0.388559	0.035	0.375	0.0141346
CIRBP	4.32618e-06	-0.388457	0.365	0.979	0.124962
WDFY1	9.28911e-05	-0.388408	0.012	0.208	1
PPIL4	3.59627e-07	-0.388263	0.024	0.354	0.0103878
SHKBP1	3.11066e-08	-0.38632	0.012	0.354	0.000898513
TYW3	2.38945e-07	-0.385377	0.024	0.354	0.00690193
TJP1	1.70511e-07	-0.385302	0	0.292	0.00492522
SNAI2	5.19853e-07	-0.384987	0	0.271	0.015016
SLC12A2	4.64334e-06	-0.384562	0	0.229	0.134123
APOL4	0.00173566	-0.384549	0.012	0.146	1
RSBN1	1.75764e-08	-0.384473	0	0.333	0.000507693
ZYX	9.17322e-08	-0.383923	0.071	0.5	0.00264969
PPP1R12B	7.41576e-08	-0.383605	0.071	0.5	0.00214204
PSMA1	1.26885e-08	-0.383454	0.153	0.75	0.000366508
REST	1.05725e-05	-0.383221	0.012	0.25	0.305387
RBM23	1.14246e-06	-0.383162	0.024	0.333	0.0329998
SYNM	3.4906e-06	-0.382825	0.012	0.271	0.100826
TMEM203	1.75764e-08	-0.38267	0	0.333	0.000507693
VPS35	2.88893e-08	-0.382221	0.059	0.5	0.000834467
MXRA8	2.73311e-09	-0.382044	0.047	0.521	7.8946e-05
PLXDC1	1.70511e-07	-0.381848	0	0.292	0.00492522
MSI2	1.53302e-06	-0.381397	0.012	0.292	0.0442813
RRAS	6.09116e-06	-0.381335	0.024	0.292	0.175943
CTBP2	1.61989e-07	-0.381061	0.035	0.396	0.00467906
SYNCRIP	7.96592e-08	-0.381017	0.024	0.375	0.00230096
MTDH	1.83151e-08	-0.380872	0.165	0.771	0.000529031
SAP30	5.51456e-08	-0.380319	0	0.312	0.00159288
ANKIB1	1.49383e-07	-0.380168	0.012	0.333	0.00431493
USP33	3.26132e-09	-0.379659	0.012	0.396	9.42031e-05
LUC7L3	2.60479e-10	-0.379321	0.071	0.625	7.52394e-06
TOLLIP	5.51456e-08	-0.379294	0	0.312	0.00159288
RICTOR	5.08189e-08	-0.379252	0.012	0.354	0.0014679
LAPTM4A	4.59718e-07	-0.379164	0.294	0.938	0.013279
TENC1	1.56367e-06	-0.379034	0	0.25	0.0451666
DNPEP	1.52859e-08	-0.378801	0.024	0.417	0.000441534
RNF146	1.7038e-08	-0.378693	0.012	0.375	0.000492142
MAP1A	5.14807e-07	-0.378663	0.012	0.312	0.0148702
HOXD11	1.75764e-08	-0.378538	0	0.333	0.000507693
SMARCC2	3.96852e-07	-0.378408	0.012	0.312	0.0114631
AHI1	4.74042e-10	-0.377828	0.024	0.479	1.36927e-05
TRADD	2.38945e-07	-0.377774	0.024	0.354	0.00690193
UBE2J1	5.00306e-06	-0.377412	0.024	0.292	0.144513
FNIP1	4.64334e-06	-0.377218	0	0.229	0.134123
LINC00657	5.51824e-09	-0.377106	0	0.354	0.000159394
GPATCH8	1.70511e-07	-0.376664	0	0.292	0.00492522
URM1	4.52133e-07	-0.376343	0.012	0.312	0.0130599
MATR3	3.95697e-14	-0.376315	0.059	0.729	1.14297e-09
KIAA2018	1.56367e-06	-0.376314	0	0.25	0.0451666
THOC2	1.14683e-07	-0.376195	0.012	0.333	0.00331262
MAP4	7.77235e-07	-0.375768	0.047	0.396	0.0224504
NOL8	3.95246e-05	-0.375736	0	0.188	1
SYMPK	1.56367e-06	-0.37546	0	0.25	0.0451666
ID4	0.00011353	-0.375135	0	0.167	1
RASSF8	5.51456e-08	-0.374853	0	0.312	0.00159288
CD276	1.75764e-08	-0.37424	0	0.333	0.000507693
ITPR1	4.50002e-06	-0.37362	0.012	0.271	0.129983
SLFN5	1.56367e-06	-0.372925	0	0.25	0.0451666
SFT2D2	3.06788e-08	-0.372779	0.035	0.438	0.000886157
TMEM50B	1.78165e-08	-0.372676	0.012	0.375	0.000514631
RAB9A	1.61989e-07	-0.372472	0.035	0.396	0.00467906
LONRF1	1.78165e-08	-0.372256	0.012	0.375	0.000514631
FAM134A	4.25476e-08	-0.37225	0.012	0.354	0.00122899
PRPF8	1.70346e-07	-0.372189	0.012	0.333	0.00492043
DBN1	9.14266e-07	-0.372141	0.012	0.292	0.0264086
GLIS1	1.3623e-05	-0.372018	0	0.208	0.3935
PGRMC1	1.07241e-10	-0.371985	0.106	0.75	3.09765e-06
SYT1	5.19853e-07	-0.371879	0	0.271	0.015016
ZBTB7A	8.56384e-06	-0.371157	0.012	0.25	0.247366
RCAN1	7.15241e-05	-0.370661	0.024	0.25	1
CLSTN2	1.3623e-05	-0.36978	0	0.208	0.3935
TPST1	5.19853e-07	-0.369669	0	0.271	0.015016
EIF3A	8.27284e-10	-0.36962	0.059	0.562	2.38961e-05
TIPARP	1.04137e-06	-0.36884	0.012	0.292	0.0300799
TSHZ3	0.00011353	-0.368698	0	0.167	1
GLUD1	5.51456e-08	-0.367777	0	0.312	0.00159288
EXTL2	9.14266e-07	-0.367409	0.012	0.292	0.0264086
USP22	5.47662e-08	-0.367261	0.035	0.417	0.00158192
C1orf56	1.7132e-05	-0.366798	0.024	0.271	0.494859
BMPR2	2.81591e-07	-0.366114	0.024	0.354	0.00813376
SP5	1.53302e-06	-0.365812	0.012	0.292	0.0442813
PAM	1.75764e-08	-0.36581	0	0.333	0.000507693
HSF1	2.69669e-06	-0.365357	0.035	0.333	0.077894
NXT1	1.30964e-07	-0.365207	0.024	0.375	0.00378289
NFKBIZ	1.56367e-06	-0.365185	0	0.25	0.0451666
CDK4	2.50547e-11	-0.365091	0.082	0.688	7.23706e-07
GOT2	5.14807e-07	-0.364991	0.012	0.312	0.0148702
FAM103A1	4.6818e-09	-0.364897	0.024	0.438	0.000135234
TSPYL2	5.51456e-08	-0.364481	0	0.312	0.00159288
INSR	1.56367e-06	-0.36448	0	0.25	0.0451666
PGM2L1	4.64334e-06	-0.364256	0	0.229	0.134123
RDH11	3.59014e-07	-0.36348	0.035	0.375	0.0103701
TMBIM6	3.76415e-07	-0.363423	0.176	0.729	0.0108727
CCS	1.34496e-06	-0.3634	0.035	0.354	0.0388491
YTHDF2	3.9789e-08	-0.362598	0.024	0.396	0.00114931
PTGDS	0.011187	-0.362438	0.376	0.688	1
RALY	3.28555e-07	-0.362258	0.129	0.625	0.00949031
SECISBP2	7.64742e-07	-0.362051	0.024	0.333	0.0220896
FAM192A	4.061e-07	-0.361912	0.024	0.354	0.0117302
EXOSC8	4.64334e-06	-0.361761	0	0.229	0.134123
PSMD1	1.30925e-07	-0.361728	0.012	0.333	0.00378178
AR	1.56367e-06	-0.361717	0	0.25	0.0451666
CRK	5.14807e-07	-0.361634	0.012	0.312	0.0148702
GPRC5B	1.70511e-07	-0.361521	0	0.292	0.00492522
PVRL2	5.62752e-09	-0.361287	0.012	0.396	0.000162551
MRGPRF	1.23706e-06	-0.360673	0.024	0.333	0.0357326
FAS	1.56367e-06	-0.360106	0	0.25	0.0451666
RDH14	4.74042e-10	-0.360101	0.024	0.479	1.36927e-05
PLTP	1.2529e-11	-0.359803	0.071	0.688	3.61899e-07
TRIM38	1.70511e-07	-0.359387	0	0.292	0.00492522
CTNND1	5.51824e-09	-0.359151	0	0.354	0.000159394
RERG	7.04627e-08	-0.358928	0.047	0.458	0.00203531
PTK7	1.3623e-05	-0.358772	0	0.208	0.3935
PDLIM5	2.65783e-07	-0.357911	0.047	0.417	0.00767713
IFI16	4.4752e-10	-0.357751	0.082	0.625	1.29266e-05
TNFSF10	1.56367e-06	-0.356654	0	0.25	0.0451666
GADD45G	0.00011353	-0.356412	0	0.167	1
GSN	1.44284e-06	-0.356285	0.247	0.833	0.0416765
FJX1	0.000914838	-0.356182	0	0.125	1
ICAM1	1.70511e-07	-0.35562	0	0.292	0.00492522
U2AF2	5.19853e-07	-0.354613	0	0.271	0.015016
TSPAN3	5.34591e-07	-0.354165	0.047	0.417	0.0154417
CEBPD	3.88772e-07	-0.353896	0.118	0.583	0.0112297
INHBA	2.2185e-06	-0.353592	0.024	0.312	0.0640813
MBD4	5.19853e-07	-0.353102	0	0.271	0.015016
SLC2A3	1.3623e-05	-0.352781	0	0.208	0.3935
P4HB	7.87054e-10	-0.352539	0.082	0.625	2.2734e-05
SLK	1.56367e-06	-0.352395	0	0.25	0.0451666
PGLS	5.44376e-10	-0.352	0.071	0.604	1.57243e-05
TSC22D4	1.75191e-07	-0.351966	0.035	0.396	0.00506039
MIDN	1.70346e-07	-0.351875	0.012	0.333	0.00492043
PGM5	1.53531e-09	-0.351166	0.024	0.458	4.43476e-05
VAMP2	7.85121e-12	-0.350081	0.118	0.812	2.26782e-07
SHMT1	1.56367e-06	-0.349922	0	0.25	0.0451666
RSPRY1	5.19853e-07	-0.349911	0	0.271	0.015016
PABPN1	2.05398e-08	-0.349904	0.035	0.438	0.000593292
PRR24	4.50002e-06	-0.349662	0.012	0.271	0.129983
TNFRSF14	2.1921e-08	-0.349458	0.071	0.521	0.000633187
EVA1C	0.000134168	-0.349445	0.024	0.229	1
CACUL1	5.51824e-09	-0.349301	0	0.354	0.000159394
ASAH1	1.37882e-05	-0.348388	0.365	0.979	0.398272
CHD2	5.19853e-07	-0.348248	0	0.271	0.015016
BNC2	4.64334e-06	-0.34822	0	0.229	0.134123
FADS2	5.51456e-08	-0.347956	0	0.312	0.00159288
RNPS1	1.74894e-09	-0.347847	0.012	0.417	5.05181e-05
FZD3	1.3623e-05	-0.347708	0	0.208	0.3935
CTHRC1	0.000104876	-0.346867	0.012	0.208	1
RHOT2	1.70511e-07	-0.3467	0	0.292	0.00492522
CLPP	4.49487e-08	-0.346598	0.059	0.5	0.00129834
TMF1	1.53302e-06	-0.346085	0.012	0.292	0.0442813
BSG	4.97294e-10	-0.345985	0.2	0.938	1.43643e-05
SMAD4	5.19853e-07	-0.345879	0	0.271	0.015016
GANAB	2.70288e-07	-0.345149	0.024	0.354	0.00780726
DENND4C	1.04137e-06	-0.345135	0.012	0.292	0.0300799
COPRS	1.3285e-10	-0.344678	0.106	0.729	3.83737e-06
PRELP	1.58401e-07	-0.344285	0.082	0.542	0.00457541
ATP6V0A1	1.78165e-08	-0.344197	0.012	0.375	0.000514631
KIF1B	1.70511e-07	-0.343778	0	0.292	0.00492522
ZNF207	6.75445e-09	-0.343474	0.059	0.521	0.000195102
LINC00969	6.04475e-06	-0.343403	0.047	0.354	0.174603
ALAS1	1.70511e-07	-0.343347	0	0.292	0.00492522
PPT1	9.1584e-08	-0.343248	0.035	0.417	0.0026454
FBXO25	5.51456e-08	-0.342993	0	0.312	0.00159288
LRRC17	5.19853e-07	-0.342817	0	0.271	0.015016
CYBRD1	7.17257e-07	-0.342668	0.035	0.375	0.020718
HSD17B12	1.5692e-08	-0.341826	0.047	0.479	0.000453264
THRAP3	5.41903e-09	-0.34141	0.082	0.583	0.000156529
FAM213A	1.28209e-08	-0.341383	0.176	0.812	0.000370333
HELZ	1.35824e-05	-0.341296	0.024	0.271	0.392327
COQ10B	5.55192e-08	-0.340581	0.012	0.354	0.00160367
RNF187	3.59962e-12	-0.33972	0.024	0.562	1.03975e-07
NUMA1	5.19853e-07	-0.338862	0	0.271	0.015016
PAK2	1.82176e-07	-0.338664	0.035	0.396	0.00526215
CTD-2314B22.3	1.56367e-06	-0.338136	0	0.25	0.0451666
ZNF618	0.000914838	-0.337854	0	0.125	1
IBTK	5.94117e-05	-0.337806	0.024	0.25	1
ROR2	1.56367e-06	-0.337027	0	0.25	0.0451666
ARHGEF12	3.95246e-05	-0.337009	0	0.188	1
BCL2L13	2.2185e-06	-0.336245	0.024	0.312	0.0640813
ZNF580	1.75191e-07	-0.33615	0.035	0.396	0.00506039
FOXN3	1.52859e-08	-0.335968	0.024	0.417	0.000441534
CAT	2.56871e-06	-0.335567	0.047	0.375	0.0741973
NCOA4	5.05636e-08	-0.335462	0.035	0.417	0.00146053
LAMC1	1.70346e-07	-0.335301	0.012	0.333	0.00492043
JAK1	3.04071e-10	-0.334824	0.071	0.625	8.7831e-06
KIAA2026	1.99722e-05	-0.334774	0.024	0.271	0.576896
C9orf3	2.79639e-08	-0.334673	0.106	0.625	0.000807736
QKI	2.27281e-06	-0.334193	0.035	0.354	0.0656501
CRTAC1	1.3623e-05	-0.333997	0	0.208	0.3935
STX3	5.19853e-07	-0.33392	0	0.271	0.015016
HNRNPR	1.6797e-09	-0.333348	0.035	0.479	4.85181e-05
MDM4	1.56367e-06	-0.332926	0	0.25	0.0451666
DPM2	5.14807e-07	-0.332733	0.012	0.312	0.0148702
AMIGO2	1.70511e-07	-0.332719	0	0.292	0.00492522
POP7	4.14865e-08	-0.332704	0.024	0.396	0.00119834
LEPROTL1	1.7038e-08	-0.332599	0.012	0.375	0.000492142
DACT3	1.70511e-07	-0.332467	0	0.292	0.00492522
RSRC1	5.55192e-08	-0.332382	0.012	0.354	0.00160367
SRSF10.1	3.95246e-05	-0.33231	0	0.188	1
HNRNPDL	4.69204e-07	-0.33202	0.212	0.792	0.0135529
UBR2	1.56367e-06	-0.331749	0	0.25	0.0451666
POLR2G	8.25973e-11	-0.331285	0.047	0.583	2.38582e-06
MACROD1	8.93386e-06	-0.331203	0.012	0.25	0.258055
AP2A1	4.50002e-06	-0.330928	0.012	0.271	0.129983
EPAS1	2.402e-06	-0.330543	0.024	0.312	0.0693817
FAM89B	7.05241e-07	-0.33018	0.024	0.333	0.0203709
POLR2J3	3.13247e-07	-0.330179	0.035	0.396	0.00904813
GMPS	9.31914e-06	-0.329545	0.012	0.25	0.269183
SPG20	1.18663e-08	-0.329448	0.035	0.458	0.000342758
XPNPEP1	1.3623e-05	-0.329156	0	0.208	0.3935
PDPK1	1.70511e-07	-0.329109	0	0.292	0.00492522
PAFAH1B2	1.56367e-06	-0.328948	0	0.25	0.0451666
TSPYL1	2.89063e-07	-0.328506	0.059	0.458	0.00834958
MED13L	5.51456e-08	-0.328116	0	0.312	0.00159288
GTF2F2	0.000520816	-0.328091	0.035	0.229	1
ERICH1	0.000210176	-0.327818	0.035	0.25	1
PKN2	9.70256e-06	-0.327771	0.024	0.292	0.280259
AL592183.1	5.55192e-08	-0.327471	0.012	0.354	0.00160367
APMAP	4.54257e-06	-0.327346	0.035	0.333	0.131212
DNAJB9	2.60002e-06	-0.326931	0.024	0.312	0.0751017
NPC2	0.0011676	-0.326625	0.576	0.979	1
LRRC8A	1.78165e-08	-0.326477	0.012	0.375	0.000514631
LMOD1	3.07713e-07	-0.326204	0.094	0.542	0.00888828
NUDT3	5.08534e-07	-0.326181	0.035	0.375	0.014689
NIT2	5.51456e-08	-0.326116	0	0.312	0.00159288
CHPF	1.70346e-07	-0.325774	0.012	0.333	0.00492043
STAT6	5.14807e-07	-0.325277	0.012	0.312	0.0148702
PSMD9	1.45059e-06	-0.325245	0.035	0.354	0.0419003
PTPN1	6.89288e-05	-0.324942	0.024	0.25	1
TAPBP	1.0389e-06	-0.324163	0.047	0.396	0.0300086
ANKRD12	1.26944e-10	-0.324143	0.047	0.562	3.66677e-06
ZNF664	1.56367e-06	-0.324109	0	0.25	0.0451666
PCM1	2.38945e-07	-0.32394	0.024	0.354	0.00690193
PURA	2.78728e-05	-0.32389	0.012	0.229	0.805106
TBL1X	1.46896e-06	-0.323496	0.012	0.292	0.0424309
LTBP4	4.50002e-06	-0.323315	0.012	0.271	0.129983
LDOC1	5.19853e-07	-0.323268	0	0.271	0.015016
PHLDA3	2.57195e-06	-0.323263	0.094	0.5	0.0742907
LAMC3	0.00011353	-0.323118	0	0.167	1
ZFHX3	1.56367e-06	-0.323041	0	0.25	0.0451666
TMEM127	1.04137e-06	-0.322666	0.012	0.292	0.0300799
DLG5	3.95246e-05	-0.322565	0	0.188	1
TMEM161A	5.19853e-07	-0.32248	0	0.271	0.015016
PAWR	3.0145e-07	-0.322137	0.035	0.396	0.0087074
LZTS2	4.64334e-06	-0.321563	0	0.229	0.134123
CUX1	1.70511e-07	-0.321444	0	0.292	0.00492522
TLE4	1.53531e-09	-0.321122	0.024	0.458	4.43476e-05
WIPI1	8.05455e-05	-0.320697	0.035	0.271	1
RFTN1	1.42168e-07	-0.320433	0.024	0.375	0.00410653
G0S2	0.0156666	-0.320252	0.012	0.104	1
NUDT4	2.68579e-07	-0.320012	0.035	0.396	0.0077579
RIC8A	4.50002e-06	-0.319414	0.012	0.271	0.129983
COPB2	5.14807e-07	-0.319328	0.012	0.312	0.0148702
NELFE	8.81389e-09	-0.319303	0.059	0.521	0.000254589
ADAMTS1	5.51456e-08	-0.318913	0	0.312	0.00159288
FBXO21	4.64334e-06	-0.318772	0	0.229	0.134123
HDAC5	1.3623e-05	-0.318749	0	0.208	0.3935
WWTR1	5.14807e-07	-0.318672	0.012	0.312	0.0148702
BBX	3.22828e-08	-0.318508	0.059	0.5	0.00093249
GNAI2	6.42148e-08	-0.31818	0.059	0.479	0.00185484
2021-09-11	8.4282e-06	-0.317852	0.059	0.375	0.243449
RAB6A	1.54872e-08	-0.317789	0.059	0.521	0.000447349
VPS37A	4.32928e-07	-0.317266	0.012	0.312	0.0125051
MAGT1	1.04137e-06	-0.316994	0.012	0.292	0.0300799
PMM1	4.64334e-06	-0.316702	0	0.229	0.134123
SLC25A26	1.70511e-07	-0.316558	0	0.292	0.00492522
EXOC3	1.3623e-05	-0.316456	0	0.208	0.3935
CLN3.1	3.18899e-07	-0.316338	0.012	0.312	0.00921141
TSPAN6	1.56367e-06	-0.315638	0	0.25	0.0451666
SPAG7	7.77428e-09	-0.31553	0.082	0.583	0.00022456
ITGAE	3.77754e-09	-0.315209	0.024	0.438	0.000109114
ANGPTL2	1.52859e-08	-0.315142	0.024	0.417	0.000441534
PPAPDC1B	1.56367e-06	-0.315129	0	0.25	0.0451666
FSCN1	0.000323332	-0.31512	0	0.146	1
UBL3	1.42168e-07	-0.31494	0.024	0.375	0.00410653
DNAJB11	3.83556e-08	-0.314663	0.047	0.458	0.0011079
FNTA	1.52859e-08	-0.314318	0.024	0.417	0.000441534
LRRFIP1	1.23625e-08	-0.314201	0.082	0.583	0.000357091
BCKDK	5.24811e-09	-0.314052	0.035	0.458	0.000151592
MUM1L1	4.64334e-06	-0.31372	0	0.229	0.134123
TACC2	4.50002e-06	-0.313609	0.012	0.271	0.129983
CHRDL1	3.7203e-05	-0.313589	0.012	0.229	1
ARHGEF10	0.000914838	-0.313453	0	0.125	1
COL6A1	1.17144e-10	-0.313452	0.035	0.542	3.38371e-06
CHRD	0.00011353	-0.313362	0	0.167	1
PPP1R15A	1.43795e-10	-0.313304	0.024	0.5	4.15351e-06
ABR	8.98412e-06	-0.312912	0.024	0.292	0.259506
POLR2J	7.40249e-11	-0.31266	0.071	0.625	2.13821e-06
ATP6V0D1	4.60373e-10	-0.312614	0.082	0.646	1.32979e-05
CLN6	4.64334e-06	-0.312574	0	0.229	0.134123
ANK3	4.64334e-06	-0.312289	0	0.229	0.134123
LARP7	1.02203e-06	-0.311936	0.071	0.458	0.0295215
CTNNA1	5.15505e-07	-0.311828	0.047	0.417	0.0148904
FKBP5	2.24018e-09	-0.311537	0.094	0.625	6.47075e-05
RNF19A	1.70346e-07	-0.311162	0.012	0.333	0.00492043
SESN3	1.52859e-08	-0.311099	0.024	0.417	0.000441534
RNF213	1.55544e-05	-0.310959	0.047	0.333	0.449288
TAX1BP1	7.96045e-10	-0.310182	0.106	0.688	2.29938e-05
RAD23B	1.8943e-07	-0.310168	0.035	0.396	0.00547168
CELF2	3.82037e-10	-0.310099	0.035	0.521	1.10351e-05
SLC7A2	4.64334e-06	-0.309735	0	0.229	0.134123
SMARCA1	4.50002e-06	-0.309597	0.012	0.271	0.129983
GPBP1	2.50416e-08	-0.309564	0.024	0.396	0.000723328
FLJ27365	1.56367e-06	-0.309383	0	0.25	0.0451666
SYNE1	1.74894e-09	-0.309337	0.012	0.417	5.05181e-05
UBE2R2	4.64246e-07	-0.309002	0.047	0.396	0.0134097
SEC22C	7.40366e-06	-0.308768	0.024	0.292	0.213855
KPNA6	4.72847e-06	-0.308691	0.047	0.354	0.136582
ZRANB2	1.2897e-06	-0.30859	0.071	0.458	0.0372531
CASC4	5.51456e-08	-0.308343	0	0.312	0.00159288
SH3PXD2A	1.30265e-05	-0.308094	0.012	0.25	0.37627
IL6ST	3.55193e-08	-0.308024	0.047	0.458	0.00102597
ANKRA2	1.56367e-06	-0.307836	0	0.25	0.0451666
CAMK2D	1.56367e-06	-0.307791	0	0.25	0.0451666
DCAF10	1.70346e-07	-0.307696	0.012	0.333	0.00492043
MZT2A	1.55437e-07	-0.30745	0.106	0.583	0.0044898
PTP4A2	1.41493e-09	-0.307351	0.071	0.583	4.08703e-05
CBX3	4.64008e-10	-0.307338	0.071	0.625	1.34029e-05
GOLGA4	3.46369e-08	-0.30692	0.094	0.562	0.00100049
GNPAT	1.53302e-06	-0.306561	0.012	0.292	0.0442813
B3GNT5	3.20531e-06	-0.306286	0.012	0.271	0.0925854
DIP2C	5.19853e-07	-0.306067	0	0.271	0.015016
USP11	5.31055e-05	-0.305318	0.024	0.25	1
TOR3A	1.3623e-05	-0.305268	0	0.208	0.3935
MYOF	3.20531e-06	-0.30525	0.012	0.271	0.0925854
CHPT1	5.65713e-10	-0.30514	0.071	0.604	1.63406e-05
FNBP4	2.67374e-05	-0.305117	0.012	0.229	0.77231
PRNP	9.90501e-08	-0.304976	0.035	0.417	0.00286106
FBXW11	1.08739e-06	-0.304743	0.012	0.292	0.0314093
SNAPIN	2.27344e-08	-0.303972	0.071	0.521	0.000656682
PPAP2C	4.64334e-06	-0.303862	0	0.229	0.134123
TPRKB	2.72134e-08	-0.303756	0.035	0.438	0.000786058
USP47	2.78728e-05	-0.303732	0.012	0.229	0.805106
EXOC7	3.84442e-09	-0.303702	0.035	0.479	0.000111046
LPAR1	0.000203576	-0.303353	0.012	0.188	1
ETV5	3.95246e-05	-0.303258	0	0.188	1
ARL6IP1	5.61908e-09	-0.303243	0.082	0.583	0.000162307
ZC3H6	5.51456e-08	-0.302624	0	0.312	0.00159288
TXNIP	1.7782e-07	-0.30258	0.2	0.812	0.00513634
PWWP2A	1.3623e-05	-0.302573	0	0.208	0.3935
FAM114A1	5.62752e-09	-0.302547	0.012	0.396	0.000162551
CAPRIN1	1.56367e-06	-0.30245	0	0.25	0.0451666
VPS13C	1.85002e-05	-0.302357	0.024	0.271	0.534379
SNX1	6.84911e-06	-0.302328	0.024	0.292	0.197836
TCEAL7	4.2284e-07	-0.3018	0.024	0.354	0.0122137
ZNF37A	1.53302e-06	-0.301517	0.012	0.292	0.0442813
RBM24	1.56367e-06	-0.301185	0	0.25	0.0451666
C17orf62	4.64334e-06	-0.301077	0	0.229	0.134123
CIC	3.95246e-05	-0.30098	0	0.188	1
MT1E	2.78511e-05	-0.300703	0.082	0.417	0.804479
ATF6B	4.32542e-08	-0.300585	0.024	0.396	0.0012494
KIAA0355	3.95246e-05	-0.30058	0	0.188	1
FAM110B	3.95246e-05	-0.300566	0	0.188	1
C3orf38	1.56367e-06	-0.299937	0	0.25	0.0451666
C20orf27	1.2941e-05	-0.299716	0.035	0.312	0.3738
WASH4P	1.52859e-08	-0.299523	0.024	0.417	0.000441534
LIMS1	1.88384e-07	-0.299508	0.059	0.458	0.00544148
PNPLA6	0.000120083	-0.299375	0.024	0.229	1
ABHD2	4.50002e-06	-0.29928	0.012	0.271	0.129983
P2RX4	4.50002e-06	-0.299163	0.012	0.271	0.129983
TNIK	1.56367e-06	-0.298844	0	0.25	0.0451666
AK2	9.66486e-07	-0.298801	0.047	0.396	0.0279169
TARSL2	3.95246e-05	-0.298474	0	0.188	1
TAP1	3.42717e-05	-0.29846	0.012	0.229	0.989937
RAD51B	5.55192e-08	-0.29814	0.012	0.354	0.00160367
HDAC3	4.3143e-06	-0.298057	0.012	0.271	0.124618
VEZT	5.19853e-07	-0.298042	0	0.271	0.015016
DNAJC2	8.29065e-07	-0.297519	0.024	0.333	0.0239475
CDC42EP3	2.27281e-06	-0.297265	0.035	0.354	0.0656501
C8orf4	0.00249132	-0.29696	0.059	0.25	1
ID3	1.96797e-05	-0.296817	0.071	0.396	0.568447
PTPRD	3.95246e-05	-0.296738	0	0.188	1
CCAR1	3.4906e-06	-0.296736	0.012	0.271	0.100826
VAT1	1.17803e-09	-0.296569	0.106	0.688	3.40274e-05
ERP29	4.31958e-10	-0.296508	0.153	0.833	1.24771e-05
OFD1	2.15552e-05	-0.296409	0.024	0.271	0.622621
PIK3R1	4.061e-07	-0.296302	0.024	0.354	0.0117302
ATF7IP	3.95246e-05	-0.2961	0	0.188	1
KLF13	0.00011353	-0.295796	0	0.167	1
NFIX	6.39876e-07	-0.295727	0.035	0.375	0.0184828
ACAA1	1.53302e-06	-0.29564	0.012	0.292	0.0442813
RALA	2.81591e-07	-0.295542	0.024	0.354	0.00813376
ABCB5	0.000104876	-0.295501	0.012	0.208	1
DNAJA2	1.70346e-07	-0.295386	0.012	0.333	0.00492043
RIT1	1.3623e-05	-0.295383	0	0.208	0.3935
SLC44A1	1.3623e-05	-0.295306	0	0.208	0.3935
TBX2	0.00011353	-0.295297	0	0.167	1
TERF1	5.14807e-07	-0.29522	0.012	0.312	0.0148702
LSM10	2.46688e-07	-0.295124	0.047	0.417	0.00712559
ANKS3	4.64334e-06	-0.29477	0	0.229	0.134123
KMT2A	2.3085e-06	-0.2947	0.024	0.312	0.066681
SH3GLB2	4.13593e-06	-0.293955	0.012	0.271	0.119466
CCDC91	2.59423e-07	-0.293879	0.024	0.354	0.00749344
TRAM1	2.89457e-10	-0.293708	0.047	0.562	8.36096e-06
HSPA5	9.88312e-11	-0.293667	0.047	0.562	2.85474e-06
DHRS7B	4.64334e-06	-0.293603	0	0.229	0.134123
CYB5R1	1.78165e-08	-0.293426	0.012	0.375	0.000514631
EMC7	1.11979e-08	-0.293264	0.082	0.562	0.000323451
NKAP	6.33442e-06	-0.293105	0.024	0.292	0.18297
PHF14	1.08584e-05	-0.293011	0.047	0.354	0.313644
INPP4A	1.24959e-05	-0.292338	0.012	0.25	0.360943
BAMBI	4.64334e-06	-0.292276	0	0.229	0.134123
MACF1	3.97174e-08	-0.29213	0.059	0.479	0.00114724
MAPRE3	4.64334e-06	-0.291904	0	0.229	0.134123
ELOF1	7.6841e-08	-0.291567	0.071	0.5	0.00221955
KRIT1	9.0004e-06	-0.291338	0.035	0.312	0.259977
HNRNPL	3.95246e-05	-0.291259	0	0.188	1
EFHC1	4.64334e-06	-0.291122	0	0.229	0.134123
ZNF639	1.3623e-05	-0.291116	0	0.208	0.3935
SERTAD3	1.56367e-06	-0.291	0	0.25	0.0451666
SCAMP1	3.20531e-06	-0.290733	0.012	0.271	0.0925854
PLEKHA5	4.70111e-08	-0.290519	0.024	0.396	0.00135792
TRIM25	1.3623e-05	-0.29031	0	0.208	0.3935
IL13RA1	1.56367e-06	-0.290274	0	0.25	0.0451666
SENP6	2.8565e-06	-0.289894	0.047	0.375	0.0825099
SCN1B	1.56367e-06	-0.289846	0	0.25	0.0451666
STARD10	4.3781e-06	-0.289635	0.035	0.333	0.126461
DCX	0.00257902	-0.28937	0	0.104	1
WDR11	4.64334e-06	-0.289279	0	0.229	0.134123
DNAJC18	0.00011353	-0.28912	0	0.167	1
PLIN2	8.59616e-08	-0.288967	0.188	0.729	0.002483
AMN1	4.50002e-06	-0.288964	0.012	0.271	0.129983
PEMT	0.00011353	-0.288922	0	0.167	1
CUL2	0.00011353	-0.288902	0	0.167	1
SNCAIP	3.7203e-05	-0.288898	0.012	0.229	1
HNRNPM	6.09e-09	-0.28889	0.059	0.542	0.00017591
DTX3	4.64334e-06	-0.288805	0	0.229	0.134123
NAE1	1.42168e-07	-0.288777	0.024	0.375	0.00410653
GRAMD1A	4.50002e-06	-0.288237	0.012	0.271	0.129983
CDC42EP1	5.19853e-07	-0.288145	0	0.271	0.015016
RAP1B	1.44998e-10	-0.288002	0.129	0.812	4.18825e-06
UBALD1	1.3623e-05	-0.287948	0	0.208	0.3935
ZNF277	0.00257902	-0.287619	0	0.104	1
SUZ12	4.13593e-06	-0.287331	0.012	0.271	0.119466
PIK3C2A	5.51456e-08	-0.287317	0	0.312	0.00159288
PDE4DIP	7.23107e-08	-0.287156	0.035	0.417	0.0020887
P4HA2	1.30265e-05	-0.287146	0.012	0.25	0.37627
EMC3	1.33385e-05	-0.28701	0.059	0.375	0.385282
PLAGL1	1.56367e-06	-0.286666	0	0.25	0.0451666
EPC1	5.62752e-09	-0.286501	0.012	0.396	0.000162551
SERPINB1	3.0441e-06	-0.28628	0.024	0.312	0.0879288
TSPAN9	1.53302e-06	-0.285847	0.012	0.292	0.0442813
VPS25	2.41554e-05	-0.285846	0.024	0.271	0.697729
PHAX	1.56367e-06	-0.285833	0	0.25	0.0451666
PEX16	1.23706e-06	-0.285787	0.024	0.333	0.0357326
RPUSD3	9.72026e-06	-0.285766	0.012	0.25	0.28077
TRMT10C	1.92228e-05	-0.285374	0.024	0.271	0.55525
2021-09-09	3.07119e-06	-0.28532	0.012	0.271	0.0887113
ZMYM2	1.3623e-05	-0.285283	0	0.208	0.3935
BSDC1	1.56367e-06	-0.284983	0	0.25	0.0451666
ID1	0.00173566	-0.284901	0.012	0.146	1
SLC25A11	2.40872e-11	-0.284861	0.082	0.688	6.95758e-07
TSPYL5	4.64334e-06	-0.284719	0	0.229	0.134123
FSTL1	1.75967e-07	-0.284258	0.047	0.417	0.0050828
TTC17	5.19853e-07	-0.284188	0	0.271	0.015016
BEND5	0.00257902	-0.284083	0	0.104	1
GUSB	5.69894e-09	-0.284042	0.035	0.458	0.000164614
SMIM15	1.92228e-05	-0.284038	0.024	0.271	0.55525
THSD4	1.3623e-05	-0.28399	0	0.208	0.3935
C1GALT1	0.000323332	-0.283863	0	0.146	1
TMEM55B	3.424e-06	-0.283832	0.024	0.312	0.0989021
ALKBH7	1.14775e-08	-0.283671	0.129	0.688	0.000331528
COQ7	1.53302e-06	-0.283643	0.012	0.292	0.0442813
GRINA	1.07251e-08	-0.28358	0.082	0.583	0.000309795
WHAMM	1.56367e-06	-0.283185	0	0.25	0.0451666
TOR1AIP2	0.000291979	-0.283052	0.012	0.188	1
TMEM248	2.58412e-07	-0.283006	0.035	0.396	0.00746424
MAFB	0.000323332	-0.282904	0	0.146	1
CYGB	8.29065e-07	-0.282521	0.024	0.333	0.0239475
SLC15A3	1.08739e-06	-0.282299	0.012	0.292	0.0314093
SIGMAR1	5.51456e-08	-0.282168	0	0.312	0.00159288
UBA2	6.42148e-08	-0.282119	0.059	0.479	0.00185484
ETF1	1.0969e-05	-0.282101	0.059	0.375	0.31684
MT1X	0.000116552	-0.281881	0.071	0.354	1
SETBP1	4.64334e-06	-0.281805	0	0.229	0.134123
RYK	4.64334e-06	-0.281694	0	0.229	0.134123
TCF7L2	0.000139199	-0.281526	0.024	0.229	1
SPATS2	4.2973e-09	-0.281289	0.024	0.438	0.000124127
HNRNPA2B1	1.56431e-09	-0.281193	0.2	0.875	4.51852e-05
RAB20	4.6818e-09	-0.281146	0.024	0.438	0.000135234
KRT10	8.97268e-09	-0.280955	0.082	0.583	0.000259176
HMGXB4	1.56367e-06	-0.280792	0	0.25	0.0451666
RBBP6	6.42106e-08	-0.280625	0.035	0.417	0.00185472
CACNA1C	1.3623e-05	-0.280602	0	0.208	0.3935
TMOD3	1.56367e-06	-0.280375	0	0.25	0.0451666
RPAIN	7.57229e-09	-0.280327	0.059	0.521	0.000218726
C15orf61	1.30265e-05	-0.280314	0.012	0.25	0.37627
PCGF2	1.53302e-06	-0.280158	0.012	0.292	0.0442813
FAM53C	1.3623e-05	-0.280105	0	0.208	0.3935
CIAO1	4.92595e-05	-0.280082	0.024	0.25	1
NMB	5.55192e-08	-0.279867	0.012	0.354	0.00160367
GJA1	1.52859e-08	-0.279676	0.024	0.417	0.000441534
STAT1	4.8864e-09	-0.279597	0.024	0.438	0.000141144
RAB30-AS1	1.85002e-05	-0.279377	0.024	0.271	0.534379
ARID4A	4.50002e-06	-0.279373	0.012	0.271	0.129983
DDIT3	2.5397e-06	-0.279133	0.035	0.354	0.0733593
YAP1	1.56367e-06	-0.279121	0	0.25	0.0451666
CUL3	4.64334e-06	-0.278854	0	0.229	0.134123
CHTOP	4.061e-07	-0.278651	0.024	0.354	0.0117302
CTSK	0.000602707	-0.278551	0.647	1	1
POPDC2	7.59015e-06	-0.27848	0.071	0.417	0.219242
ILF3	4.93038e-07	-0.278303	0.012	0.312	0.0142414
LRCH1	1.3623e-05	-0.278137	0	0.208	0.3935
CDKN1C	8.94928e-10	-0.278134	0.059	0.562	2.585e-05
CUTA	2.38758e-07	-0.278082	0.271	0.958	0.00689653
YIPF3	6.99387e-11	-0.278041	0.047	0.583	2.02018e-06
PITX2	4.64334e-06	-0.277806	0	0.229	0.134123
PCMTD1	9.69363e-09	-0.277606	0.035	0.458	0.00028
WTAP	4.22756e-11	-0.277554	0.059	0.625	1.22113e-06
PHF3	1.34151e-05	-0.277494	0.035	0.312	0.387496
OLFML1	0.00011353	-0.277491	0	0.167	1
MCL1	5.68658e-08	-0.277479	0.094	0.583	0.00164257
PLEKHA3	1.70346e-07	-0.277474	0.012	0.333	0.00492043
PIP4K2A	2.94246e-06	-0.277364	0.012	0.271	0.0849929
CASC15	1.3623e-05	-0.276176	0	0.208	0.3935
MTX1	4.2284e-07	-0.276141	0.024	0.354	0.0122137
PSMD10	3.95246e-05	-0.275588	0	0.188	1
STK16	4.64334e-06	-0.275514	0	0.229	0.134123
IFNGR1	4.8501e-06	-0.2755	0.071	0.417	0.140095
SCFD1	0.000220716	-0.275316	0.012	0.188	1
SORBS1	3.7203e-05	-0.275289	0.012	0.229	1
TMEM138	5.14807e-07	-0.275158	0.012	0.312	0.0148702
DNAJC3	4.70845e-07	-0.27503	0.035	0.375	0.0136004
GOSR1	1.56367e-06	-0.274938	0	0.25	0.0451666
GTF2IRD2	4.64334e-06	-0.274914	0	0.229	0.134123
GPRC5C	6.0888e-06	-0.274708	0.035	0.333	0.175875
ISOC1	7.73773e-07	-0.274678	0.035	0.375	0.0223504
TBC1D1	2.80007e-06	-0.274633	0.035	0.333	0.0808801
PDXDC1	3.95246e-05	-0.27454	0	0.188	1
SDCBP	0.00010965	-0.274442	0.353	0.958	1
TRIO	0.000211983	-0.274425	0.012	0.188	1
PTPRS	0.000280622	-0.274232	0.012	0.188	1
RHOBTB3	0.000139199	-0.274103	0.024	0.229	1
WAC	2.84346e-09	-0.273947	0.047	0.521	8.21335e-05
TNRC6A	6.58696e-06	-0.273711	0.024	0.292	0.190264
TTLL7	3.95246e-05	-0.273587	0	0.188	1
MFSD10	2.9054e-05	-0.27353	0.012	0.229	0.839224
KLHDC10	0.00469802	-0.273306	0.012	0.125	1
TSEN34	3.11108e-08	-0.273223	0.059	0.5	0.000898636
KPNA4	1.70511e-07	-0.273093	0	0.292	0.00492522
ARHGAP29	1.30265e-05	-0.272906	0.012	0.25	0.37627
MLTK	4.27415e-07	-0.272823	0.247	0.875	0.0123459
ABCA8	0.000323332	-0.27282	0	0.146	1
MOB4	1.70346e-07	-0.272772	0.012	0.333	0.00492043
ACSL3	3.02826e-05	-0.272577	0.012	0.229	0.874713
RAP2B	1.3623e-05	-0.272564	0	0.208	0.3935
CHD6	7.69947e-05	-0.272528	0.024	0.25	1
UPF2	3.74517e-07	-0.272467	0.024	0.354	0.0108179
TCF12	3.02826e-05	-0.272434	0.012	0.229	0.874713
TSC22D2	2.67374e-05	-0.272411	0.012	0.229	0.77231
CREBRF	1.56367e-06	-0.27237	0	0.25	0.0451666
RABEP1	5.14807e-07	-0.271858	0.012	0.312	0.0148702
SAMD4B	0.000100728	-0.271776	0.012	0.208	1
CADM1	1.3623e-05	-0.271756	0	0.208	0.3935
ASPH	1.0767e-07	-0.271706	0.047	0.438	0.00311005
FADS3	0.000323332	-0.271661	0	0.146	1
CCZ1	1.52859e-08	-0.271653	0.024	0.417	0.000441534
C1S	3.00603e-07	-0.27156	0.094	0.562	0.00868293
PBX3	9.9004e-05	-0.271555	0.035	0.271	1
ZNF688	4.71294e-06	-0.271537	0.035	0.333	0.136133
YPEL5	1.51242e-10	-0.271124	0.082	0.667	4.36864e-06
MID1	3.7203e-05	-0.270932	0.012	0.229	1
PDCD6IP	7.25858e-05	-0.270843	0.035	0.271	1
DYNC1I2	5.14546e-10	-0.270584	0.094	0.688	1.48626e-05
SP3	1.3623e-05	-0.270574	0	0.208	0.3935
CHD3	1.70346e-07	-0.270515	0.012	0.333	0.00492043
SMAP1	4.2284e-07	-0.27044	0.024	0.354	0.0122137
ARL4C	0.000897332	-0.270408	0.047	0.25	1
RSF1	3.84755e-07	-0.270385	0.047	0.417	0.0111137
TPGS1	1.2344e-07	-0.270244	0.059	0.479	0.00356556
SNUPN	1.3623e-05	-0.270196	0	0.208	0.3935
ZNF593	2.11007e-06	-0.269942	0.035	0.354	0.0609495
GNL1	6.1592e-07	-0.26981	0.035	0.375	0.0177908
ZBTB8A	0.0135604	-0.269806	0.012	0.104	1
IFRD1	4.50002e-06	-0.269732	0.012	0.271	0.129983
SRSF6	6.0888e-06	-0.269615	0.035	0.333	0.175875
SF3B2	3.59196e-05	-0.269602	0.106	0.458	1
PRPF4B	4.62265e-09	-0.269302	0.047	0.5	0.000133525
SHPRH	4.64334e-06	-0.269116	0	0.229	0.134123
ATP5B	1.5329e-06	-0.269055	0.224	0.812	0.0442779
ABCC9	5.19853e-07	-0.268707	0	0.271	0.015016
GATA6	3.95246e-05	-0.268488	0	0.188	1
VCP	2.05735e-09	-0.26842	0.071	0.562	5.94265e-05
FAM8A1	3.02826e-05	-0.268406	0.012	0.229	0.874713
RAD9A	0.000280622	-0.268166	0.012	0.188	1
SREBF2	3.95246e-05	-0.268002	0	0.188	1
SLC25A25	1.3623e-05	-0.267929	0	0.208	0.3935
RP11-701P16.5	0.000323332	-0.267658	0	0.146	1
CYB5A	4.64209e-09	-0.267653	0.094	0.646	0.000134087
COMMD2	4.64334e-06	-0.267581	0	0.229	0.134123
DDB1	1.50636e-06	-0.267474	0.035	0.354	0.0435111
AKT2	1.56367e-06	-0.267372	0	0.25	0.0451666
BRD2	2.402e-06	-0.267276	0.024	0.312	0.0693817
IAH1	1.21794e-08	-0.266981	0.059	0.5	0.000351801
TMEM56	3.95246e-05	-0.266949	0	0.188	1
CDK2AP1	4.64334e-06	-0.266823	0	0.229	0.134123
BPHL	3.95246e-05	-0.266801	0	0.188	1
KTN1	3.75409e-09	-0.266733	0.188	0.917	0.000108437
IL15RA	0.000323332	-0.266629	0	0.146	1
IQCK	1.3623e-05	-0.266436	0	0.208	0.3935
PHLDB2	1.3623e-05	-0.266279	0	0.208	0.3935
BLCAP	8.64425e-06	-0.266182	0.024	0.292	0.249689
MAPK1IP1L	2.49913e-06	-0.265891	0.024	0.312	0.0721873
CDC42BPB	0.000248984	-0.265848	0.012	0.188	1
ATP6AP2	6.1909e-10	-0.26555	0.106	0.688	1.78824e-05
GORASP2	1.53302e-06	-0.265397	0.012	0.292	0.0442813
SYNJ2	2.9054e-05	-0.265258	0.012	0.229	0.839224
USP31	3.95246e-05	-0.265098	0	0.188	1
GSTA4	6.84911e-06	-0.264818	0.024	0.292	0.197836
TMEM59	9.87523e-07	-0.264761	0.247	0.875	0.0285246
C14orf159	7.57424e-05	-0.264723	0.012	0.208	1
MYC	0.00011353	-0.264646	0	0.167	1
CFDP1	2.38998e-08	-0.264621	0.094	0.604	0.000690346
TM2D1	1.07104e-07	-0.264605	0.035	0.417	0.00309369
LTBR	2.402e-06	-0.26425	0.024	0.312	0.0693817
IRF3	0.000149798	-0.264226	0.024	0.229	1
SEC31A	5.55192e-08	-0.26422	0.012	0.354	0.00160367
OXR1	9.0004e-06	-0.264164	0.035	0.312	0.259977
CS	4.50002e-06	-0.264162	0.012	0.271	0.129983
EVI5	2.58007e-05	-0.264107	0.047	0.333	0.745252
PDCD7	4.3143e-06	-0.264096	0.012	0.271	0.124618
U2SURP	2.02021e-10	-0.263728	0.035	0.521	5.83536e-06
ING3	0.00506568	-0.26355	0.012	0.125	1
ITPK1	2.50416e-08	-0.263523	0.024	0.396	0.000723328
CCND1	0.000313242	-0.263511	0.035	0.25	1
DNPH1	9.39257e-07	-0.263055	0.118	0.583	0.0271304
BCL6	4.64334e-06	-0.263032	0	0.229	0.134123
JOSD1	1.56367e-06	-0.262981	0	0.25	0.0451666
ACAP2	9.56728e-05	-0.262947	0.035	0.271	1
TRIP11	1.53302e-06	-0.26261	0.012	0.292	0.0442813
PDGFRA	3.95246e-05	-0.262581	0	0.188	1
XPC	9.28911e-05	-0.26245	0.012	0.208	1
NUPL2	5.14807e-07	-0.262369	0.012	0.312	0.0148702
WSB2	5.31055e-05	-0.262122	0.024	0.25	1
SPRY1	0.00301204	-0.262092	0.024	0.167	1
THAP7	1.30265e-05	-0.262084	0.012	0.25	0.37627
IMMT	8.63029e-05	-0.262008	0.035	0.271	1
TPI1	1.99491e-07	-0.261905	0.247	0.896	0.00576231
ARHGDIA	1.16762e-06	-0.261841	0.071	0.458	0.0337268
TIMM10	1.56418e-06	-0.261753	0.035	0.354	0.0451812
TMEM131	2.78728e-05	-0.261519	0.012	0.229	0.805106
EBP	7.43389e-08	-0.261472	0.059	0.479	0.00214728
MIS18BP1	0.000660491	-0.261316	0.012	0.167	1
TMEM245	5.19853e-07	-0.261037	0	0.271	0.015016
JADE1	0.000914838	-0.260974	0	0.125	1
PLA2G12A	1.30265e-05	-0.260868	0.012	0.25	0.37627
EIF4G3	9.72026e-06	-0.260658	0.012	0.25	0.28077
FILIP1L	3.22866e-07	-0.260564	0.106	0.583	0.00932598
ASPSCR1	0.00116869	-0.260494	0.024	0.188	1
TMEM101	0.00011353	-0.260482	0	0.167	1
TM7SF2	1.53302e-06	-0.260481	0.012	0.292	0.0442813
NIPBL	1.92228e-05	-0.260453	0.024	0.271	0.55525
TRAPPC2P1	2.94246e-06	-0.260403	0.012	0.271	0.0849929
PSMD6	9.5892e-08	-0.260328	0.059	0.479	0.00276984
PUM1	2.3085e-06	-0.260225	0.024	0.312	0.066681
HSF4	0.000914838	-0.259996	0	0.125	1
C1orf123	1.75172e-07	-0.259897	0.047	0.438	0.00505985
C1orf213	0.000914838	-0.259854	0	0.125	1
SMTN	4.94741e-05	-0.25951	0.035	0.292	1
HOMER3	4.64334e-06	-0.259214	0	0.229	0.134123
TRAPPC3	3.83109e-10	-0.259201	0.071	0.625	1.10661e-05
COL4A3BP	3.20531e-06	-0.258864	0.012	0.271	0.0925854
MESDC2	5.14807e-07	-0.258703	0.012	0.312	0.0148702
MME	0.000167132	-0.258694	0.024	0.229	1
METTL7A	3.19972e-07	-0.25847	0.047	0.417	0.0092424
ITGA1	4.2284e-07	-0.258214	0.024	0.354	0.0122137
CWF19L2	3.7203e-05	-0.258128	0.012	0.229	1
KCNK1	1.3623e-05	-0.258081	0	0.208	0.3935
ORAI1	8.56326e-05	-0.258032	0.012	0.208	1
CHST11	4.64334e-06	-0.257998	0	0.229	0.134123
STAM	3.95246e-05	-0.257853	0	0.188	1
NPEPPS	1.42168e-07	-0.257708	0.024	0.375	0.00410653
C1orf52	9.31914e-06	-0.257551	0.012	0.25	0.269183
RAMP2	4.50002e-06	-0.257508	0.012	0.271	0.129983
TMEM47	5.14807e-07	-0.257453	0.012	0.312	0.0148702
GBA2	3.95246e-05	-0.25715	0	0.188	1
DRAM2	2.30093e-07	-0.257093	0.035	0.396	0.00664625
PCDH7	4.2284e-07	-0.256902	0.024	0.354	0.0122137
MMD	0.000280622	-0.256892	0.012	0.188	1
MYO10	3.95246e-05	-0.256498	0	0.188	1
PLCB1	0.00011353	-0.256479	0	0.167	1
ALDH1A2	1.78202e-07	-0.256462	0.071	0.5	0.00514737
SMARCD1	3.95246e-05	-0.256434	0	0.188	1
ALG14	4.64334e-06	-0.256393	0	0.229	0.134123
ING1	1.3623e-05	-0.256046	0	0.208	0.3935
IGF1R	0.00011353	-0.256041	0	0.167	1
PRKAG2	4.50002e-06	-0.255949	0.012	0.271	0.129983
PDCD6	1.00933e-06	-0.255653	0.094	0.5	0.0291545
HNRNPUL1	0.000109667	-0.25559	0.035	0.271	1
PTTG1IP	3.56419e-09	-0.255583	0.118	0.708	0.000102952
UBL7	1.30265e-05	-0.255571	0.012	0.25	0.37627
PBRM1	3.45707e-08	-0.255544	0.035	0.438	0.000998576
PSMG4	5.14807e-07	-0.255527	0.012	0.312	0.0148702
MIA3	0.000229786	-0.255468	0.012	0.188	1
SHC1	6.84911e-06	-0.255426	0.024	0.292	0.197836
MAGOH	1.161e-07	-0.255355	0.047	0.438	0.00335355
PARP1	3.59714e-08	-0.25525	0.035	0.438	0.00103903
CTSL	3.9725e-09	-0.255219	0.094	0.625	0.000114746
ZNF281	8.91921e-05	-0.255193	0.012	0.208	1
ENDOV	4.64334e-06	-0.255165	0	0.229	0.134123
SMG6	1.3623e-05	-0.254987	0	0.208	0.3935
CORO1B	1.74894e-09	-0.254936	0.012	0.417	5.05181e-05
GAA	1.42168e-07	-0.254742	0.024	0.375	0.00410653
NBN	1.70511e-07	-0.254736	0	0.292	0.00492522
RELA	3.57088e-05	-0.254535	0.012	0.229	1
TBC1D4	2.9054e-05	-0.254139	0.012	0.229	0.839224
RRP7A	1.08584e-05	-0.254126	0.047	0.354	0.313644
LYST	2.81367e-06	-0.254056	0.024	0.312	0.0812727
FXYD5	0.000443111	-0.254023	0.047	0.271	1
MAX	1.4526e-05	-0.253991	0.047	0.333	0.419584
MAPKAPK5	1.14246e-06	-0.253988	0.024	0.333	0.0329998
LPIN2	4.50002e-06	-0.25393	0.012	0.271	0.129983
MUL1	1.53302e-06	-0.253865	0.012	0.292	0.0442813
MRPS6	6.18802e-09	-0.253806	0.224	0.917	0.000178741
HLA-E	2.48005e-06	-0.253654	0.2	0.729	0.0716364
TPT1-AS1	0.00011353	-0.253454	0	0.167	1
AK3	3.11495e-09	-0.253318	0.071	0.583	8.99752e-05
NUMB	2.67374e-05	-0.253252	0.012	0.229	0.77231
PRLR	4.64334e-06	-0.25301	0	0.229	0.134123
TEAD1	3.7203e-05	-0.252672	0.012	0.229	1
MRPS35	1.45059e-06	-0.252637	0.035	0.354	0.0419003
RBM26	9.70256e-06	-0.252566	0.024	0.292	0.280259
SEPN1	7.89124e-05	-0.252535	0.012	0.208	1
ARGLU1	3.03849e-08	-0.252456	0.071	0.521	0.000877668
PLEKHB2	4.92595e-05	-0.25236	0.024	0.25	1
TMEM30A	1.30265e-05	-0.252249	0.012	0.25	0.37627
MGST1	1.62415e-06	-0.25217	0.071	0.458	0.0469137
BICD1	0.00011353	-0.251911	0	0.167	1
PTPN4	0.000323332	-0.25189	0	0.146	1
GULP1	9.78122e-07	-0.251785	0.059	0.438	0.0282531
ITGAV	1.68465e-07	-0.251713	0.035	0.396	0.00486612
NREP	2.35863e-06	-0.251599	0.035	0.354	0.0681291
DAP	0.000415069	-0.25158	0.024	0.208	1
CASC3	5.14807e-07	-0.251409	0.012	0.312	0.0148702
WBP2	2.31094e-08	-0.25131	0.059	0.5	0.000667514
FAF1	3.95246e-05	-0.251156	0	0.188	1
MITD1	2.13187e-06	-0.251002	0.024	0.312	0.0615791
SEMA3C	0.00011353	-0.250848	0	0.167	1
PQLC2	0.000323332	-0.250806	0	0.146	1
HSP90B1	7.34216e-07	-0.250737	0.129	0.604	0.0212078
POLR2B	0.000126488	-0.250684	0.047	0.292	1
RAB5B	1.00821e-05	-0.250663	0.024	0.292	0.29122
TNRC6C	3.95246e-05	-0.250633	0	0.188	1
NECAP2	2.67374e-05	-0.250573	0.012	0.229	0.77231
TCTEX1D2	1.30265e-05	-0.250561	0.012	0.25	0.37627
SMS	5.9004e-07	-0.250462	0.153	0.667	0.0170433
IGFBP6	1.14246e-06	-0.250459	0.024	0.333	0.0329998
CTNNBL1	0.000653816	-0.25044	0.035	0.229	1
YEATS4	1.56367e-06	-0.250297	0	0.25	0.0451666
ZDHHC4	0.00436015	0.250119	0.094	0.312	1
LAMTOR2	0.00364545	0.250442	0.165	0.458	1
NDUFS5	0.74156	0.251046	0.565	0.958	1
FN1	0.0930522	0.251512	0.153	0.312	1
CAPZA1	0.0205366	0.252081	0.118	0.312	1
ITGB3BP	0.0666426	0.252263	0.047	0.146	1
RHNO1	0.0279504	0.252536	0.035	0.146	1
ENSA	0.0202687	0.252672	0.212	0.5	1
PMPCB	0.00117278	0.25291	0.082	0.333	1
PPM1A	0.00942681	0.252937	0.071	0.25	1
SLC25A3	0.42349	0.253466	0.494	0.958	1
CHURC1	4.25796e-06	0.253731	0.129	0.562	0.122991
PSMG1	0.0107654	0.253896	0.082	0.271	1
POMGNT1	0.00311395	0.254098	0.024	0.167	1
OCIAD1	1.90158e-05	0.254224	0.153	0.604	0.549272
COPS8	0.00420422	0.254335	0.282	0.708	1
ANXA11	0.000102732	0.254692	0.165	0.583	1
EXT2	0.0319862	0.254907	0.047	0.167	1
NT5C3B	0.00520426	0.254977	0.106	0.333	1
ALG8	0.00921777	0.255045	0.024	0.146	1
PARP2	0.254062	0.25507	0.047	0.104	1
COQ5	0.0319862	0.255103	0.047	0.167	1
CD74	0.401026	0.255533	0.694	0.979	1
GADD45GIP1	1.8097e-06	0.256574	0.176	0.729	0.052273
SWI5	0.0619261	0.256663	0.035	0.125	1
MRPL20	3.67391e-06	0.256818	0.165	0.688	0.106121
BAX	0.000105348	0.257605	0.153	0.562	1
G6PC3	0.000303257	0.258023	0.059	0.312	1
CEBPZ-AS1	0.000470176	0.258456	0.082	0.354	1
CAPN1	0.00117278	0.258717	0.082	0.333	1
CAMLG	1.27517e-06	0.259444	0.176	0.729	0.0368333
MRPL12	0.00438431	0.259974	0.106	0.333	1
ERGIC1	0.0307707	0.259995	0.071	0.208	1
GOLGA7	0.00293815	0.260103	0.106	0.354	1
PDHB	0.00984633	0.260773	0.094	0.292	1
METTL9	0.000746787	0.260949	0.153	0.5	1
TMEM261	1.48981e-05	0.261279	0.165	0.646	0.430331
SLC25A5	0.00696962	0.261326	0.353	0.854	1
FAM127A	1.72973e-05	0.261567	0.106	0.5	0.499631
PLEK	0.41528	0.261605	0.059	0.104	1
TRAPPC4	0.0370332	0.26168	0.071	0.208	1
IMP3	0.00372431	0.261858	0.094	0.312	1
COX5A	0.000596756	0.262041	0.235	0.708	1
TMEM134	0.00208678	0.26216	0.071	0.292	1
HSBP1	0.000147644	0.262301	0.224	0.708	1
RETN	0.0120056	0.262375	0.106	0.312	1
SSBP4	0.000380727	0.262422	0.082	0.354	1
ACBD6	0.00160172	0.262535	0.059	0.271	1
EIF2B1	0.0619261	0.262689	0.035	0.125	1
MTHFD2L	0.00123932	0.263302	0.047	0.25	1
RPS19	0.015827	0.263589	0.929	1	1
USF2	0.00198369	0.263662	0.071	0.292	1
MAEA	0.0619261	0.264238	0.035	0.125	1
C6orf89	0.0167213	0.264276	0.059	0.208	1
HMOX2	0.00229895	0.264295	0.059	0.25	1
ARL3	0.000549739	0.264341	0.082	0.354	1
EBPL	0.0172018	0.264392	0.071	0.229	1
CALM1	0.494009	0.264506	0.529	0.938	1
CAPZA2	0.00952096	0.264577	0.247	0.604	1
MPC1	1.38285e-05	0.264592	0.176	0.667	0.399435
ACOT9	0.133308	0.264617	0.047	0.125	1
NKIRAS2	0.0308277	0.264645	0.059	0.188	1
ZFAS1	0.00213016	0.265047	0.329	0.854	1
DCAF6	0.0604322	0.265098	0.082	0.208	1
ACTB	0.115992	0.265406	0.965	1	1
SHFM1	0.00138474	0.265542	0.318	0.854	1
TMSB10	0.0965095	0.265845	0.824	1	1
HNRNPC	0.00010172	0.266082	0.2	0.667	1
TMA7	0.0966845	0.266275	0.412	0.917	1
LYPLA1	0.000159966	0.266414	0.071	0.354	1
ZMAT5	0.00367224	0.267092	0.024	0.167	1
SCML1	0.0542228	0.267556	0.024	0.104	1
CHMP3	0.000240196	0.267843	0.212	0.646	1
CCDC85B	3.01288e-05	0.267892	0.129	0.542	0.870269
PSMC3	6.09602e-05	0.267903	0.165	0.583	1
COMMD9	0.0327488	0.26814	0.071	0.208	1
NDUFB6	4.13938e-05	0.268155	0.212	0.729	1
CHORDC1	0.0284	0.268297	0.047	0.167	1
PPA2	0.000936888	0.268609	0.129	0.438	1
FAM136A	0.0100872	0.268802	0.082	0.271	1
HADH	9.56645e-05	0.269233	0.094	0.417	1
BCL7C	0.000844324	0.269327	0.082	0.333	1
RAP1GDS1	0.0619261	0.269432	0.035	0.125	1
MRAS	0.125401	0.269532	0.094	0.208	1
RFC2	0.0279504	0.269555	0.035	0.146	1
BROX	0.00665957	0.269846	0.047	0.208	1
TMEM43	0.133308	0.270439	0.047	0.125	1
RPS17	0.130213	0.27095	0.082	0.188	1
NDUFC2	0.00355299	0.271345	0.341	0.896	1
DPH3	0.0191814	0.271824	0.071	0.229	1
OCIAD2	0.00606569	0.272313	0.094	0.312	1
CRBN	0.00369305	0.272422	0.059	0.25	1
CSNK2B	0.000244031	0.27249	0.176	0.583	1
PRDX1	0.115376	0.272497	0.471	1	1
RP11-332H18.4	0.0619261	0.272732	0.035	0.125	1
TTC8	0.131975	0.272937	0.035	0.104	1
FRG1	0.000529892	0.273397	0.118	0.438	1
BCAP31	0.00433882	0.273728	0.188	0.521	1
SYNJ2BP	0.00369305	0.273949	0.059	0.25	1
GNPDA1	0.00257201	0.274072	0.106	0.354	1
NSFL1C	0.00453743	0.274363	0.082	0.292	1
CD27-AS1	0.0351595	0.274644	0.059	0.188	1
TMEM106C	0.00220609	0.275976	0.118	0.396	1
AKIP1	0.000943407	0.275981	0.071	0.312	1
LYRM5	0.00013469	0.276135	0.071	0.354	1
C12orf44	0.00593559	0.276213	0.094	0.312	1
DDOST	0.000943407	0.276494	0.071	0.312	1
PLEC	0.0258324	0.276606	0.035	0.146	1
MMP24-AS1	0.00176493	0.277067	0.176	0.521	1
SDHAF2	0.000515441	0.278166	0.047	0.271	1
PPP1R7	0.000767666	0.278279	0.118	0.417	1
CD163	0.245212	0.278527	0.047	0.104	1
GFER	0.0312395	0.278705	0.047	0.167	1
PSME2	0.00119538	0.279046	0.212	0.625	1
ACAT1	0.000476571	0.279361	0.153	0.521	1
ARL6IP4	0.00801349	0.281214	0.341	0.833	1
ESF1	0.00945417	0.28143	0.118	0.333	1
AIG1	0.00865061	0.281528	0.082	0.271	1
STX4	0.00357708	0.281703	0.106	0.354	1
ARPC1B	0.0177513	0.281823	0.224	0.542	1
KDELR2	0.000118484	0.281866	0.141	0.521	1
ZFYVE21	0.00012882	0.283065	0.188	0.625	1
RENBP	0.0322177	0.283284	0.059	0.188	1
TJP2	0.0619261	0.283452	0.035	0.125	1
EIF3F	0.00831536	0.283936	0.353	0.854	1
MOSPD1	0.0415345	0.28453	0.106	0.271	1
AMZ2	0.00123932	0.28501	0.047	0.25	1
CYB5R3	0.000564601	0.285196	0.235	0.688	1
BID	0.133308	0.285591	0.047	0.125	1
ATP6V1C1	0.00160172	0.285648	0.059	0.271	1
C14orf2	0.50445	0.28597	0.506	0.917	1
MRPL24	0.000370738	0.286124	0.082	0.354	1
NDUFV2	0.000647481	0.286437	0.247	0.708	1
ZCRB1	0.000644715	0.286611	0.188	0.583	1
GS1-251I9.4	6.62966e-05	0.286627	0.082	0.396	1
FAM92A1	0.0183668	0.28674	0.071	0.229	1
LMAN2	0.00092136	0.286743	0.176	0.542	1
UQCR11.1	0.994296	0.286821	0.553	0.896	1
CCDC28B	0.3311	0.286854	0.082	0.146	1
PLGRKT	0.00678357	0.287359	0.059	0.229	1
RABGGTB	0.00806721	0.287873	0.059	0.229	1
WDR18	0.0137412	0.288697	0.047	0.188	1
PSMC5	3.5828e-05	0.289237	0.176	0.625	1
ATXN10	5.67044e-06	0.290769	0.059	0.396	0.163791
SLIRP	0.0200627	0.290846	0.341	0.771	1
EIF4A2	0.0138379	0.290888	0.412	0.938	1
COX7C	0.120301	0.291073	0.871	1	1
MTCH2	6.90078e-06	0.291449	0.165	0.667	0.199329
LYAR	0.0148227	0.291966	0.047	0.188	1
OAT	0.00146025	0.293663	0.094	0.354	1
NDUFA6	7.49871e-07	0.294096	0.235	0.875	0.02166
VDAC1	6.16101e-05	0.294326	0.153	0.583	1
MLST8	0.0130595	0.294339	0.047	0.188	1
CMC1	0.000815633	0.294376	0.094	0.354	1
PPIB	0.00159977	0.294533	0.329	0.854	1
ZSCAN16-AS1	0.00763817	0.294576	0.188	0.479	1
NOP56	0.00942681	0.295079	0.071	0.25	1
PSMA7	0.0486612	0.295717	0.412	0.917	1
RABIF	0.0171141	0.296056	0.059	0.208	1
UCHL3	0.00865061	0.296225	0.082	0.271	1
CEBPZ	0.00232406	0.296866	0.047	0.229	1
TMEM219	0.00128717	0.296956	0.235	0.667	1
RPL28	0.0644142	0.2982	0.835	1	1
SMIM1	0.131975	0.29833	0.035	0.104	1
ADSL	0.129211	0.298708	0.071	0.167	1
ATP5G1	2.55991e-05	0.299396	0.176	0.667	0.739431
COX14	0.00441461	0.300098	0.282	0.708	1
C4orf27	0.00108791	0.300652	0.082	0.333	1
HNRNPU	0.000827871	0.30104	0.165	0.521	1
NUPR1	0.456856	0.301684	0.776	0.958	1
CBWD1	0.182693	0.301701	0.094	0.188	1
EIF1B	0.00026222	0.30176	0.2	0.625	1
EIF2S3	0.0624849	0.302681	0.176	0.375	1
SH3YL1	0.0319862	0.302838	0.047	0.167	1
MSRB1	0.00208678	0.303282	0.071	0.292	1
EML4	0.0688317	0.303791	0.106	0.25	1
PTPLA	0.0355548	0.30474	0.071	0.208	1
TMEM183A	0.00475176	0.305028	0.082	0.292	1
RPS3	0.0393976	0.305144	0.859	0.979	1
ENO1	0.0010412	0.306049	0.282	0.792	1
TMEM9	2.27553e-05	0.306067	0.141	0.583	0.657287
ZNHIT1	0.00153737	0.30719	0.271	0.729	1
SNRPE	0.00486446	0.307286	0.282	0.708	1
C1QC	0.0666217	0.30754	0.118	0.271	1
PYURF	5.80561e-05	0.307574	0.235	0.771	1
GSTM3	0.00137928	0.307732	0.176	0.542	1
EXOSC3	0.254062	0.307733	0.047	0.104	1
EEF1D	0.791377	0.308317	0.553	0.896	1
POLR3E	0.00582662	0.309293	0.047	0.208	1
PIGH	0.0351595	0.309375	0.059	0.188	1
VAMP3	0.0110877	0.309676	0.106	0.312	1
PHB	0.00187224	0.309972	0.212	0.604	1
PARP9	0.0661733	0.310432	0.082	0.208	1
HIGD2A	0.000761655	0.311015	0.294	0.812	1
LYPLAL1	0.000290836	0.311445	0.176	0.583	1
TIMM10B	0.000416088	0.312464	0.071	0.333	1
CD82	0.000345566	0.313087	0.035	0.25	1
APOPT1	0.0107654	0.31361	0.082	0.271	1
NAP1L5	0.0122134	0.31365	0.035	0.167	1
PEA15	0.196234	0.314639	0.082	0.167	1
HSP90AB1	0.00250491	0.315177	0.318	0.833	1
SCNM1	0.0171141	0.315284	0.059	0.208	1
CDC26	0.269528	0.31537	0.129	0.229	1
CXCR4	0.241179	0.315904	0.059	0.125	1
COPZ1	0.000542505	0.316038	0.118	0.438	1
LLPH	0.0171141	0.316317	0.059	0.208	1
ARPC2	0.110711	0.316321	0.412	0.875	1
HRSP12	0.071874	0.316515	0.071	0.188	1
RPL19	0.0210285	0.316818	0.929	1	1
EIF3I	4.60079e-05	0.318062	0.129	0.521	1
MAPRE1	0.0039259	0.318163	0.129	0.396	1
EVI2A	0.392206	0.318201	0.059	0.104	1
RPS28	0.00249133	0.318209	0.918	1	1
FAM120AOS	0.0341272	0.318213	0.071	0.208	1
SVIP	0.0121497	0.318416	0.129	0.354	1
PRDX6	0.015619	0.318644	0.341	0.792	1
EIF3J	0.000579156	0.318718	0.106	0.396	1
TPGS2	0.00416486	0.319759	0.165	0.458	1
SEL1L	0.0319862	0.319944	0.047	0.167	1
NDUFB4	0.00328232	0.320143	0.341	0.896	1
TFAM	0.0319862	0.320467	0.047	0.167	1
WDR83OS	4.44792e-05	0.320683	0.235	0.792	1
ZNHIT3	0.00164553	0.321746	0.059	0.271	1
CCDC53	0.000264401	0.321945	0.106	0.417	1
PDLIM4	0.00810852	0.322289	0.153	0.417	1
UQCRB	0.338362	0.322349	0.706	0.958	1
MVP	7.32877e-05	0.322635	0.071	0.375	1
GLIPR2	0.000426734	0.322813	0.153	0.521	1
LSM4	5.06994e-05	0.32293	0.153	0.583	1
PARVB	0.00921777	0.323685	0.024	0.146	1
IFI27L2	0.000699687	0.324112	0.224	0.646	1
NOL12	0.133308	0.325131	0.047	0.125	1
THOC6	0.0666485	0.325404	0.071	0.188	1
SERF2	0.0069238	0.326952	0.835	0.979	1
OAZ1	0.758769	0.32701	0.612	0.979	1
RPS18	0.0850847	0.327191	0.906	1	1
CAMTA1	0.00103071	0.32759	0.224	0.646	1
RPS27A	0.0467159	0.328922	0.929	1	1
PLCD3	0.0319862	0.329548	0.047	0.167	1
SLC9A3R2	0.254062	0.329847	0.047	0.104	1
PRKAG1	0.116225	0.330775	0.106	0.229	1
FAM104B	0.127006	0.331032	0.071	0.167	1
TRPT1	0.0696973	0.331268	0.059	0.167	1
RPS27L	0.714447	0.331779	0.635	0.958	1
RPS7	0.137717	0.331805	0.812	0.979	1
ANP32A	0.000685839	0.332046	0.106	0.396	1
SERPINA1	0.149979	0.332309	0.188	0.354	1
FBP1	0.0083689	0.332459	0.141	0.396	1
DNAJC15	0.00259453	0.332468	0.129	0.396	1
UQCR10	0.0828238	0.332637	0.376	0.771	1
LYRM2	0.000357472	0.332955	0.094	0.375	1
ATP5G2	0.776169	0.333147	0.518	0.917	1
GLUL	0.224739	0.333221	0.365	0.667	1
LRR1	0.131975	0.333344	0.035	0.104	1
APIP	0.00566413	0.334027	0.106	0.333	1
MRPL21	2.23531e-05	0.334699	0.118	0.521	0.645668
FXR1	0.000376878	0.334713	0.129	0.458	1
PTRHD1	0.00080066	0.335322	0.129	0.438	1
UBE2N	0.000647555	0.33905	0.176	0.542	1
C7orf55-LUC7L2	0.0148227	0.339127	0.047	0.188	1
UROS	0.00350032	0.339195	0.106	0.354	1
CCT8	0.000989756	0.339386	0.188	0.562	1
AK1	4.94612e-06	0.339413	0.071	0.438	0.142869
MPC2	0.000618733	0.339473	0.188	0.583	1
THEMIS2	0.212905	0.339922	0.071	0.146	1
EIF1	0.243168	0.340693	0.847	1	1
ERH	0.0214433	0.342074	0.329	0.792	1
IFITM3	0.564217	0.342736	0.506	0.917	1
FABP3	0.000886266	0.343109	0.153	0.5	1
HNRNPF	0.000487168	0.343681	0.153	0.521	1
LIMCH1	0.0542228	0.343702	0.024	0.104	1
CYCS	0.00674241	0.343986	0.306	0.75	1
NUCB2	0.0164709	0.344033	0.176	0.438	1
ANXA7	0.00133271	0.344386	0.129	0.438	1
MAP4K5	0.0415345	0.344606	0.106	0.271	1
RBM3	2.99881e-05	0.344645	0.2	0.708	0.866207
EEF1B2	0.0506506	0.345492	0.388	0.875	1
APOL2	0.062677	0.346056	0.082	0.208	1
MAPKAP1	0.0014037	0.346616	0.165	0.5	1
S100A10	0.057959	0.347277	0.306	0.646	1
METAP2	0.00104126	0.348018	0.176	0.542	1
UQCC2	0.00435249	0.34818	0.247	0.646	1
RHOD	0.120974	0.348493	0.059	0.146	1
MCM3	0.0666426	0.348597	0.047	0.146	1
SURF1	0.00208678	0.349593	0.071	0.292	1
TGFB1I1	0.00645474	0.349614	0.212	0.562	1
CLU	0.163975	0.349627	0.435	0.792	1
MRPL42	0.0211156	0.349724	0.082	0.25	1
NME1	0.00281113	0.349926	0.106	0.354	1
MRPL2	0.0610613	0.349992	0.129	0.292	1
NSMCE2	0.576127	0.350098	0.071	0.104	1
LGALS9	0.211408	0.350449	0.082	0.167	1
IER3IP1.1	0.0110523	0.351093	0.118	0.333	1
RPLP2	0.00448645	0.35162	0.906	1	1
LYRM1	0.0372402	0.35224	0.094	0.25	1
ALG3	0.22579	0.352806	0.059	0.125	1
LINC00493	0.000434157	0.3532	0.235	0.729	1
CNDP2	0.116112	0.354539	0.082	0.188	1
ANAPC11	1.77054e-05	0.355547	0.212	0.75	0.51142
NKG7	0.549652	0.356839	0.071	0.104	1
VAMP8	0.128104	0.357276	0.176	0.354	1
TWF2	0.024442	0.3574	0.106	0.292	1
AMD1	0.00704782	0.358195	0.129	0.375	1
TAX1BP3	0.00199775	0.35841	0.247	0.688	1
RAB10	0.00141934	0.358676	0.118	0.396	1
TREM1	0.96374	0.360156	0.094	0.104	1
AP2M1	0.0114102	0.360941	0.341	0.854	1
MRPL22	0.00129564	0.361004	0.106	0.375	1
BCYRN1	0.132694	0.362637	0.059	0.146	1
TEN1	0.237265	0.362713	0.059	0.125	1
MS4A4A	0.373022	0.363037	0.071	0.125	1
SNAPC5	0.0415345	0.363082	0.106	0.271	1
KIAA1191	0.0696973	0.363085	0.059	0.167	1
NDUFA1	0.483304	0.363108	0.506	0.917	1
CYB561D2	0.24961	0.363158	0.047	0.104	1
RPL36	0.00377494	0.363347	0.871	0.979	1
TUBB4B	0.0387232	0.363458	0.106	0.271	1
POLR2K	0.00164293	0.364588	0.212	0.604	1
DAP3	0.00712366	0.364651	0.106	0.333	1
RXRB	0.0666426	0.364762	0.047	0.146	1
STRA13	0.00384682	0.364882	0.129	0.396	1
GOSR2	0.41528	0.365755	0.059	0.104	1
SNX7	0.230079	0.36581	0.071	0.146	1
CCDC82	0.0377917	0.368343	0.071	0.208	1
ALOX5	0.0351595	0.368359	0.059	0.188	1
NACA	0.10423	0.36849	0.753	0.979	1
PFDN5	0.71558	0.369991	0.612	0.938	1
AAMDC	0.00162907	0.371286	0.141	0.458	1
B9D1	0.131975	0.371928	0.035	0.104	1
CLTB	0.000454322	0.372427	0.235	0.688	1
IDH3B	0.00255683	0.372822	0.224	0.604	1
ARL4A	0.169769	0.374066	0.118	0.229	1
RPF2	0.06463	0.374225	0.094	0.229	1
RPS2	0.00541688	0.375631	0.882	1	1
TAF12	0.0401197	0.376139	0.082	0.229	1
RPS26	0.11184	0.376278	0.741	0.979	1
RPS10	0.00221619	0.377013	0.824	0.979	1
SREK1IP1	0.00590623	0.378247	0.129	0.375	1
C15orf40	0.22957	0.378286	0.059	0.125	1
EIF3G	0.0127798	0.378518	0.271	0.646	1
FAM96A	0.322746	0.379516	0.106	0.188	1
PAXIP1-AS1	0.41528	0.379598	0.059	0.104	1
VPS28	9.33152e-05	0.3803	0.224	0.729	1
RPS5	0.0418725	0.380656	0.694	0.979	1
RBMX	0.000267239	0.382067	0.247	0.729	1
MPHOSPH6	0.00944737	0.382143	0.082	0.271	1
ITGB2	0.505813	0.382234	0.094	0.146	1
GABARAP	0.115688	0.382235	0.4	0.812	1
RP11-108M9.4	0.230079	0.382575	0.071	0.146	1
EIF5A	0.010113	0.382648	0.271	0.667	1
CCNG1	0.0176929	0.383595	0.247	0.604	1
NCF2	0.190446	0.383698	0.071	0.146	1
UFC1	0.00406896	0.383966	0.235	0.625	1
HINT2	0.00327894	0.384237	0.106	0.354	1
CHMP4A	0.00308473	0.384589	0.094	0.333	1
COTL1	0.0129588	0.385065	0.294	0.688	1
CD151	0.0498237	0.385286	0.318	0.688	1
NOP10	0.00885184	0.385928	0.306	0.75	1
PHF23	0.133308	0.386194	0.047	0.125	1
THOC7	0.000788187	0.38757	0.141	0.479	1
MYL12B	0.0146762	0.387991	0.353	0.812	1
TMEM176A	0.00182742	0.38803	0.106	0.375	1
DGCR6L	0.028001	0.388079	0.224	0.521	1
C16orf13	0.00618168	0.388248	0.141	0.396	1
ACOT13	0.00251067	0.38878	0.094	0.333	1
TCEB2	0.68151	0.389083	0.518	0.938	1
SNRPF	0.000269192	0.389093	0.2	0.646	1
EBAG9	0.0211156	0.389327	0.082	0.25	1
C8orf33	0.21966	0.389376	0.071	0.146	1
C14orf1	0.000424004	0.389611	0.106	0.417	1
SERPINB6	0.00541111	0.389637	0.247	0.625	1
ROGDI	0.131975	0.389883	0.035	0.104	1
LAMTOR5	0.0064323	0.390259	0.294	0.75	1
GLRX	0.00884875	0.390592	0.141	0.396	1
MRPS21	0.007079	0.390827	0.282	0.729	1
CNIH1	0.00102893	0.392159	0.212	0.646	1
CCNI	0.323397	0.392751	0.635	0.875	1
CSTB	0.223238	0.393003	0.706	0.979	1
FAM200B	0.00170244	0.393172	0.2	0.562	1
EIF6	0.0194383	0.393775	0.118	0.312	1
MDH1	0.00207028	0.394651	0.247	0.667	1
COX4I1	0.305422	0.394964	0.671	0.958	1
ARV1	0.0351595	0.395594	0.059	0.188	1
CYP20A1	0.254062	0.396419	0.047	0.104	1
FAU	0.00852439	0.396754	0.824	0.979	1
COA5	0.0106561	0.397587	0.129	0.354	1
DMKN	0.00532206	0.397663	0.094	0.312	1
ATP5H	0.0674698	0.397806	0.353	0.75	1
RPL24	0.00615546	0.398199	0.882	0.958	1
FDX1	0.0293311	0.398296	0.141	0.354	1
TATDN1	0.116724	0.399352	0.129	0.271	1
PPDPF	0.0233484	0.399538	0.341	0.792	1
SFTPD	0.188054	0.399598	0.094	0.188	1
RPL39	0.0122659	0.40122	0.906	1	1
BRK1	0.0624465	0.401628	0.376	0.812	1
SUGT1	0.199872	0.401821	0.106	0.208	1
ANAPC13	0.0454363	0.401864	0.153	0.354	1
RPL36AL	0.954445	0.402184	0.541	0.938	1
GNLY	0.515637	0.402466	0.082	0.125	1
PPIC	9.20903e-05	0.403349	0.188	0.646	1
TBCA	0.0310588	0.403764	0.365	0.854	1
PKIG	0.123529	0.40442	0.376	0.729	1
ENY2	0.000258635	0.404589	0.212	0.667	1
RPL37	0.00876242	0.405499	0.824	0.979	1
RPS11	0.0330432	0.405769	0.812	0.979	1
RPL41	2.61331e-05	0.406017	0.976	1	0.754856
C19orf53	0.00880421	0.407216	0.341	0.812	1
NDUFS3	0.0133071	0.409772	0.188	0.479	1
PCBP2	0.0220113	0.409919	0.329	0.771	1
UBA52	0.0159856	0.410082	0.776	1	1
RPL37A	0.00332727	0.410255	0.882	1	1
PSMB1	0.000352058	0.410913	0.259	0.771	1
GSTP1	0.267882	0.411342	0.706	0.958	1
NUS1	0.122001	0.41164	0.082	0.188	1
PSMB10	0.582839	0.411825	0.071	0.104	1
NDUFB2	0.34567	0.412015	0.482	0.917	1
POMP	0.0713063	0.413363	0.4	0.875	1
VASP	0.0655238	0.414194	0.106	0.25	1
TMEM136	0.60319	0.41438	0.071	0.104	1
TALDO1	0.00118416	0.417557	0.188	0.562	1
RPS15	0.000108655	0.418165	0.894	1	1
TMEM126B	0.00298619	0.418245	0.2	0.542	1
RPS9	0.000840803	0.418423	0.882	0.979	1
BCAP29	0.00169636	0.41901	0.118	0.396	1
RNF130	0.00780875	0.419322	0.118	0.354	1
2021-09-02	0.00104955	0.419853	0.153	0.5	1
PAF1	0.132694	0.420508	0.059	0.146	1
RCN1	0.0229972	0.421087	0.094	0.271	1
DCTN6	0.0202759	0.421123	0.106	0.292	1
TRIM63	0.0135095	0.421325	0.106	0.312	1
NSA2	0.00757668	0.421682	0.259	0.625	1
PSMA2.1	6.85932e-05	0.422676	0.224	0.729	1
NDUFA12	0.00964427	0.424067	0.282	0.708	1
RPL7A	0.0142843	0.424683	0.812	1	1
HSPA2	0.0423175	0.425463	0.094	0.25	1
SEC13	0.0722755	0.425554	0.106	0.25	1
LY96	0.0090471	0.425758	0.129	0.375	1
RPL10	5.01634e-05	0.425798	0.976	1	1
ILKAP	0.358029	0.426108	0.082	0.146	1
RAB32	0.00602579	0.426194	0.153	0.417	1
GMPR2	0.0377917	0.426307	0.071	0.208	1
SERP1	0.0013148	0.426551	0.212	0.625	1
RPL13	0.00206586	0.42694	0.918	1	1
ARHGDIB	0.125	0.428233	0.176	0.354	1
AES	0.0124832	0.429025	0.224	0.562	1
LSMD1	0.00412291	0.429488	0.176	0.5	1
ALDH1B1	0.113898	0.430159	0.153	0.312	1
TMEM14C	0.0187153	0.431294	0.318	0.771	1
RPL26L1	0.00182742	0.432029	0.106	0.375	1
PFN1	0.0599148	0.43212	0.682	0.958	1
HLA-DRB5	0.0479909	0.432307	0.2	0.438	1
GYG1	0.0171755	0.432432	0.188	0.458	1
C19orf59	0.0162794	0.432934	0.129	0.354	1
YWHAH	0.000699791	0.433709	0.176	0.562	1
ACTR3	0.0727705	0.434085	0.294	0.604	1
TMSB4X	3.24718e-06	0.434677	1	1	0.0937947
KRT18	0.392206	0.435701	0.059	0.104	1
ANP32B	0.00317624	0.43592	0.176	0.5	1
CHCHD3	0.00312914	0.435934	0.118	0.375	1
IGSF6	0.478931	0.439076	0.094	0.146	1
KLRB1	0.0542228	0.439791	0.024	0.104	1
UBL5	0.817798	0.440243	0.482	0.792	1
UBE2L6	0.046864	0.440357	0.212	0.479	1
STAU1	0.00104699	0.44057	0.129	0.438	1
RPL29	0.00891981	0.442025	0.812	0.958	1
GSTO1	0.00856495	0.442355	0.306	0.792	1
RPS15A	0.000106665	0.44281	0.918	0.979	1
COX7A2L	0.0292993	0.443507	0.329	0.771	1
ETFA	0.00639321	0.444904	0.118	0.354	1
ATP5L	0.0723905	0.445073	0.741	0.979	1
RPL35A	0.00034658	0.445125	0.906	0.958	1
UQCRFS1	0.0146581	0.445322	0.318	0.75	1
RPL13A	3.8923e-06	0.445798	0.988	1	0.112429
SFTPA2	0.0722862	0.446089	0.306	0.646	1
NAPSA	0.0673738	0.448675	0.082	0.208	1
CAV1	0.353448	0.451958	0.082	0.146	1
RPL11	0.00353739	0.452967	0.906	1	1
BRMS1	0.0148227	0.455927	0.047	0.188	1
RPS14	3.97985e-06	0.456062	0.976	0.958	0.114958
MZT2B	0.0208469	0.457154	0.329	0.75	1
PDCD5	0.00203714	0.457891	0.188	0.562	1
PROSC	0.130213	0.458133	0.082	0.188	1
OST4	0.593912	0.458213	0.565	0.896	1
MTIF3	0.0179428	0.458605	0.212	0.5	1
STX8	0.000706798	0.458894	0.094	0.375	1
UXT	0.0569885	0.459	0.271	0.583	1
GUK1	0.0420873	0.45912	0.388	0.854	1
VPS29	0.00559935	0.459581	0.294	0.771	1
RPS29	0.00467368	0.459866	0.871	0.958	1
RPL15	3.62584e-05	0.460535	0.929	0.979	1
SH3BGRL	0.881354	0.461204	0.494	0.854	1
DDX42	0.0629382	0.461673	0.071	0.188	1
SNRPD2	0.236449	0.461934	0.424	0.812	1
TMA16	0.22091	0.462301	0.082	0.167	1
TMEM141	0.0201505	0.4624	0.129	0.333	1
RNASE1	0.378101	0.463168	0.071	0.125	1
NQO1	0.230079	0.463704	0.071	0.146	1
ARMCX1	0.0107654	0.464228	0.082	0.271	1
SCRG1	0.196234	0.464897	0.082	0.167	1
TSPO	0.395398	0.466484	0.4	0.729	1
TTC1	0.00612231	0.466584	0.153	0.438	1
TMEM218	0.230079	0.467342	0.071	0.146	1
MRPS15	0.0853587	0.468043	0.247	0.5	1
RPS27	0.000788087	0.46959	0.929	1	1
VTI1B	0.00251759	0.469873	0.153	0.458	1
EMC6	0.0466569	0.470322	0.176	0.396	1
RPS3A	0.000316108	0.470984	0.882	0.958	1
CCDC109B	0.241179	0.471329	0.059	0.125	1
EIF3L	0.203177	0.471875	0.412	0.812	1
CETN2	0.075362	0.472762	0.188	0.396	1
GPX1	0.538699	0.472887	0.459	0.812	1
RPS6	0.00134168	0.474127	0.953	1	1
RPS8	3.63016e-05	0.475464	0.965	1	1
PDLIM2	0.00791245	0.479502	0.141	0.396	1
ATP5J2	0.0332611	0.480135	0.329	0.75	1
PIN1	0.00681809	0.480152	0.188	0.5	1
CLTA	0.0311322	0.480183	0.412	0.896	1
SELM	0.902746	0.480342	0.518	0.875	1
RPL23A	0.000341362	0.481115	0.965	1	1
ANXA2	0.0289262	0.481194	0.259	0.604	1
VDAC3	0.0150672	0.481323	0.259	0.625	1
RPS16	0.00101099	0.482195	0.882	0.979	1
UBAC1	0.0152285	0.483454	0.059	0.208	1
SLC25A4	0.0155217	0.485873	0.2	0.5	1
NDUFC1	0.0156972	0.485889	0.306	0.729	1
SEC61G	0.0187998	0.487348	0.318	0.75	1
TSPAN2	0.00942681	0.4877	0.071	0.25	1
RPL9	8.44072e-05	0.48784	0.894	0.979	1
ANXA1	0.0619395	0.488011	0.224	0.479	1
RPL32	9.20207e-05	0.489337	0.882	0.979	1
CCL18	0.174693	0.489429	0.294	0.542	1
RPL3	0.000525067	0.491677	0.894	0.979	1
DYNLL1	0.432338	0.492343	0.435	0.792	1
RPL35	0.00273267	0.492883	0.835	0.958	1
LSM3	0.00125701	0.493616	0.235	0.688	1
TCEAL4	0.449984	0.493843	0.588	0.833	1
USP14	0.289822	0.49582	0.118	0.208	1
PCBD1	0.213594	0.496336	0.329	0.625	1
CCL4	0.171249	0.49661	0.106	0.042	1
CALM2	0.484321	0.498613	0.471	0.917	1
ATP5E	0.00262524	0.498971	0.776	0.917	1
C6orf1	0.00428803	0.500948	0.118	0.375	1
NPM1	0.582384	0.502092	0.588	0.938	1
HDDC2	0.00739223	0.502093	0.235	0.583	1
ARPC1A	0.00605006	0.505766	0.224	0.583	1
RPL6	0.000114137	0.507553	0.918	1	1
MRPL18	0.106538	0.507766	0.141	0.292	1
FTL	9.64988e-09	0.511373	1	1	0.000278737
RPL27A	0.000539941	0.512089	0.918	1	1
C12orf45	0.213619	0.517751	0.094	0.188	1
MYEOV2	0.00654118	0.518636	0.271	0.708	1
ATPIF1	0.145947	0.518741	0.4	0.833	1
RPL17	0.625353	0.51894	0.565	0.979	1
COX17	0.0454184	0.520861	0.341	0.75	1
RPL23	0.0019912	0.521452	0.859	0.958	1
MMADHC	0.00225449	0.523323	0.165	0.479	1
C1QB	0.57397	0.52394	0.388	0.604	1
USMG5	0.768223	0.525848	0.518	0.875	1
RPS12	0.000714907	0.528548	0.871	0.979	1
TXN	0.959872	0.529189	0.506	0.896	1
RPL5	0.00301033	0.531678	0.871	0.979	1
RPLP0	0.000991266	0.532137	0.776	0.958	1
GTF3A	0.0033774	0.535068	0.259	0.688	1
GNB2L1	0.000617897	0.536993	0.859	1	1
LYZ	0.514851	0.538885	0.529	0.812	1
RPS24	0.00018618	0.539623	0.882	1	1
ESD	0.000946575	0.54031	0.247	0.729	1
RAP1A	0.238699	0.541726	0.224	0.396	1
RPL10A	0.000343469	0.542302	0.894	0.979	1
UGP2	0.0259924	0.544244	0.294	0.688	1
COMMD6	0.98473	0.54491	0.518	0.896	1
ST3GAL4	0.0249868	0.546358	0.153	0.375	1
CCDC90B	0.102771	0.547099	0.129	0.271	1
EIF3E	0.812768	0.549642	0.506	0.917	1
C19orf70	0.0959498	0.553393	0.294	0.625	1
PLN	0.450081	0.556308	0.447	0.521	1
RPL27	0.000647814	0.556325	0.824	1	1
RPL21	2.33765e-07	0.557943	0.918	1	0.00675231
RPL34	3.00633e-07	0.558597	0.988	1	0.00868377
PSMA4	0.0550059	0.559015	0.341	0.771	1
POLR2L	0.848646	0.559961	0.482	0.833	1
RPLP1	9.86554e-08	0.560238	1	1	0.00284966
HBB	0.0313134	0.560326	0.141	0.354	1
LSM5	0.00730739	0.561172	0.188	0.5	1
ATP5I	0.803501	0.561207	0.518	0.896	1
RPL30	2.30399e-05	0.562051	0.929	0.979	0.665506
RPL18A	0.000398381	0.562259	0.847	1	1
FAM195A	0.0202759	0.562594	0.106	0.292	1
BAG1	0.0300607	0.563941	0.224	0.521	1
RPL36A	0.241519	0.565035	0.6	0.958	1
HSPB1	0.0567843	0.565397	0.706	0.917	1
GTF2H5	0.00858393	0.565726	0.2	0.521	1
SELK	0.00772022	0.566772	0.271	0.688	1
NDUFA4	0.00619001	0.568415	0.776	0.938	1
ATP5F1	0.096406	0.568595	0.294	0.604	1
HSD17B6	0.204225	0.568809	0.118	0.229	1
S100A11	0.453298	0.569157	0.565	0.792	1
NHP2	0.000496066	0.569267	0.224	0.667	1
C1QA	0.697437	0.569314	0.447	0.583	1
RPSA	0.0662898	0.570181	0.671	0.938	1
RPL14	3.43242e-05	0.570502	0.882	0.979	0.991455
FXYD1	0.00796321	0.576131	0.188	0.5	1
DSTN	0.00317253	0.57635	0.812	0.958	1
CISD1	0.0120888	0.577427	0.212	0.521	1
CIR1	0.0106525	0.578318	0.106	0.312	1
RPS20	2.94351e-08	0.578519	0.953	1	0.000850234
SRGN	0.461441	0.578747	0.212	0.333	1
HINT1	0.0540098	0.579785	0.647	0.896	1
HLA-DRA	0.0346957	0.581499	0.682	0.854	1
CES1	0.112539	0.583554	0.141	0.292	1
FABP5	0.0826129	0.583623	0.212	0.438	1
RPS23	4.18448e-05	0.584916	0.965	1	1
PTGES3	0.0107067	0.585804	0.282	0.708	1
GCHFR	0.046835	0.585829	0.153	0.354	1
RPS25	2.35448e-05	0.587242	0.847	0.979	0.68009
RAB4A	0.0638117	0.58762	0.141	0.312	1
RPSAP58	0.027482	0.588606	0.329	0.771	1
FABP4	0.282753	0.588842	0.412	0.792	1
RPL7	1.4299e-05	0.589757	0.894	0.979	0.413025
PRDX3	0.0852168	0.590114	0.224	0.458	1
TYROBP	0.666277	0.592494	0.435	0.729	1
BST2	0.669729	0.592496	0.118	0.104	1
MYLK	0.00689419	0.593507	0.871	0.854	1
HADHB	0.0159667	0.59541	0.224	0.542	1
NDUFA11	0.67574	0.5973	0.435	0.792	1
MFF	0.00352207	0.597761	0.165	0.479	1
RWDD1	0.185672	0.600219	0.376	0.75	1
HSPB11	0.193907	0.60286	0.141	0.271	1
PARK7	0.108167	0.603755	0.435	0.917	1
HSPB7	0.204225	0.608261	0.118	0.229	1
EEF1A1	8.02097e-08	0.609423	0.976	1	0.00231686
LETMD1	0.985492	0.610759	0.094	0.104	1
CCDC23	0.199337	0.612657	0.153	0.292	1
BTF3	0.0222917	0.615402	0.682	0.938	1
RPL26	1.47807e-06	0.617414	0.929	0.979	0.0426942
PTGER3	0.546612	0.617705	0.247	0.375	1
TOPORS-AS1	0.22091	0.618441	0.082	0.167	1
EIF3H	0.547097	0.624333	0.412	0.729	1
TOMM7	0.0241738	0.625047	0.659	0.917	1
TPM1	4.85611e-05	0.625189	0.918	0.833	1
CNN1	0.87757	0.62616	0.412	0.604	1
CFL2	0.104026	0.626407	0.294	0.604	1
RPL22	0.000352333	0.628181	0.741	0.958	1
RPS4X	6.79583e-06	0.628648	0.953	1	0.196298
RPL8	5.24403e-06	0.631617	0.894	0.979	0.151474
S100A6	3.24372e-05	0.63214	0.953	1	0.936947
ATP5J	0.4137	0.635559	0.576	0.854	1
NDUFA3	0.0762063	0.638278	0.329	0.708	1
RPL38	4.1507e-05	0.638313	0.859	0.979	1
RBX1	0.0775203	0.638511	0.341	0.729	1
ROMO1	0.0250027	0.638589	0.282	0.667	1
CCDC25	0.072895	0.640081	0.141	0.312	1
HCFC1R1	0.00451873	0.640826	0.176	0.5	1
BOLA3	0.176978	0.642278	0.153	0.292	1
CRIP1	0.784033	0.64391	0.176	0.229	1
SDF2L1	0.185687	0.646452	0.153	0.292	1
GAPDH	1.14417e-05	0.646719	0.906	1	0.330493
GNG11	0.345016	0.647171	0.4	0.729	1
HLA-DQB1	0.110499	0.64965	0.235	0.479	1
RPL4	0.00166035	0.649803	0.718	0.938	1
NUTF2	0.0146192	0.64987	0.165	0.417	1
CRYAB	0.0442987	0.650382	0.741	0.896	1
TMEM176B	0.262734	0.652509	0.153	0.271	1
EIF2S2	0.093474	0.652811	0.271	0.562	1
SCGB1A1	0.0462254	0.654746	0.259	0.562	1
WFDC2	0.241179	0.654772	0.059	0.125	1
LTA4H	0.371637	0.669023	0.165	0.271	1
ALOX5AP	0.202613	0.670962	0.176	0.333	1
HBA2	0.0753191	0.67644	0.094	0.229	1
CSRP2	0.0220862	0.676999	0.165	0.417	1
MIF	0.237201	0.68866	0.341	0.646	1
SCGB3A2	0.614438	0.689652	0.306	0.479	1
GMFG	0.259597	0.689827	0.165	0.292	1
MYL6	3.23765e-07	0.693798	0.953	1	0.00935196
ATP5O	0.67981	0.694308	0.518	0.854	1
USO1	0.0755977	0.701659	0.129	0.292	1
TPT1	8.04455e-12	0.702883	1	1	2.32367e-07
SUMO3	0.179459	0.734295	0.165	0.312	1
HCST	0.622404	0.734337	0.118	0.167	1
HLA-DPA1	0.899717	0.741683	0.435	0.708	1
TYMP	0.450536	0.745286	0.118	0.188	1
RPL12	1.70865e-07	0.761144	0.859	0.979	0.00493545
FTH1	9.23009e-14	0.76155	1	1	2.66611e-09
RPS13	7.70095e-09	0.762763	0.906	1	0.000222442
ACTG2	0.865309	0.767041	0.353	0.417	1
CYBA	0.911435	0.770568	0.353	0.479	1
TUBA1B	0.0890364	0.772845	0.588	0.896	1
FCER1G	0.120626	0.77388	0.259	0.521	1
MYL9	5.22551e-07	0.77687	0.988	0.896	0.0150939
TPM2	6.45383e-06	0.779184	0.882	0.958	0.186419
PCP4	0.000712504	0.787119	0.753	0.562	1
RPL31	3.14794e-06	0.794525	0.859	1	0.0909283
PCNP	0.0724598	0.802248	0.247	0.542	1
CD52	0.54342	0.810487	0.353	0.583	1
SFTPC	6.33945e-08	0.821891	0.941	1	0.00183115
HLA-DPB1	0.811529	0.822482	0.388	0.562	1
ACTA2	2.55657e-06	0.834126	0.953	0.812	0.0738465
WFDC1	0.941443	0.836725	0.259	0.333	1
MIR4458HG	0.256931	0.840903	0.247	0.438	1
NBEAL1	0.131417	0.862102	0.271	0.542	1
TAGLN	4.44924e-07	0.869394	0.965	0.771	0.0128516
NDUFB1	0.0474669	0.869413	0.624	0.896	1
S100A9	0.659187	0.871995	0.259	0.396	1
SEPW1	0.978316	0.876353	0.435	0.708	1
COX20	0.657987	0.896957	0.271	0.417	1
HLA-DQA1	0.981891	0.913207	0.2	0.25	1
HLA-DRB1	0.0185621	0.94216	0.612	0.729	1
DES	0.0922142	1.13976	0.447	0.438	1
S100A4	0.053526	1.18178	0.565	0.729	1
YBX1	1.64179e-11	1.19002	0.894	0.938	4.74231e-07

## Sheet: 2C
Table S2C. Curated gene sets positively correlated (FDR < 5%) with LAMcore in LAM cells.
Rank	Curated genet set	Genes (n)	NES	P value	FDR-adjusted P value
1	NABA_CORE_MATRISOME	44	3.36	0	0
2	REACTOME_EXTRACELLULAR_MATRIX_ORGANIZATION	58	3.32	0	0
3	NAGASHIMA_NRG1_SIGNALING_UP	51	3.19	0	0
4	REACTOME_DEGRADATION_OF_THE_EXTRACELLULAR_MATRIX	27	3.06	0	0
5	BLANCO_MELO_COVID19_SARS_COV_2_LOW_MOI_INFECTION_A594_ACE2_EXPRESSING_CELLS_UP	26	3.05	0	0
6	AMIT_EGF_RESPONSE_40_HELA	19	3.05	0	0
7	BOQUEST_STEM_CELL_UP	81	3.02	0	0
8	PID_AP1_PATHWAY	21	3	0	0
9	KINSEY_TARGETS_OF_EWSR1_FLII_FUSION_DN	88	2.96	0	0
10	KIM_WT1_TARGETS_UP	53	2.96	0	0
11	NABA_MATRISOME	100	2.95	0	0
12	BLANCO_MELO_COVID19_SARS_COV_2_INFECTION_A594_ACE2_EXPRESSING_CELLS_RUXOLITINIB_UP	49	2.94	0	0
13	ANASTASSIOU_MULTICANCER_INVASIVENESS_SIGNATURE	26	2.93	0	0
14	CHEN_HOXA5_TARGETS_9HR_UP	46	2.93	0	0
15	MEBARKI_HCC_PROGENITOR_WNT_UP	37	2.93	0	0
16	NAGASHIMA_EGF_SIGNALING_UP	23	2.92	0	0
17	PHONG_TNF_TARGETS_UP	23	2.92	0	0
18	ZWANG_CLASS_1_TRANSIENTLY_INDUCED_BY_EGF	85	2.91	0	0
19	REACTOME_ECM_PROTEOGLYCANS	21	2.9	0	0
20	BLANCO_MELO_COVID19_SARS_COV_2_INFECTION_CALU3_CELLS_UP	53	2.87	0	0
21	TURASHVILI_BREAST_LOBULAR_CARCINOMA_VS_LOBULAR_NORMAL_DN	23	2.82	0	0
22	BOQUEST_STEM_CELL_CULTURED_VS_FRESH_UP	116	2.82	0	0
23	BILD_HRAS_ONCOGENIC_SIGNATURE	52	2.8	0	0
24	OSWALD_HEMATOPOIETIC_STEM_CELL_IN_COLLAGEN_GEL_UP	56	2.79	0	0
25	BLANCO_MELO_COVID19_SARS_COV_2_INFECTION_A594_ACE2_EXPRESSING_CELLS_UP	63	2.79	0	0
26	WONG_ADULT_TISSUE_STEM_MODULE	161	2.76	0	0
27	SENESE_HDAC3_TARGETS_UP	90	2.75	0	0
28	REACTOME_COLLAGEN_DEGRADATION	18	2.74	0	0
29	WEST_ADRENOCORTICAL_TUMOR_DN	138	2.73	0	0
30	PID_ATF2_PATHWAY	16	2.72	0	0
31	BASAKI_YBX1_TARGETS_DN	90	2.71	0	0
32	ZHU_CMV_ALL_DN	42	2.7	0	0
33	RUIZ_TNC_TARGETS_UP	55	2.7	0	0
34	LEE_BMP2_TARGETS_UP	165	2.68	0	0
35	ZHOU_INFLAMMATORY_RESPONSE_LIVE_UP	56	2.66	0	0
36	PODAR_RESPONSE_TO_ADAPHOSTIN_UP	49	2.64	0	0
37	PICCALUGA_ANGIOIMMUNOBLASTIC_LYMPHOMA_DN	35	2.64	0	0
38	BURTON_ADIPOGENESIS_PEAK_AT_2HR	19	2.63	0	0
39	NABA_ECM_GLYCOPROTEINS	26	2.63	0	0
40	MILI_PSEUDOPODIA_CHEMOTAXIS_DN	110	2.61	0	0
41	CHIANG_LIVER_CANCER_SUBCLASS_CTNNB1_DN	42	2.61	0	0
42	CUI_TCF21_TARGETS_UP	15	2.6	0	0
43	ZWANG_CLASS_3_TRANSIENTLY_INDUCED_BY_EGF	41	2.6	0	0
44	REACTOME_INTEGRIN_CELL_SURFACE_INTERACTIONS	19	2.6	0	0
45	MARTORIATI_MDM4_TARGETS_FETAL_LIVER_DN	105	2.6	0	0
46	PID_INTEGRIN1_PATHWAY	17	2.6	0	0
47	WESTON_VEGFA_TARGETS_6HR	20	2.6	0	0
48	REACTOME_ASSEMBLY_OF_COLLAGEN_FIBRILS_AND_OTHER_MULTIMERIC_STRUCTURES	15	2.59	0	0
49	MCBRYAN_PUBERTAL_BREAST_5_6WK_DN	31	2.59	0	0
50	CHIARADONNA_NEOPLASTIC_TRANSFORMATION_KRAS_DN	28	2.58	0	0
51	JECHLINGER_EPITHELIAL_TO_MESENCHYMAL_TRANSITION_DN	26	2.58	0	0
52	ELVIDGE_HYPOXIA_UP	45	2.56	0	0
53	MEBARKI_HCC_PROGENITOR_WNT_UP_BLOCKED_BY_FZD8CRD	24	2.56	0	0
54	BOYLAN_MULTIPLE_MYELOMA_C_DN	18	2.55	0	0
55	DAUER_STAT3_TARGETS_UP	15	2.55	0	0
56	ONDER_CDH1_TARGETS_2_UP	65	2.54	0	0
57	STARK_PREFRONTAL_CORTEX_22Q11_DELETION_UP	42	2.53	0	0
58	PECE_MAMMARY_STEM_CELL_DN	38	2.51	0	0
59	ODONNELL_TFRC_TARGETS_UP	58	2.51	0	0
60	REACTOME_COLLAGEN_FORMATION	18	2.5	0	0
61	KHETCHOUMIAN_TRIM24_TARGETS_UP	15	2.49	0	0
62	ZWANG_EGF_INTERVAL_DN	43	2.48	0	0
63	GROSS_HYPOXIA_VIA_ELK3_DN	37	2.48	0	0
64	GERY_CEBP_TARGETS	36	2.47	0	0
65	SERVITJA_ISLET_HNF1A_TARGETS_UP	40	2.45	0	0
66	CROMER_TUMORIGENESIS_UP	15	2.45	0	0
67	CONCANNON_APOPTOSIS_BY_EPOXOMICIN_UP	54	2.45	0	0
68	KIM_GLIS2_TARGETS_UP	29	2.45	0	0
69	KOKKINAKIS_METHIONINE_DEPRIVATION_96HR_UP	33	2.44	0	0
70	GROSS_HYPOXIA_VIA_ELK3_AND_HIF1A_UP	27	2.44	0	0
71	CASORELLI_ACUTE_PROMYELOCYTIC_LEUKEMIA_UP	46	2.44	0	0
72	DASU_IL6_SIGNALING_UP	18	2.44	0	0
73	CROONQUIST_NRAS_VS_STROMAL_STIMULATION_DN	27	2.43	0	0
74	ADDYA_ERYTHROID_DIFFERENTIATION_BY_HEMIN	24	2.43	0	0
75	WILCOX_RESPONSE_TO_PROGESTERONE_DN	22	2.43	0	0
76	PID_P53_DOWNSTREAM_PATHWAY	26	2.41	0	0
77	BROCKE_APOPTOSIS_REVERSED_BY_IL6	48	2.41	0	0
78	PID_AVB3_INTEGRIN_PATHWAY	17	2.41	0	0
79	BENPORATH_ES_WITH_H3K27ME3	71	2.41	0	0
80	KAN_RESPONSE_TO_ARSENIC_TRIOXIDE	35	2.41	0	0
81	GALINDO_IMMUNE_RESPONSE_TO_ENTEROTOXIN	20	2.41	0	0
82	SARRIO_EPITHELIAL_MESENCHYMAL_TRANSITION_DN	49	2.4	0	0
83	KEGG_ECM_RECEPTOR_INTERACTION	18	2.4	0	0
84	VECCHI_GASTRIC_CANCER_ADVANCED_VS_EARLY_UP	43	2.4	0	0
85	SCHUETZ_BREAST_CANCER_DUCTAL_INVASIVE_UP	107	2.4	0	0
86	DACOSTA_UV_RESPONSE_VIA_ERCC3_DN	177	2.4	0	0
87	DAZARD_RESPONSE_TO_UV_NHEK_DN	41	2.4	0	0
88	SABATES_COLORECTAL_ADENOMA_DN	36	2.39	0.001	0
89	CHICAS_RB1_TARGETS_GROWING	43	2.39	0	0
90	VANHARANTA_UTERINE_FIBROID_DN	19	2.39	0	0
91	PLASARI_TGFB1_TARGETS_10HR_DN	50	2.38	0	0
92	BUYTAERT_PHOTODYNAMIC_THERAPY_STRESS_UP	153	2.38	0	0
93	KOKKINAKIS_METHIONINE_DEPRIVATION_48HR_UP	34	2.38	0	0
94	ELVIDGE_HYPOXIA_BY_DMOG_UP	36	2.38	0	0
95	GENTILE_UV_HIGH_DOSE_DN	58	2.38	0	0
96	WP_SPINAL_CORD_INJURY	25	2.37	0	0
97	HELLER_SILENCED_BY_METHYLATION_DN	28	2.37	0	0
98	CHEN_LVAD_SUPPORT_OF_FAILING_HEART_UP	44	2.37	0	0
99	PHONG_TNF_RESPONSE_NOT_VIA_P38	77	2.37	0	0
100	PILON_KLF1_TARGETS_UP	84	2.37	0	0
101	TURASHVILI_BREAST_LOBULAR_CARCINOMA_VS_DUCTAL_NORMAL_UP	19	2.36	0	0.001
102	WP_SENESCENCE_AND_AUTOPHAGY_IN_CANCER	20	2.36	0	0.001
103	WESTON_VEGFA_TARGETS	27	2.35	0	0.001
104	WP_CHROMOSOMAL_AND_MICROSATELLITE_INSTABILITY_IN_COLORECTAL_CANCER	16	2.35	0	0.001
105	LINDGREN_BLADDER_CANCER_CLUSTER_2B	104	2.34	0	0.001
106	GOBERT_OLIGODENDROCYTE_DIFFERENTIATION_DN	157	2.34	0	0.001
107	KEGG_FOCAL_ADHESION	50	2.34	0	0.001
108	DURAND_STROMA_S_UP	38	2.33	0	0.001
109	RODRIGUES_THYROID_CARCINOMA_POORLY_DIFFERENTIATED_DN	152	2.33	0	0.001
110	BILD_CTNNB1_ONCOGENIC_SIGNATURE	25	2.33	0	0.001
111	DUTERTRE_ESTRADIOL_RESPONSE_24HR_DN	121	2.33	0	0.001
112	BILBAN_B_CLL_LPL_DN	18	2.32	0	0.001
113	GARGALOVIC_RESPONSE_TO_OXIDIZED_PHOSPHOLIPIDS_TURQUOISE_UP	20	2.32	0	0.001
114	SHEPARD_BMYB_MORPHOLINO_DN	31	2.32	0	0.001
115	NABA_ECM_REGULATORS	20	2.32	0	0.001
116	FULCHER_INFLAMMATORY_RESPONSE_LECTIN_VS_LPS_DN	89	2.32	0	0.001
117	WANG_MLL_TARGETS	43	2.32	0	0.001
118	CROONQUIST_STROMAL_STIMULATION_UP	25	2.32	0	0.001
119	HOELZEL_NF1_TARGETS_DN	24	2.32	0	0.001
120	LEE_NEURAL_CREST_STEM_CELL_UP	35	2.32	0	0.001
121	BROWNE_HCMV_INFECTION_4HR_DN	32	2.3	0	0.001
122	REACTOME_SIGNALING_BY_PDGF	18	2.3	0	0.001
123	MITSIADES_RESPONSE_TO_APLIDIN_UP	81	2.3	0	0.001
124	RIGGI_EWING_SARCOMA_PROGENITOR_DN	28	2.3	0	0.001
125	WANG_ESOPHAGUS_CANCER_VS_NORMAL_UP	33	2.29	0.001	0.001
126	WATANABE_RECTAL_CANCER_RADIOTHERAPY_RESPONSIVE_DN	28	2.29	0	0.001
127	GERHOLD_ADIPOGENESIS_DN	24	2.29	0	0.001
128	SENESE_HDAC1_AND_HDAC2_TARGETS_DN	41	2.29	0	0.001
129	MCDOWELL_ACUTE_LUNG_INJURY_UP	16	2.29	0	0.001
130	BORCZUK_MALIGNANT_MESOTHELIOMA_DN	18	2.29	0	0.001
131	TONKS_TARGETS_OF_RUNX1_RUNX1T1_FUSION_ERYTHROCYTE_UP	41	2.28	0	0.001
132	WP_ONCOSTATIN_M_SIGNALING_PATHWAY	19	2.28	0	0.001
133	WP_ADIPOGENESIS	31	2.27	0	0.001
134	SENESE_HDAC1_TARGETS_DN	56	2.27	0	0.001
135	ZHU_CMV_24_HR_DN	28	2.27	0.001	0.001
136	WP_TGFBETA_SIGNALING_PATHWAY	26	2.27	0	0.001
137	LIM_MAMMARY_LUMINAL_MATURE_DN	36	2.26	0	0.001
138	MEBARKI_HCC_PROGENITOR_WNT_UP_CTNNB1_DEPENDENT	20	2.26	0	0.001
139	MIYAGAWA_TARGETS_OF_EWSR1_ETS_FUSIONS_DN	44	2.26	0	0.001
140	IKEDA_MIR30_TARGETS_UP	29	2.26	0.001	0.001
141	SCHAEFFER_PROSTATE_DEVELOPMENT_48HR_DN	64	2.25	0	0.001
142	YAO_TEMPORAL_RESPONSE_TO_PROGESTERONE_CLUSTER_16	24	2.25	0	0.001
143	WANG_SMARCE1_TARGETS_UP	68	2.24	0	0.001
144	PICCALUGA_ANGIOIMMUNOBLASTIC_LYMPHOMA_UP	65	2.24	0	0.001
145	BURTON_ADIPOGENESIS_9	24	2.24	0	0.001
146	FALVELLA_SMOKERS_WITH_LUNG_CANCER	24	2.24	0	0.001
147	ZHU_CMV_8_HR_DN	16	2.24	0	0.001
148	BLANCO_MELO_BRONCHIAL_EPITHELIAL_CELLS_INFLUENZA_A_DEL_NS1_INFECTION_UP	87	2.24	0	0.001
149	REACTOME_NON_INTEGRIN_MEMBRANE_ECM_INTERACTIONS	15	2.23	0	0.001
150	GAUSSMANN_MLL_AF4_FUSION_TARGETS_F_UP	37	2.23	0	0.002
151	WONG_ENDMETRIUM_CANCER_DN	22	2.22	0.001	0.002
152	PASINI_SUZ12_TARGETS_DN	100	2.22	0	0.002
153	JECHLINGER_EPITHELIAL_TO_MESENCHYMAL_TRANSITION_UP	19	2.22	0	0.002
154	MEBARKI_HCC_PROGENITOR_FZD8CRD_DN	36	2.21	0	0.002
155	INGRAM_SHH_TARGETS_UP	29	2.21	0	0.002
156	DANG_REGULATED_BY_MYC_DN	76	2.21	0	0.002
157	BERENJENO_ROCK_SIGNALING_NOT_VIA_RHOA_DN	26	2.21	0	0.002
158	SENGUPTA_NASOPHARYNGEAL_CARCINOMA_WITH_LMP1_UP	67	2.21	0	0.002
159	ZHOU_INFLAMMATORY_RESPONSE_FIMA_UP	51	2.21	0	0.002
160	LIAO_METASTASIS	83	2.21	0	0.002
161	NAKAMURA_ADIPOGENESIS_EARLY_UP	16	2.2	0	0.002
162	TAKEDA_TARGETS_OF_NUP98_HOXA9_FUSION_3D_UP	35	2.2	0	0.002
163	MISSIAGLIA_REGULATED_BY_METHYLATION_UP	31	2.2	0	0.002
164	YAO_TEMPORAL_RESPONSE_TO_PROGESTERONE_CLUSTER_1	20	2.19	0	0.002
165	LINDGREN_BLADDER_CANCER_HIGH_RECURRENCE	16	2.19	0	0.002
166	KAYO_CALORIE_RESTRICTION_MUSCLE_UP	31	2.19	0	0.002
167	DACOSTA_UV_RESPONSE_VIA_ERCC3_COMMON_DN	104	2.19	0	0.002
168	KIM_WT1_TARGETS_8HR_UP	46	2.19	0.001	0.002
169	DAVICIONI_TARGETS_OF_PAX_FOXO1_FUSIONS_UP	67	2.19	0	0.002
170	GOZGIT_ESR1_TARGETS_DN	112	2.18	0	0.002
171	ALTEMEIER_RESPONSE_TO_LPS_WITH_MECHANICAL_VENTILATION	25	2.18	0	0.002
172	REACTOME_NUCLEAR_EVENTS_KINASE_AND_TRANSCRIPTION_FACTOR_ACTIVATION_	15	2.18	0	0.002
173	SASAI_RESISTANCE_TO_NEOPLASTIC_TRANSFROMATION	19	2.18	0	0.002
174	KIM_WT1_TARGETS_12HR_UP	39	2.18	0	0.002
175	TURASHVILI_BREAST_DUCTAL_CARCINOMA_VS_DUCTAL_NORMAL_DN	35	2.17	0.001	0.003
176	VERRECCHIA_EARLY_RESPONSE_TO_TGFB1	23	2.17	0	0.003
177	PID_BETA_CATENIN_NUC_PATHWAY	19	2.17	0	0.003
178	TAKEDA_TARGETS_OF_NUP98_HOXA9_FUSION_8D_UP	20	2.17	0.001	0.003
179	WP_BREAST_CANCER_PATHWAY	25	2.17	0	0.003
180	CHANDRAN_METASTASIS_UP	47	2.17	0	0.003
181	PID_SMAD2_3NUCLEAR_PATHWAY	16	2.16	0	0.003
182	LINDVALL_IMMORTALIZED_BY_TERT_UP	18	2.16	0	0.003
183	SHEPARD_CRUSH_AND_BURN_MUTANT_DN	23	2.16	0	0.003
184	MANALO_HYPOXIA_UP	40	2.16	0	0.003
185	GARY_CD5_TARGETS_UP	110	2.16	0	0.003
186	SMIRNOV_CIRCULATING_ENDOTHELIOCYTES_IN_CANCER_UP	33	2.16	0	0.003
187	LANDIS_BREAST_CANCER_PROGRESSION_DN	19	2.15	0.002	0.003
188	SUNG_METASTASIS_STROMA_UP	32	2.15	0	0.003
189	CHICAS_RB1_TARGETS_SENESCENT	95	2.15	0	0.003
190	IGLESIAS_E2F_TARGETS_UP	57	2.15	0	0.003
191	DIRMEIER_LMP1_RESPONSE_EARLY	24	2.14	0.001	0.003
192	HELLER_HDAC_TARGETS_SILENCED_BY_METHYLATION_UP	86	2.14	0	0.003
193	MCBRYAN_PUBERTAL_BREAST_6_7WK_UP	42	2.14	0.003	0.003
194	KONDO_EZH2_TARGETS	33	2.13	0.001	0.003
195	SHEPARD_CRUSH_AND_BURN_MUTANT_UP	39	2.13	0	0.003
196	LI_WILMS_TUMOR_VS_FETAL_KIDNEY_1_UP	43	2.13	0.003	0.004
197	WP_FOCAL_ADHESION	48	2.13	0	0.004
198	RIGGI_EWING_SARCOMA_PROGENITOR_UP	55	2.13	0	0.004
199	BRUECKNER_TARGETS_OF_MIRLET7A3_UP	21	2.12	0.002	0.004
200	HESS_TARGETS_OF_HOXA9_AND_MEIS1_DN	17	2.12	0	0.004
201	OSMAN_BLADDER_CANCER_UP	103	2.12	0	0.004
202	HUMMERICH_SKIN_CANCER_PROGRESSION_UP	24	2.12	0	0.004
203	ZHANG_RESPONSE_TO_IKK_INHIBITOR_AND_TNF_UP	35	2.11	0.001	0.004
204	CHANDRAN_METASTASIS_DN	65	2.11	0	0.004
205	IZADPANAH_STEM_CELL_ADIPOSE_VS_BONE_DN	27	2.11	0.001	0.004
206	AMIT_SERUM_RESPONSE_120_MCF10A	18	2.11	0.002	0.004
207	SWEET_KRAS_TARGETS_UP	28	2.11	0.001	0.004
208	HADDAD_B_LYMPHOCYTE_PROGENITOR	48	2.11	0.001	0.004
209	REACTOME_REGULATION_OF_INSULIN_LIKE_GROWTH_FACTOR_IGF_TRANSPORT_AND_UPTAKE_BY_INSULIN_LIKE_GROWTH_FACTOR_BINDING_PROTEINS_IGFBPS_	24	2.11	0	0.004
210	RASHI_RESPONSE_TO_IONIZING_RADIATION_2	30	2.11	0	0.004
211	TAKEDA_TARGETS_OF_NUP98_HOXA9_FUSION_16D_DN	20	2.11	0.002	0.004
212	TONKS_TARGETS_OF_RUNX1_RUNX1T1_FUSION_HSC_UP	60	2.1	0.003	0.004
213	VART_KSHV_INFECTION_ANGIOGENIC_MARKERS_UP	17	2.1	0.002	0.004
214	GABRIELY_MIR21_TARGETS	61	2.1	0	0.004
215	KOINUMA_TARGETS_OF_SMAD2_OR_SMAD3	156	2.1	0	0.005
216	PLASARI_TGFB1_SIGNALING_VIA_NFIC_1HR_DN	27	2.09	0.003	0.005
217	SMID_BREAST_CANCER_LUMINAL_A_UP	21	2.09	0	0.005
218	PRAMOONJAGO_SOX4_TARGETS_UP	16	2.09	0	0.005
219	MEISSNER_BRAIN_HCP_WITH_H3K4ME3_AND_H3K27ME3	99	2.08	0	0.005
220	BROWNE_HCMV_INFECTION_48HR_DN	83	2.08	0	0.005
221	BOYAULT_LIVER_CANCER_SUBCLASS_G1_UP	22	2.07	0	0.006
222	REACTOME_SIGNALING_BY_RECEPTOR_TYROSINE_KINASES	103	2.07	0	0.006
223	MCBRYAN_PUBERTAL_BREAST_4_5WK_UP	50	2.07	0	0.006
224	VART_KSHV_INFECTION_ANGIOGENIC_MARKERS_DN	20	2.07	0.003	0.006
225	HOSHIDA_LIVER_CANCER_LATE_RECURRENCE_UP	22	2.06	0.002	0.006
226	BLANCO_MELO_MERS_COV_INFECTION_MCR5_CELLS_UP	20	2.06	0.003	0.006
227	GOTZMANN_EPITHELIAL_TO_MESENCHYMAL_TRANSITION_UP	24	2.06	0	0.006
228	KATSANOU_ELAVL1_TARGETS_UP	29	2.06	0.001	0.006
229	PEREZ_TP53_TARGETS	102	2.06	0	0.006
230	LEE_NEURAL_CREST_STEM_CELL_DN	25	2.06	0	0.006
231	WP_EPITHELIAL_TO_MESENCHYMAL_TRANSITION_IN_COLORECTAL_CANCER	23	2.06	0.001	0.006
232	MILI_PSEUDOPODIA_HAPTOTAXIS_DN	105	2.06	0	0.006
233	FISCHER_DIRECT_P53_TARGETS_META_ANALYSIS	39	2.05	0.001	0.007
234	WINZEN_DEGRADED_VIA_KHSRP	15	2.05	0.002	0.007
235	IWANAGA_CARCINOGENESIS_BY_KRAS_PTEN_DN	54	2.05	0	0.007
236	SEKI_INFLAMMATORY_RESPONSE_LPS_UP	15	2.04	0	0.007
237	SENGUPTA_NASOPHARYNGEAL_CARCINOMA_UP	52	2.04	0	0.007
238	OISHI_CHOLANGIOMA_STEM_CELL_LIKE_DN	62	2.04	0.001	0.007
239	SESTO_RESPONSE_TO_UV_C8	18	2.04	0.001	0.007
240	WOO_LIVER_CANCER_RECURRENCE_UP	23	2.04	0.003	0.007
241	REACTOME_INTERLEUKIN_4_AND_INTERLEUKIN_13_SIGNALING	26	2.03	0.006	0.007
242	REACTOME_DISEASES_OF_GLYCOSYLATION	23	2.03	0.001	0.008
243	BERENJENO_TRANSFORMED_BY_RHOA_DN	119	2.03	0	0.008
244	CARD_MIR302A_TARGETS	16	2.03	0.003	0.008
245	BENPORATH_EED_TARGETS	77	2.03	0	0.008
246	WP_IL18_SIGNALING_PATHWAY	54	2.03	0	0.008
247	JINESH_BLEBBISHIELD_TO_IMMUNE_CELL_FUSION_PBSHMS_UP	85	2.02	0	0.008
248	HENDRICKS_SMARCA4_TARGETS_UP	15	2.02	0.002	0.008
249	WANG_LMO4_TARGETS_UP	61	2.02	0.001	0.008
250	HIRSCH_CELLULAR_TRANSFORMATION_SIGNATURE_DN	33	2.02	0.001	0.008
251	RODWELL_AGING_KIDNEY_NO_BLOOD_UP	66	2.02	0.004	0.008
252	GAUSSMANN_MLL_AF4_FUSION_TARGETS_G_UP	31	2.01	0.003	0.008
253	ZHOU_TNF_SIGNALING_30MIN	15	2	0.002	0.01
254	AMIT_SERUM_RESPONSE_60_MCF10A	17	2	0	0.01
255	IVANOVA_HEMATOPOIESIS_STEM_CELL	34	2	0.001	0.01
256	BROWNE_HCMV_INFECTION_8HR_UP	15	1.98	0.002	0.011
257	QI_PLASMACYTOMA_DN	25	1.98	0.006	0.011
258	SCHAEFFER_PROSTATE_DEVELOPMENT_12HR_UP	21	1.98	0.004	0.011
259	RODRIGUES_THYROID_CARCINOMA_ANAPLASTIC_DN	106	1.98	0.001	0.011
260	SWEET_LUNG_CANCER_KRAS_DN	95	1.98	0	0.011
261	REACTOME_RESPONSE_TO_ELEVATED_PLATELET_CYTOSOLIC_CA2_	25	1.98	0.007	0.011
262	CUI_TCF21_TARGETS_2_UP	76	1.98	0.003	0.011
263	LIAN_LIPA_TARGETS_6M	19	1.98	0.003	0.011
264	CREIGHTON_ENDOCRINE_THERAPY_RESISTANCE_5	90	1.98	0.001	0.011
265	LI_WILMS_TUMOR_VS_FETAL_KIDNEY_2_DN	15	1.98	0.006	0.011
266	KARLSSON_TGFB1_TARGETS_DN	57	1.97	0.001	0.012
267	UDAYAKUMAR_MED1_TARGETS_DN	54	1.95	0.003	0.013
268	SENESE_HDAC2_TARGETS_DN	22	1.95	0	0.014
269	HOSHIDA_LIVER_CANCER_SURVIVAL_UP	18	1.95	0.005	0.013
270	DELYS_THYROID_CANCER_DN	49	1.95	0	0.014
271	WP_GASTRIN_SIGNALING_PATHWAY	22	1.94	0.004	0.014
272	HAMAI_APOPTOSIS_VIA_TRAIL_DN	30	1.94	0.003	0.015
273	LI_INDUCED_T_TO_NATURAL_KILLER_DN	24	1.94	0.003	0.015
274	BHAT_ESR1_TARGETS_VIA_AKT1_UP	32	1.94	0.003	0.015
275	WHITFIELD_CELL_CYCLE_S	17	1.93	0.006	0.015
276	WINTER_HYPOXIA_METAGENE	55	1.93	0.004	0.015
277	BHAT_ESR1_TARGETS_NOT_VIA_AKT1_UP	16	1.93	0.006	0.016
278	BLANCO_MELO_BETA_INTERFERON_TREATED_BRONCHIAL_EPITHELIAL_CELLS_UP	45	1.93	0.004	0.016
279	PID_ERBB1_DOWNSTREAM_PATHWAY	27	1.92	0	0.016
280	HOSHIDA_LIVER_CANCER_SUBCLASS_S1	74	1.92	0.001	0.016
281	PETROVA_ENDOTHELIUM_LYMPHATIC_VS_BLOOD_DN	42	1.92	0.004	0.017
282	DELYS_THYROID_CANCER_UP	92	1.92	0.003	0.017
283	DELPUECH_FOXO3_TARGETS_UP	17	1.92	0.005	0.017
284	RAO_BOUND_BY_SALL4_ISOFORM_B	76	1.91	0.005	0.017
285	ONDER_CDH1_TARGETS_1_UP	29	1.91	0.006	0.017
286	PHONG_TNF_RESPONSE_VIA_P38_PARTIAL	40	1.91	0.007	0.018
287	CHEN_METABOLIC_SYNDROM_NETWORK	184	1.91	0	0.018
288	KRIGE_RESPONSE_TO_TOSEDOSTAT_24HR_UP	130	1.91	0	0.018
289	TORCHIA_TARGETS_OF_EWSR1_FLI1_FUSION_UP	33	1.9	0.006	0.018
290	GOZGIT_ESR1_TARGETS_UP	17	1.9	0.01	0.019
291	WP_PROLACTIN_SIGNALING_PATHWAY	20	1.9	0.011	0.019
292	CHICAS_RB1_TARGETS_CONFLUENT	124	1.9	0.001	0.019
293	NUYTTEN_EZH2_TARGETS_UP	175	1.9	0.001	0.019
294	CHARAFE_BREAST_CANCER_LUMINAL_VS_MESENCHYMAL_DN	89	1.89	0.001	0.02
295	BLUM_RESPONSE_TO_SALIRASIB_DN	60	1.89	0.001	0.02
296	CHIARADONNA_NEOPLASTIC_TRANSFORMATION_CDC25_UP	26	1.89	0.007	0.02
297	MULLIGHAN_MLL_SIGNATURE_1_DN	38	1.89	0.007	0.02
298	WP_WNT_SIGNALING	22	1.89	0.004	0.02
299	YAO_HOXA10_TARGETS_VIA_PROGESTERONE_UP	15	1.88	0	0.02
300	LINDVALL_IMMORTALIZED_BY_TERT_DN	18	1.88	0.011	0.02
301	WP_NUCLEAR_RECEPTORS_METAPATHWAY	56	1.88	0.004	0.021
302	RODRIGUES_DCC_TARGETS_DN	35	1.88	0.01	0.021
303	KEGG_MAPK_SIGNALING_PATHWAY	35	1.87	0.006	0.022
304	REACTOME_SIGNALING_BY_NTRKS	31	1.87	0.007	0.023
305	WNT_SIGNALING	19	1.87	0.008	0.023
306	FEVR_CTNNB1_TARGETS_UP	119	1.87	0	0.023
307	HELLEBREKERS_SILENCED_DURING_TUMOR_ANGIOGENESIS	25	1.86	0.01	0.023
308	PEREZ_TP63_TARGETS	41	1.86	0.011	0.023
309	LANDIS_ERBB2_BREAST_TUMORS_324_UP	31	1.86	0.004	0.023
310	BENPORATH_SUZ12_TARGETS	64	1.86	0.007	0.023
311	WP_CIRCADIAN_RHYTHM_RELATED_GENES	30	1.86	0.007	0.023
312	ALCALAY_AML_BY_NPM1_LOCALIZATION_UP	25	1.86	0.011	0.023
313	TONKS_TARGETS_OF_RUNX1_RUNX1T1_FUSION_SUSTAINDED_IN_ERYTHROCYTE_UP	19	1.86	0.007	0.024
314	KRIGE_RESPONSE_TO_TOSEDOSTAT_6HR_UP	162	1.86	0	0.023
315	KEGG_WNT_SIGNALING_PATHWAY	26	1.86	0.006	0.024
316	WP_NCRNAS_INVOLVED_IN_WNT_SIGNALING_IN_HEPATOCELLULAR_CARCINOMA	18	1.85	0.006	0.024
317	FOSTER_TOLERANT_MACROPHAGE_DN	78	1.85	0.004	0.024
318	RIGGINS_TAMOXIFEN_RESISTANCE_DN	38	1.85	0.001	0.025
319	MORI_MATURE_B_LYMPHOCYTE_UP	18	1.85	0.012	0.025
320	GAVIN_FOXP3_TARGETS_CLUSTER_P7	22	1.85	0.01	0.025
321	HAMAI_APOPTOSIS_VIA_TRAIL_UP	143	1.84	0.001	0.026
322	WP_MAPK_SIGNALING_PATHWAY	31	1.84	0.007	0.027
323	LOPEZ_TRANSLATION_VIA_FN1_SIGNALING	15	1.84	0.008	0.027
324	DAZARD_UV_RESPONSE_CLUSTER_G6	20	1.84	0.015	0.027
325	JACKSON_DNMT1_TARGETS_UP	25	1.84	0.007	0.027
326	HAN_SATB1_TARGETS_DN	68	1.84	0.007	0.027
327	COATES_MACROPHAGE_M1_VS_M2_DN	15	1.84	0.015	0.027
328	VERHAAK_AML_WITH_NPM1_MUTATED_UP	43	1.83	0.004	0.027
329	BROWNE_HCMV_INFECTION_16HR_DN	20	1.83	0.017	0.027
330	KAAB_HEART_ATRIUM_VS_VENTRICLE_UP	61	1.83	0.005	0.028
331	WAMUNYOKOLI_OVARIAN_CANCER_LMP_DN	46	1.83	0.008	0.028
332	LIM_MAMMARY_STEM_CELL_UP	89	1.83	0.006	0.028
333	YAMAZAKI_TCEB3_TARGETS_UP	43	1.83	0.003	0.028
334	LEE_AGING_NEOCORTEX_UP	21	1.82	0.01	0.029
335	WP_FOCAL_ADHESIONPI3KAKTMTORSIGNALING_PATHWAY	44	1.82	0.008	0.03
336	WHITFIELD_CELL_CYCLE_G2	23	1.82	0.013	0.03
337	CAIRO_HEPATOBLASTOMA_CLASSES_DN	45	1.82	0.008	0.03
338	FLORIO_NEOCORTEX_BASAL_RADIAL_GLIA_DN	17	1.82	0.005	0.03
339	ZHU_CMV_ALL_UP	19	1.82	0.011	0.03
340	JOHNSTONE_PARVB_TARGETS_3_UP	111	1.82	0	0.031
341	LINDGREN_BLADDER_CANCER_CLUSTER_1_DN	52	1.81	0.015	0.031
342	HOLLERN_EMT_BREAST_TUMOR_UP	23	1.81	0.003	0.032
343	WANG_HCP_PROSTATE_CANCER	22	1.81	0.012	0.032
344	GROSS_HYPOXIA_VIA_HIF1A_DN	25	1.81	0.018	0.032
345	NABA_MATRISOME_ASSOCIATED	56	1.81	0.007	0.032
346	IWANAGA_CARCINOGENESIS_BY_KRAS_DN	21	1.8	0.011	0.033
347	BENPORATH_OCT4_TARGETS	40	1.8	0.019	0.033
348	RICKMAN_TUMOR_DIFFERENTIATED_WELL_VS_POORLY_DN	55	1.8	0.008	0.033
349	ONKEN_UVEAL_MELANOMA_UP	196	1.8	0.002	0.034
350	SMID_BREAST_CANCER_BASAL_DN	92	1.8	0.007	0.034
351	WP_EGFEGFR_SIGNALING_PATHWAY	29	1.8	0.018	0.034
352	HELLER_SILENCED_BY_METHYLATION_UP	44	1.8	0.008	0.034
353	HOLLERN_SQUAMOUS_BREAST_TUMOR	15	1.8	0.025	0.034
354	TAKEDA_TARGETS_OF_NUP98_HOXA9_FUSION_16D_UP	15	1.8	0.014	0.034
355	IZADPANAH_STEM_CELL_ADIPOSE_VS_BONE_UP	27	1.79	0.018	0.035
356	WP_LNCRNA_INVOLVEMENT_IN_CANONICAL_WNT_SIGNALING_AND_COLORECTAL_CANCER	19	1.79	0.012	0.035
357	ENK_UV_RESPONSE_EPIDERMIS_DN	102	1.79	0.005	0.035
358	RICKMAN_TUMOR_DIFFERENTIATED_MODERATELY_VS_POORLY_UP	19	1.79	0.018	0.035
359	AKL_HTLV1_INFECTION_DN	16	1.79	0.016	0.035
360	MARTINEZ_RB1_AND_TP53_TARGETS_DN	105	1.79	0.005	0.035
361	MASSARWEH_TAMOXIFEN_RESISTANCE_UP	75	1.79	0.013	0.035
362	VERHAAK_GLIOBLASTOMA_PRONEURAL	18	1.79	0.019	0.036
363	WP_ENDOMETRIAL_CANCER	16	1.78	0.015	0.036
364	SMIRNOV_RESPONSE_TO_IR_6HR_UP	28	1.78	0.013	0.036
365	PYEON_CANCER_HEAD_AND_NECK_VS_CERVICAL_UP	16	1.78	0.006	0.037
366	KRIEG_HYPOXIA_NOT_VIA_KDM3A	110	1.78	0.002	0.036
367	RIZKI_TUMOR_INVASIVENESS_3D_UP	28	1.78	0.013	0.037
368	MIKKELSEN_NPC_ICP_WITH_H3K4ME3	49	1.78	0.01	0.038
369	REACTOME_PLATELET_ACTIVATION_SIGNALING_AND_AGGREGATION	41	1.77	0.008	0.038
370	REACTOME_CELL_JUNCTION_ORGANIZATION	15	1.77	0.018	0.038
371	GRUETZMANN_PANCREATIC_CANCER_UP	93	1.77	0.006	0.038
372	BLALOCK_ALZHEIMERS_DISEASE_UP	320	1.77	0	0.039
373	NAKAMURA_TUMOR_ZONE_PERIPHERAL_VS_CENTRAL_UP	63	1.77	0.01	0.039
374	GAUSSMANN_MLL_AF4_FUSION_TARGETS_A_UP	30	1.77	0.009	0.039
375	NUYTTEN_NIPP1_TARGETS_UP	114	1.76	0.004	0.04
376	NELSON_RESPONSE_TO_ANDROGEN_UP	17	1.76	0.017	0.041
377	BENPORATH_CYCLING_GENES	99	1.76	0.002	0.04
378	MARTINEZ_RB1_TARGETS_UP	126	1.76	0.002	0.041
379	PID_FAK_PATHWAY	16	1.76	0.012	0.041
380	BORLAK_LIVER_CANCER_EGF_UP	17	1.76	0.015	0.041
381	ZHONG_RESPONSE_TO_AZACITIDINE_AND_TSA_UP	31	1.76	0.02	0.041
382	MATSUDA_NATURAL_KILLER_DIFFERENTIATION	74	1.76	0.004	0.041
383	PID_CMYB_PATHWAY	16	1.76	0.015	0.041
384	AMUNDSON_RESPONSE_TO_ARSENITE	52	1.75	0.015	0.042
385	MCCLUNG_CREB1_TARGETS_UP	21	1.75	0.017	0.043
386	RADMACHER_AML_PROGNOSIS	15	1.75	0.018	0.043
387	ZHOU_INFLAMMATORY_RESPONSE_FIMA_DN	17	1.75	0.016	0.043
388	JINESH_BLEBBISHIELD_TRANSFORMED_STEM_CELL_SPHERES_DN	49	1.75	0.02	0.043
389	WP_BRAINDERIVED_NEUROTROPHIC_FACTOR_BDNF_SIGNALING_PATHWAY	22	1.74	0.029	0.044
390	GRAHAM_NORMAL_QUIESCENT_VS_NORMAL_DIVIDING_UP	16	1.74	0.019	0.044
391	BURTON_ADIPOGENESIS_PEAK_AT_0HR	25	1.74	0.026	0.044
392	PHONG_TNF_RESPONSE_VIA_P38_COMPLETE	59	1.74	0.019	0.044
393	SCHAEFFER_PROSTATE_DEVELOPMENT_6HR_DN	105	1.74	0.006	0.044
394	BHATI_G2M_ARREST_BY_2METHOXYESTRADIOL_UP	16	1.74	0.022	0.045
395	ONDER_CDH1_SIGNALING_VIA_CTNNB1	22	1.74	0.024	0.045
396	COATES_MACROPHAGE_M1_VS_M2_UP	19	1.74	0.022	0.045
397	JAEGER_METASTASIS_DN	18	1.74	0.027	0.045
398	MULLIGHAN_MLL_SIGNATURE_2_DN	44	1.74	0.013	0.045
399	HOEBEKE_LYMPHOID_STEM_CELL_UP	22	1.74	0.023	0.045
400	CHEBOTAEV_GR_TARGETS_DN	21	1.74	0.028	0.045
401	KEGG_CARDIAC_MUSCLE_CONTRACTION	18	1.74	0.023	0.046
402	LIAN_LIPA_TARGETS_3M	18	1.73	0.024	0.046
403	DELACROIX_RAR_BOUND_ES	73	1.73	0.014	0.047
404	WIERENGA_STAT5A_TARGETS_UP	36	1.73	0.011	0.047
405	REACTOME_ESTROGEN_DEPENDENT_GENE_EXPRESSION	25	1.73	0.022	0.047
406	ZHU_CMV_24_HR_UP	18	1.73	0.023	0.048
407	DELACROIX_RARG_BOUND_MEF	67	1.73	0.018	0.048
408	GRESHOCK_CANCER_COPY_NUMBER_UP	62	1.72	0.006	0.048
409	EBAUER_TARGETS_OF_PAX3_FOXO1_FUSION_UP	37	1.72	0.024	0.048
410	GINESTIER_BREAST_CANCER_ZNF217_AMPLIFIED_UP	15	1.72	0.03	0.049
411	CUI_TCF21_TARGETS_2_DN	146	1.72	0.002	0.049

## Sheet: 2D
Table S2D. Curated gene sets negatively correlated (FDR < 5%) with LAMcore in LAM cells.
Rank	Curated gene set	Genes (n)	NES	P value	FDR-adjusted P value
1	REACTOME_EUKARYOTIC_TRANSLATION_ELONGATION	83	-5.59	0	0
2	REACTOME_EUKARYOTIC_TRANSLATION_INITIATION	93	-5.53	0	0
3	REACTOME_SELENOAMINO_ACID_METABOLISM	81	-5.36	0	0
4	WP_CYTOPLASMIC_RIBOSOMAL_PROTEINS	77	-5.36	0	0
5	KEGG_RIBOSOME	79	-5.34	0	0
6	REACTOME_SRP_DEPENDENT_COTRANSLATIONAL_PROTEIN_TARGETING_TO_MEMBRANE	84	-5.34	0	0
7	REACTOME_NONSENSE_MEDIATED_DECAY_NMD_	87	-5.29	0	0
8	REACTOME_RESPONSE_OF_EIF2AK4_GCN2_TO_AMINO_ACID_DEFICIENCY	85	-5.25	0	0
9	REACTOME_TRANSLATION	120	-5.19	0	0
10	REACTOME_RRNA_PROCESSING	95	-5.04	0	0
11	REACTOME_INFLUENZA_INFECTION	94	-5.02	0	0
12	REACTOME_REGULATION_OF_EXPRESSION_OF_SLITS_AND_ROBOS	101	-4.98	0	0
13	REACTOME_SIGNALING_BY_ROBO_RECEPTORS	108	-4.75	0	0
14	REACTOME_METABOLISM_OF_AMINO_ACIDS_AND_DERIVATIVES	112	-4.71	0	0
15	BILANGES_SERUM_AND_RAPAMYCIN_SENSITIVE_GENES	52	-4.53	0	0
16	REACTOME_ACTIVATION_OF_THE_MRNA_UPON_BINDING_OF_THE_CAP_BINDING_COMPLEX_AND_EIFS_AND_SUBSEQUENT_BINDING_TO_43S	44	-4.03	0	0
17	CHNG_MULTIPLE_MYELOMA_HYPERPLOID_UP	36	-3.83	0	0
18	REACTOME_CELLULAR_RESPONSES_TO_EXTERNAL_STIMULI	174	-3.71	0	0
19	REACTOME_INFECTIOUS_DISEASE	188	-3.64	0	0
20	HSIAO_HOUSEKEEPING_GENES	193	-3.62	0	0
21	REACTOME_METABOLISM_OF_RNA	187	-3.53	0	0
22	CAIRO_HEPATOBLASTOMA_CLASSES_UP	104	-3.3	0	0
23	REACTOME_NERVOUS_SYSTEM_DEVELOPMENT	168	-3.3	0	0
24	PECE_MAMMARY_STEM_CELL_UP	72	-3.22	0	0
25	TIEN_INTESTINE_PROBIOTICS_6HR_UP	33	-3.19	0	0
26	MALONEY_RESPONSE_TO_17AAG_DN	28	-3.18	0	0
27	YAO_TEMPORAL_RESPONSE_TO_PROGESTERONE_CLUSTER_13	55	-3.13	0	0
28	BOQUEST_STEM_CELL_DN	21	-3.08	0	0
29	DAZARD_UV_RESPONSE_CLUSTER_G1	28	-3.07	0	0
30	MARTENS_TRETINOIN_RESPONSE_DN	185	-2.91	0	0
31	KIM_BIPOLAR_DISORDER_OLIGODENDROCYTE_DENSITY_CORR_UP	170	-2.87	0	0
32	STARK_PREFRONTAL_CORTEX_22Q11_DELETION_DN	122	-2.75	0	0
33	WP_ALLOGRAFT_REJECTION	17	-2.74	0	0
34	REACTOME_DEVELOPMENTAL_BIOLOGY	210	-2.7	0	0
35	LEE_LIVER_CANCER_SURVIVAL_DN	58	-2.69	0	0
36	POMEROY_MEDULLOBLASTOMA_PROGNOSIS_DN	16	-2.68	0	0
37	YAMASHITA_LIVER_CANCER_WITH_EPCAM_UP	26	-2.67	0	0
38	JISON_SICKLE_CELL_DISEASE_DN	63	-2.67	0	0
39	BILANGES_RAPAMYCIN_SENSITIVE_VIA_TSC1_AND_TSC2	25	-2.62	0	0
40	KIM_ALL_DISORDERS_OLIGODENDROCYTE_NUMBER_CORR_UP	183	-2.61	0	0
41	BOUDOUKHA_BOUND_BY_IGF2BP2	40	-2.6	0	0
42	TAKAO_RESPONSE_TO_UVB_RADIATION_UP	34	-2.57	0	0
43	BILANGES_SERUM_RESPONSE_TRANSLATION	21	-2.57	0	0
44	ICHIBA_GRAFT_VERSUS_HOST_DISEASE_35D_UP	34	-2.56	0	0
45	WANG_TUMOR_INVASIVENESS_UP	122	-2.55	0	0
46	PUJANA_BRCA1_PCC_NETWORK	257	-2.52	0	0
47	MODY_HIPPOCAMPUS_PRENATAL	22	-2.49	0	0
48	MOOTHA_MITOCHONDRIA	89	-2.49	0	0
49	WALLACE_PROSTATE_CANCER_RACE_UP	58	-2.49	0	0
50	TONG_INTERACT_WITH_PTTG1	18	-2.47	0	0
51	NUTT_GBM_VS_AO_GLIOMA_DN	16	-2.45	0	0.001
52	FLOTHO_PEDIATRIC_ALL_THERAPY_RESPONSE_UP	27	-2.45	0	0.001
53	MOOTHA_VOXPHOS	25	-2.42	0	0.001
54	HUANG_GATA2_TARGETS_UP	29	-2.39	0	0.001
55	ANDERSEN_LIVER_CANCER_KRT19_UP	20	-2.38	0	0.001
56	OSMAN_BLADDER_CANCER_DN	103	-2.38	0	0.001
57	DANG_MYC_TARGETS_UP	47	-2.38	0	0.001
58	DARWICHE_SKIN_TUMOR_PROMOTER_UP	31	-2.37	0	0.001
59	BENPORATH_MYC_MAX_TARGETS	164	-2.36	0	0.001
60	REACTOME_MHC_CLASS_II_ANTIGEN_PRESENTATION	27	-2.34	0	0.001
61	REACTOME_DISEASE	285	-2.33	0	0.002
62	WONG_MITOCHONDRIA_GENE_MODULE	55	-2.33	0	0.002
63	WP_TRANSLATION_FACTORS	20	-2.3	0	0.002
64	DAIRKEE_CANCER_PRONE_RESPONSE_BPA_E2	23	-2.29	0	0.002
65	GAVIN_FOXP3_TARGETS_CLUSTER_T7	27	-2.27	0	0.002
66	KEGG_SYSTEMIC_LUPUS_ERYTHEMATOSUS	15	-2.27	0	0.002
67	NATSUME_RESPONSE_TO_INTERFERON_BETA_DN	24	-2.25	0	0.003
68	WIELAND_UP_BY_HBV_INFECTION	31	-2.23	0	0.003
69	MOOTHA_HUMAN_MITODB_6_2002	87	-2.23	0	0.003
70	DIAZ_CHRONIC_MEYLOGENOUS_LEUKEMIA_DN	31	-2.22	0	0.004
71	ZHANG_RESPONSE_TO_CANTHARIDIN_DN	18	-2.21	0	0.004
72	LINDGREN_BLADDER_CANCER_CLUSTER_1_UP	26	-2.21	0.003	0.004
73	DARWICHE_SQUAMOUS_CELL_CARCINOMA_UP	29	-2.18	0	0.004
74	REACTOME_COSTIMULATION_BY_THE_CD28_FAMILY	17	-2.17	0.003	0.005
75	WONG_EMBRYONIC_STEM_CELL_CORE	69	-2.16	0	0.005
76	KEGG_VIRAL_MYOCARDITIS	18	-2.15	0	0.005
77	REACTOME_AUTOPHAGY	32	-2.15	0	0.005
78	DARWICHE_PAPILLOMA_RISK_HIGH_UP	31	-2.14	0.003	0.005
79	REACTOME_TCR_SIGNALING	30	-2.13	0	0.006
80	BLANCO_MELO_COVID19_SARS_COV_2_POS_PATIENT_LUNG_TISSUE_UP	16	-2.12	0.003	0.006
81	PUJANA_ATM_PCC_NETWORK	211	-2.08	0	0.008
82	REACTOME_DNA_REPLICATION	19	-2.05	0.003	0.01
83	REACTOME_ANTIGEN_PROCESSING_CROSS_PRESENTATION	26	-2.01	0	0.012
84	JIANG_VHL_TARGETS	18	-2	0.003	0.014
85	TIEN_INTESTINE_PROBIOTICS_24HR_DN	77	-2	0.005	0.014
86	DEMAGALHAES_AGING_UP	17	-1.99	0.008	0.014
87	CHIANG_LIVER_CANCER_SUBCLASS_UNANNOTATED_DN	41	-1.97	0.004	0.016
88	MCLACHLAN_DENTAL_CARIES_UP	58	-1.97	0.008	0.016
89	REACTOME_MITOCHONDRIAL_TRANSLATION	17	-1.96	0.003	0.016
90	SANA_RESPONSE_TO_IFNG_UP	18	-1.95	0.006	0.018
91	REACTOME_THE_ROLE_OF_GTSE1_IN_G2_M_PROGRESSION_AFTER_G2_CHECKPOINT	18	-1.95	0.005	0.018
92	REACTOME_SWITCHING_OF_ORIGINS_TO_A_POST_REPLICATIVE_STATE	18	-1.95	0	0.017
93	REACTOME_SMOOTH_MUSCLE_CONTRACTION	20	-1.94	0	0.018
94	KEGG_CELL_ADHESION_MOLECULES_CAMS	17	-1.94	0.017	0.018
95	LI_AMPLIFIED_IN_LUNG_CANCER	65	-1.93	0	0.018
96	NAKAYAMA_SOFT_TISSUE_TUMORS_PCA1_UP	27	-1.93	0.003	0.018
97	RHEIN_ALL_GLUCOCORTICOID_THERAPY_DN	104	-1.91	0.006	0.021
98	KEGG_LEISHMANIA_INFECTION	18	-1.9	0.012	0.022
99	KEGG_ANTIGEN_PROCESSING_AND_PRESENTATION	19	-1.89	0.012	0.023
100	SPIELMAN_LYMPHOBLAST_EUROPEAN_VS_ASIAN_UP	112	-1.89	0	0.023
101	LUI_THYROID_CANCER_CLUSTER_3	16	-1.88	0.009	0.025
102	DARWICHE_PAPILLOMA_RISK_LOW_UP	34	-1.88	0.007	0.025
103	PUJANA_CHEK2_PCC_NETWORK	120	-1.86	0	0.026
104	BEIER_GLIOMA_STEM_CELL_DN	15	-1.85	0.012	0.028
105	REACTOME_INTERFERON_GAMMA_SIGNALING	21	-1.84	0.009	0.03
106	HONMA_DOCETAXEL_RESISTANCE	16	-1.84	0.012	0.03
107	BHATI_G2M_ARREST_BY_2METHOXYESTRADIOL_DN	30	-1.84	0.004	0.03
108	FLECHNER_BIOPSY_KIDNEY_TRANSPLANT_REJECTED_VS_OK_UP	22	-1.83	0.015	0.032
109	DANG_BOUND_BY_MYC	220	-1.81	0	0.035
110	REACTOME_MUSCLE_CONTRACTION	39	-1.81	0.014	0.035
111	GARCIA_TARGETS_OF_FLI1_AND_DAX1_DN	18	-1.81	0.021	0.035
112	TIEN_INTESTINE_PROBIOTICS_24HR_UP	113	-1.8	0	0.036
113	ACEVEDO_LIVER_TUMOR_VS_NORMAL_ADJACENT_TISSUE_UP	175	-1.79	0	0.038
114	BHATTACHARYA_EMBRYONIC_STEM_CELL	19	-1.79	0.021	0.038
115	YAO_TEMPORAL_RESPONSE_TO_PROGESTERONE_CLUSTER_9	16	-1.79	0.013	0.038
116	VERHAAK_GLIOBLASTOMA_NEURAL	18	-1.77	0.016	0.041
117	REACTOME_G2_M_CHECKPOINTS	21	-1.77	0.014	0.041
118	KIM_MYC_AMPLIFICATION_TARGETS_UP	39	-1.75	0.016	0.047
119	MANALO_HYPOXIA_DN	26	-1.74	0.01	0.048

## Sheet: 2E
Table S2E. Curated gene sets positively correlated (FDR < 5%) with LAMp in LAM cells.
Rank	Curated genet set	Genes (n)	NES	P value	FDR-adjusted P value
1	REACTOME_EXTRACELLULAR_MATRIX_ORGANIZATION	50	3.52	0	0
2	NABA_MATRISOME	85	3.5	0	0
3	BOQUEST_STEM_CELL_UP	64	3.3	0	0
4	REACTOME_DEGRADATION_OF_THE_EXTRACELLULAR_MATRIX	25	3.24	0	0
5	NABA_CORE_MATRISOME	39	3.21	0	0
6	ZWANG_CLASS_1_TRANSIENTLY_INDUCED_BY_EGF	57	3.15	0	0
7	BLANCO_MELO_COVID19_SARS_COV_2_INFECTION_CALU3_CELLS_UP	38	3.04	0	0
8	NAGASHIMA_NRG1_SIGNALING_UP	38	3.01	0	0
9	KINSEY_TARGETS_OF_EWSR1_FLII_FUSION_DN	65	2.98	0	0
10	REACTOME_COLLAGEN_DEGRADATION	16	2.97	0	0
11	PID_AP1_PATHWAY	19	2.97	0	0
12	PICCALUGA_ANGIOIMMUNOBLASTIC_LYMPHOMA_UP	51	2.95	0	0
13	ANASTASSIOU_MULTICANCER_INVASIVENESS_SIGNATURE	24	2.95	0	0
14	CHIANG_LIVER_CANCER_SUBCLASS_CTNNB1_DN	33	2.93	0	0
15	KIM_GLIS2_TARGETS_UP	30	2.9	0	0
16	TURASHVILI_BREAST_LOBULAR_CARCINOMA_VS_LOBULAR_NORMAL_DN	19	2.87	0	0
17	CHIBA_RESPONSE_TO_TSA_UP	15	2.82	0	0
18	BOQUEST_STEM_CELL_CULTURED_VS_FRESH_UP	86	2.81	0	0
19	BASAKI_YBX1_TARGETS_DN	60	2.79	0	0
20	NABA_ECM_REGULATORS	20	2.78	0	0
21	SCHUETZ_BREAST_CANCER_DUCTAL_INVASIVE_UP	86	2.77	0	0
22	BILD_HRAS_ONCOGENIC_SIGNATURE	41	2.76	0	0
23	PODAR_RESPONSE_TO_ADAPHOSTIN_UP	36	2.75	0	0
24	REACTOME_ECM_PROTEOGLYCANS	15	2.74	0	0
25	NAGASHIMA_EGF_SIGNALING_UP	18	2.7	0	0
26	CASORELLI_ACUTE_PROMYELOCYTIC_LEUKEMIA_UP	36	2.7	0	0
27	CONCANNON_APOPTOSIS_BY_EPOXOMICIN_UP	41	2.7	0	0
28	DURAND_STROMA_S_UP	28	2.69	0	0
29	MILI_PSEUDOPODIA_CHEMOTAXIS_DN	96	2.68	0	0
30	WP_SENESCENCE_AND_AUTOPHAGY_IN_CANCER	19	2.68	0	0
31	WANG_SMARCE1_TARGETS_UP	52	2.67	0	0
32	PHONG_TNF_RESPONSE_NOT_VIA_P38	51	2.67	0	0
33	BENPORATH_ES_WITH_H3K27ME3	51	2.66	0	0
34	SASAI_RESISTANCE_TO_NEOPLASTIC_TRANSFROMATION	15	2.64	0	0
35	MISSIAGLIA_REGULATED_BY_METHYLATION_UP	31	2.64	0	0
36	BLANCO_MELO_COVID19_SARS_COV_2_LOW_MOI_INFECTION_A594_ACE2_EXPRESSING_CELLS_UP	23	2.64	0	0
37	HUMMERICH_SKIN_CANCER_PROGRESSION_UP	19	2.63	0	0
38	GROSS_HYPOXIA_VIA_ELK3_DN	26	2.63	0	0
39	NABA_MATRISOME_ASSOCIATED	46	2.62	0	0
40	MEBARKI_HCC_PROGENITOR_WNT_UP	31	2.61	0	0
41	LIM_MAMMARY_STEM_CELL_UP	73	2.6	0	0
42	ZHU_CMV_ALL_DN	37	2.6	0	0
43	ADDYA_ERYTHROID_DIFFERENTIATION_BY_HEMIN	18	2.6	0	0
44	KAN_RESPONSE_TO_ARSENIC_TRIOXIDE	21	2.6	0	0
45	AMIT_EGF_RESPONSE_40_HELA	15	2.6	0	0
46	SWEET_KRAS_TARGETS_UP	23	2.58	0	0
47	LEE_BMP2_TARGETS_UP	131	2.57	0	0
48	LI_WILMS_TUMOR_VS_FETAL_KIDNEY_1_UP	36	2.57	0	0
49	SENESE_HDAC2_TARGETS_DN	20	2.56	0	0
50	BROCKE_APOPTOSIS_REVERSED_BY_IL6	32	2.56	0	0
51	DUTERTRE_ESTRADIOL_RESPONSE_24HR_DN	74	2.56	0	0
52	CHIARADONNA_NEOPLASTIC_TRANSFORMATION_KRAS_DN	31	2.55	0	0
53	PASINI_SUZ12_TARGETS_DN	66	2.55	0	0
54	KIM_WT1_TARGETS_UP	40	2.55	0	0
55	RUIZ_TNC_TARGETS_UP	42	2.54	0	0
56	SENESE_HDAC1_AND_HDAC2_TARGETS_DN	40	2.54	0	0
57	BLANCO_MELO_COVID19_SARS_COV_2_INFECTION_A594_ACE2_EXPRESSING_CELLS_RUXOLITINIB_UP	34	2.54	0	0
58	WANG_ESOPHAGUS_CANCER_VS_NORMAL_UP	23	2.53	0	0
59	BLANCO_MELO_COVID19_SARS_COV_2_INFECTION_A594_ACE2_EXPRESSING_CELLS_UP	43	2.53	0	0
60	WEST_ADRENOCORTICAL_TUMOR_DN	121	2.53	0	0
61	CHEN_HOXA5_TARGETS_9HR_UP	31	2.52	0	0
62	DANG_REGULATED_BY_MYC_DN	60	2.51	0	0
63	REACTOME_COLLAGEN_FORMATION	15	2.51	0	0
64	WP_ADIPOGENESIS	22	2.51	0	0
65	GERHOLD_ADIPOGENESIS_DN	21	2.5	0	0
66	VERRECCHIA_EARLY_RESPONSE_TO_TGFB1	20	2.5	0	0
67	PHONG_TNF_TARGETS_UP	23	2.5	0	0
68	KOKKINAKIS_METHIONINE_DEPRIVATION_48HR_UP	31	2.5	0	0
69	NABA_ECM_GLYCOPROTEINS	24	2.49	0	0
70	ELVIDGE_HYPOXIA_UP	36	2.49	0	0
71	REACTOME_REGULATION_OF_INSULIN_LIKE_GROWTH_FACTOR_IGF_TRANSPORT_AND_UPTAKE_BY_INSULIN_LIKE_GROWTH_FACTOR_BINDING_PROTEINS_IGFBPS_	19	2.49	0	0
72	RODWELL_AGING_KIDNEY_NO_BLOOD_UP	49	2.46	0	0
73	MIYAGAWA_TARGETS_OF_EWSR1_ETS_FUSIONS_DN	33	2.46	0	0
74	WONG_ADULT_TISSUE_STEM_MODULE	126	2.46	0	0
75	SENESE_HDAC3_TARGETS_UP	68	2.46	0	0
76	WP_IL18_SIGNALING_PATHWAY	41	2.45	0	0
77	GOZGIT_ESR1_TARGETS_DN	83	2.45	0	0
78	TONKS_TARGETS_OF_RUNX1_RUNX1T1_FUSION_HSC_UP	39	2.45	0	0
79	DELACROIX_RARG_BOUND_MEF	44	2.45	0	0
80	KOKKINAKIS_METHIONINE_DEPRIVATION_96HR_UP	31	2.44	0	0
81	RUTELLA_RESPONSE_TO_HGF_UP	76	2.44	0	0
82	DAVICIONI_TARGETS_OF_PAX_FOXO1_FUSIONS_UP	49	2.44	0	0
83	GALINDO_IMMUNE_RESPONSE_TO_ENTEROTOXIN	16	2.44	0	0
84	PID_P53_DOWNSTREAM_PATHWAY	22	2.44	0	0
85	WESTON_VEGFA_TARGETS	17	2.44	0	0
86	GOBERT_OLIGODENDROCYTE_DIFFERENTIATION_DN	121	2.42	0	0
87	BROWNE_HCMV_INFECTION_4HR_DN	24	2.42	0	0
88	CROONQUIST_STROMAL_STIMULATION_UP	18	2.41	0	0
89	RODRIGUES_THYROID_CARCINOMA_POORLY_DIFFERENTIATED_DN	105	2.41	0	0
90	REACTOME_DISEASES_OF_GLYCOSYLATION	16	2.41	0.002	0
91	MARTORIATI_MDM4_TARGETS_FETAL_LIVER_DN	79	2.4	0	0
92	MCCLUNG_CREB1_TARGETS_UP	19	2.39	0	0
93	BERENJENO_TRANSFORMED_BY_RHOA_DN	92	2.39	0	0
94	TONKS_TARGETS_OF_RUNX1_RUNX1T1_FUSION_ERYTHROCYTE_UP	31	2.38	0	0.001
95	OSWALD_HEMATOPOIETIC_STEM_CELL_IN_COLLAGEN_GEL_UP	45	2.37	0	0.001
96	PETROVA_ENDOTHELIUM_LYMPHATIC_VS_BLOOD_DN	34	2.37	0	0.001
97	PLASARI_TGFB1_TARGETS_10HR_DN	40	2.37	0	0.001
98	ALTEMEIER_RESPONSE_TO_LPS_WITH_MECHANICAL_VENTILATION	19	2.35	0.001	0.001
99	ENK_UV_RESPONSE_EPIDERMIS_DN	73	2.35	0	0.001
100	CROONQUIST_NRAS_VS_STROMAL_STIMULATION_DN	24	2.35	0	0.001
101	CHEN_METABOLIC_SYNDROM_NETWORK	149	2.35	0	0.001
102	GAUSSMANN_MLL_AF4_FUSION_TARGETS_G_UP	21	2.35	0	0.001
103	CHARAFE_BREAST_CANCER_LUMINAL_VS_MESENCHYMAL_DN	68	2.34	0	0.001
104	WP_TGFBETA_SIGNALING_PATHWAY	19	2.34	0	0.001
105	BAELDE_DIABETIC_NEPHROPATHY_DN	79	2.34	0	0.001
106	GRUETZMANN_PANCREATIC_CANCER_UP	76	2.34	0	0.001
107	WINTER_HYPOXIA_METAGENE	42	2.33	0	0.001
108	SHEPARD_BMYB_MORPHOLINO_DN	27	2.33	0	0.001
109	SERVITJA_ISLET_HNF1A_TARGETS_UP	33	2.33	0	0.001
110	LEE_NEURAL_CREST_STEM_CELL_UP	22	2.32	0	0.001
111	LANDIS_BREAST_CANCER_PROGRESSION_DN	15	2.32	0	0.001
112	GERY_CEBP_TARGETS	29	2.31	0	0.001
113	PILON_KLF1_TARGETS_UP	60	2.31	0	0.001
114	HELLER_HDAC_TARGETS_SILENCED_BY_METHYLATION_UP	67	2.31	0	0.001
115	ODONNELL_TFRC_TARGETS_UP	52	2.31	0	0.001
116	AMIT_EGF_RESPONSE_120_HELA	15	2.3	0	0.001
117	PICCALUGA_ANGIOIMMUNOBLASTIC_LYMPHOMA_DN	22	2.3	0	0.001
118	JECHLINGER_EPITHELIAL_TO_MESENCHYMAL_TRANSITION_DN	19	2.29	0	0.001
119	ONDER_CDH1_TARGETS_2_UP	51	2.29	0	0.001
120	KOINUMA_TARGETS_OF_SMAD2_OR_SMAD3	109	2.29	0	0.001
121	ZHONG_RESPONSE_TO_AZACITIDINE_AND_TSA_UP	26	2.28	0	0.001
122	RUTELLA_RESPONSE_TO_HGF_VS_CSF2RB_AND_IL4_UP	78	2.28	0	0.001
123	KAYO_CALORIE_RESTRICTION_MUSCLE_UP	21	2.27	0.001	0.001
124	GOTZMANN_EPITHELIAL_TO_MESENCHYMAL_TRANSITION_UP	18	2.27	0	0.001
125	RIGGI_EWING_SARCOMA_PROGENITOR_DN	27	2.26	0	0.002
126	IZADPANAH_STEM_CELL_ADIPOSE_VS_BONE_UP	15	2.26	0	0.002
127	WILCOX_RESPONSE_TO_PROGESTERONE_DN	16	2.25	0	0.002
128	HELLEBREKERS_SILENCED_DURING_TUMOR_ANGIOGENESIS	22	2.25	0	0.002
129	SABATES_COLORECTAL_ADENOMA_DN	26	2.25	0.004	0.002
130	KEGG_FOCAL_ADHESION	36	2.25	0	0.002
131	HARRIS_HYPOXIA	17	2.24	0	0.002
132	ZWANG_CLASS_3_TRANSIENTLY_INDUCED_BY_EGF	25	2.24	0	0.002
133	RIGGINS_TAMOXIFEN_RESISTANCE_DN	32	2.23	0	0.002
134	MEBARKI_HCC_PROGENITOR_FZD8CRD_DN	28	2.23	0	0.002
135	MEBARKI_HCC_PROGENITOR_WNT_UP_BLOCKED_BY_FZD8CRD	22	2.23	0	0.002
136	SARRIO_EPITHELIAL_MESENCHYMAL_TRANSITION_DN	37	2.21	0	0.002
137	MCBRYAN_PUBERTAL_TGFB1_TARGETS_UP	39	2.21	0	0.002
138	SENGUPTA_NASOPHARYNGEAL_CARCINOMA_UP	29	2.21	0.001	0.002
139	PECE_MAMMARY_STEM_CELL_DN	27	2.21	0.001	0.002
140	WANG_MLL_TARGETS	33	2.21	0.001	0.002
141	WU_CELL_MIGRATION	31	2.19	0	0.003
142	WP_BREAST_CANCER_PATHWAY	19	2.19	0	0.003
143	GARGALOVIC_RESPONSE_TO_OXIDIZED_PHOSPHOLIPIDS_TURQUOISE_UP	15	2.19	0	0.003
144	ELVIDGE_HYPOXIA_BY_DMOG_UP	29	2.18	0.001	0.003
145	MCBRYAN_PUBERTAL_BREAST_4_5WK_UP	38	2.18	0	0.003
146	ZHOU_INFLAMMATORY_RESPONSE_LIVE_UP	36	2.18	0	0.003
147	MARTINEZ_RB1_TARGETS_UP	98	2.18	0	0.003
148	SENESE_HDAC1_TARGETS_UP	54	2.16	0.001	0.004
149	WOO_LIVER_CANCER_RECURRENCE_UP	18	2.16	0	0.004
150	JECHLINGER_EPITHELIAL_TO_MESENCHYMAL_TRANSITION_UP	18	2.16	0	0.004
151	VART_KSHV_INFECTION_ANGIOGENIC_MARKERS_UP	18	2.15	0	0.004
152	REACTOME_SIGNALING_BY_PDGF	15	2.14	0	0.004
153	PHONG_TNF_RESPONSE_VIA_P38_PARTIAL	20	2.14	0.003	0.004
154	KARLSSON_TGFB1_TARGETS_DN	50	2.14	0.003	0.004
155	CHICAS_RB1_TARGETS_GROWING	34	2.13	0.001	0.005
156	BURTON_ADIPOGENESIS_8	22	2.12	0.001	0.005
157	WONG_ENDMETRIUM_CANCER_DN	16	2.12	0.002	0.005
158	MEISSNER_BRAIN_HCP_WITH_H3K4ME3_AND_H3K27ME3	68	2.12	0.001	0.005
159	SMID_BREAST_CANCER_BASAL_DN	71	2.12	0	0.005
160	WP_SPINAL_CORD_INJURY	20	2.11	0.003	0.005
161	HORIUCHI_WTAP_TARGETS_UP	39	2.11	0	0.005
162	FULCHER_INFLAMMATORY_RESPONSE_LECTIN_VS_LPS_DN	64	2.11	0	0.005
163	CHEN_LVAD_SUPPORT_OF_FAILING_HEART_UP	28	2.11	0.001	0.005
164	QI_PLASMACYTOMA_DN	21	2.11	0.001	0.005
165	DELYS_THYROID_CANCER_DN	35	2.1	0	0.006
166	BURTON_ADIPOGENESIS_PEAK_AT_0HR	17	2.1	0	0.006
167	NUYTTEN_NIPP1_TARGETS_UP	84	2.09	0	0.006
168	TAKEDA_TARGETS_OF_NUP98_HOXA9_FUSION_3D_UP	27	2.09	0.001	0.006
169	LIM_MAMMARY_LUMINAL_MATURE_DN	26	2.09	0	0.006
170	VECCHI_GASTRIC_CANCER_ADVANCED_VS_EARLY_UP	30	2.08	0.003	0.006
171	BURTON_ADIPOGENESIS_9	22	2.08	0.001	0.006
172	WP_ONCOSTATIN_M_SIGNALING_PATHWAY	16	2.07	0	0.007
173	FEVR_CTNNB1_TARGETS_UP	78	2.06	0	0.007
174	REACTOME_CELL_SURFACE_INTERACTIONS_AT_THE_VASCULAR_WALL	15	2.06	0.002	0.007
175	KEGG_LYSOSOME	29	2.06	0.004	0.008
176	NUYTTEN_EZH2_TARGETS_UP	134	2.05	0	0.008
177	BUYTAERT_PHOTODYNAMIC_THERAPY_STRESS_UP	112	2.05	0.001	0.008
178	TSENG_IRS1_TARGETS_DN	19	2.05	0.006	0.008
179	RUTELLA_RESPONSE_TO_CSF2RB_AND_IL4_UP	58	2.05	0	0.008
180	IGLESIAS_E2F_TARGETS_UP	51	2.04	0.001	0.008
181	CHANDRAN_METASTASIS_DN	50	2.04	0	0.008
182	DACOSTA_UV_RESPONSE_VIA_ERCC3_DN	102	2.04	0.001	0.008
183	WATANABE_RECTAL_CANCER_RADIOTHERAPY_RESPONSIVE_DN	23	2.04	0.004	0.009
184	HELLER_SILENCED_BY_METHYLATION_DN	18	2.04	0.004	0.009
185	LIAO_METASTASIS	56	2.03	0	0.009
186	GROSS_HYPOXIA_VIA_ELK3_AND_HIF1A_UP	25	2.03	0	0.009
187	FOSTER_TOLERANT_MACROPHAGE_DN	46	2.03	0.001	0.009
188	HAN_SATB1_TARGETS_UP	53	2.03	0.003	0.009
189	WP_NUCLEAR_RECEPTORS_METAPATHWAY	38	2.02	0.004	0.009
190	HELLER_HDAC_TARGETS_UP	41	2.01	0.004	0.01
191	ALCALAY_AML_BY_NPM1_LOCALIZATION_UP	21	2.01	0	0.01
192	MITSIADES_RESPONSE_TO_APLIDIN_UP	57	2.01	0.003	0.01
193	HOLLERN_EMT_BREAST_TUMOR_UP	21	2	0.006	0.011
194	LINDGREN_BLADDER_CANCER_CLUSTER_2B	82	2	0	0.011
195	LIAN_LIPA_TARGETS_6M	20	2	0.003	0.012
196	REACTOME_SIGNALING_BY_RECEPTOR_TYROSINE_KINASES	79	2	0.001	0.012
197	BERENJENO_ROCK_SIGNALING_NOT_VIA_RHOA_DN	19	2	0.003	0.011
198	TURASHVILI_BREAST_LOBULAR_CARCINOMA_VS_DUCTAL_NORMAL_UP	16	1.99	0.003	0.012
199	REACTOME_SIGNALING_BY_GPCR	35	1.99	0.003	0.012
200	DIRMEIER_LMP1_RESPONSE_EARLY	20	1.98	0	0.012
201	SENESE_HDAC1_TARGETS_DN	46	1.98	0.003	0.012
202	DACOSTA_UV_RESPONSE_VIA_ERCC3_COMMON_DN	62	1.98	0.004	0.013
203	INGRAM_SHH_TARGETS_UP	24	1.98	0.003	0.013
204	GAJATE_RESPONSE_TO_TRABECTEDIN_UP	17	1.98	0.001	0.013
205	LIU_PROSTATE_CANCER_DN	93	1.98	0	0.013
206	WP_FOCAL_ADHESION	35	1.98	0.005	0.013
207	HAMAI_APOPTOSIS_VIA_TRAIL_DN	18	1.97	0.012	0.013
208	SHEPARD_CRUSH_AND_BURN_MUTANT_UP	35	1.97	0.004	0.014
209	TONKS_TARGETS_OF_RUNX1_RUNX1T1_FUSION_SUSTAINDED_IN_ERYTHROCYTE_UP	15	1.96	0.002	0.015
210	HOSHIDA_LIVER_CANCER_LATE_RECURRENCE_UP	17	1.96	0.002	0.015
211	MATSUDA_NATURAL_KILLER_DIFFERENTIATION	58	1.95	0.004	0.015
212	BENPORATH_EED_TARGETS	58	1.95	0.003	0.015
213	RODRIGUES_DCC_TARGETS_DN	20	1.95	0.003	0.015
214	MARKEY_RB1_CHRONIC_LOF_DN	26	1.95	0.006	0.015
215	KRIEG_HYPOXIA_NOT_VIA_KDM3A	89	1.95	0	0.016
216	LEI_MYB_TARGETS	72	1.95	0.006	0.016
217	OISHI_CHOLANGIOMA_STEM_CELL_LIKE_DN	51	1.95	0.001	0.016
218	CHARAFE_BREAST_CANCER_LUMINAL_VS_BASAL_UP	26	1.94	0.006	0.016
219	GOZGIT_ESR1_TARGETS_UP	16	1.94	0.003	0.016
220	JAEGER_METASTASIS_DN	17	1.94	0.009	0.016
221	CAIRO_HEPATOBLASTOMA_CLASSES_DN	32	1.94	0.008	0.017
222	NADLER_OBESITY_UP	24	1.93	0.001	0.017
223	KIM_WT1_TARGETS_DN	54	1.93	0.003	0.017
224	SCHAEFFER_PROSTATE_DEVELOPMENT_48HR_DN	57	1.93	0	0.017
225	WP_PI3KAKT_SIGNALING_PATHWAY	29	1.93	0.007	0.018
226	LEE_LIVER_CANCER_ACOX1_UP	16	1.93	0.003	0.018
227	HIRSCH_CELLULAR_TRANSFORMATION_SIGNATURE_UP	38	1.92	0.003	0.018
228	MANALO_HYPOXIA_UP	32	1.92	0.004	0.018
229	RUTELLA_RESPONSE_TO_CSF2RB_AND_IL4_DN	54	1.92	0.005	0.018
230	TURASHVILI_BREAST_DUCTAL_CARCINOMA_VS_DUCTAL_NORMAL_DN	23	1.92	0.003	0.018
231	BENPORATH_SUZ12_TARGETS	47	1.92	0.005	0.019
232	RADMACHER_AML_PROGNOSIS	17	1.92	0	0.019
233	JACKSON_DNMT1_TARGETS_UP	20	1.91	0.001	0.019
234	OSMAN_BLADDER_CANCER_UP	82	1.91	0.001	0.02
235	LANDIS_ERBB2_BREAST_TUMORS_324_DN	32	1.91	0.012	0.02
236	JINESH_BLEBBISHIELD_TO_IMMUNE_CELL_FUSION_PBSHMS_UP	57	1.9	0.004	0.02
237	CHANDRAN_METASTASIS_UP	32	1.9	0.01	0.02
238	MILI_PSEUDOPODIA_HAPTOTAXIS_DN	101	1.9	0	0.02
239	PAL_PRMT5_TARGETS_UP	37	1.9	0.004	0.02
240	REN_ALVEOLAR_RHABDOMYOSARCOMA_DN	94	1.9	0.001	0.02
241	HAN_SATB1_TARGETS_DN	50	1.9	0.008	0.02
242	SMIRNOV_CIRCULATING_ENDOTHELIOCYTES_IN_CANCER_UP	31	1.9	0.006	0.02
243	CREIGHTON_ENDOCRINE_THERAPY_RESISTANCE_5	60	1.9	0.001	0.021
244	JOHNSTONE_PARVB_TARGETS_3_UP	87	1.9	0.004	0.021
245	MIKKELSEN_MEF_LCP_WITH_H3K4ME3	20	1.89	0.009	0.021
246	ZHU_CMV_24_HR_DN	25	1.89	0.001	0.021
247	KRIGE_RESPONSE_TO_TOSEDOSTAT_24HR_UP	88	1.89	0.004	0.021
248	BLALOCK_ALZHEIMERS_DISEASE_UP	254	1.89	0	0.021
249	SMID_BREAST_CANCER_LUMINAL_B_DN	61	1.89	0.009	0.022
250	CHICAS_RB1_TARGETS_CONFLUENT	101	1.89	0.001	0.022
251	NAKAMURA_ADIPOGENESIS_LATE_UP	20	1.88	0.01	0.022
252	SERVITJA_LIVER_HNF1A_TARGETS_UP	15	1.88	0.003	0.022
253	BROWNE_HCMV_INFECTION_48HR_DN	69	1.88	0.004	0.022
254	WNT_SIGNALING	15	1.88	0.009	0.022
255	YAO_TEMPORAL_RESPONSE_TO_PROGESTERONE_CLUSTER_16	21	1.87	0.007	0.023
256	RIGGI_EWING_SARCOMA_PROGENITOR_UP	41	1.87	0.005	0.023
257	REACTOME_DISEASES_OF_METABOLISM	27	1.87	0.011	0.023
258	SUNG_METASTASIS_STROMA_UP	27	1.87	0.007	0.023
259	COATES_MACROPHAGE_M1_VS_M2_UP	16	1.87	0.007	0.023
260	TAKEDA_TARGETS_OF_NUP98_HOXA9_FUSION_16D_UP	16	1.87	0.005	0.023
261	AMUNDSON_RESPONSE_TO_ARSENITE	39	1.87	0.012	0.024
262	REACTOME_UNFOLDED_PROTEIN_RESPONSE_UPR_	15	1.86	0.006	0.025
263	SWEET_LUNG_CANCER_KRAS_DN	67	1.86	0.006	0.025
264	MARKEY_RB1_CHRONIC_LOF_UP	17	1.86	0.006	0.025
265	NEMETH_INFLAMMATORY_RESPONSE_LPS_UP	17	1.85	0.01	0.026
266	LEE_NEURAL_CREST_STEM_CELL_DN	16	1.85	0.009	0.026
267	SMID_BREAST_CANCER_LUMINAL_A_UP	18	1.84	0.009	0.028
268	LENAOUR_DENDRITIC_CELL_MATURATION_UP	22	1.84	0.012	0.028
269	EBAUER_TARGETS_OF_PAX3_FOXO1_FUSION_UP	23	1.83	0.013	0.03
270	WP_EPITHELIAL_TO_MESENCHYMAL_TRANSITION_IN_COLORECTAL_CANCER	16	1.83	0.005	0.03
271	VERHAAK_AML_WITH_NPM1_MUTATED_DN	26	1.82	0.006	0.032
272	LIAN_LIPA_TARGETS_3M	18	1.82	0.013	0.033
273	RODRIGUES_THYROID_CARCINOMA_ANAPLASTIC_DN	75	1.82	0.005	0.033
274	PEDRIOLI_MIR31_TARGETS_DN	27	1.82	0.011	0.033
275	ZHOU_INFLAMMATORY_RESPONSE_FIMA_DN	15	1.82	0.014	0.033
276	KATSANOU_ELAVL1_TARGETS_UP	27	1.81	0.014	0.033
277	RUTELLA_RESPONSE_TO_HGF_VS_CSF2RB_AND_IL4_DN	34	1.81	0.008	0.034
278	DELYS_THYROID_CANCER_UP	75	1.81	0.004	0.034
279	GAUSSMANN_MLL_AF4_FUSION_TARGETS_F_UP	28	1.81	0.015	0.034
280	YAMAZAKI_TCEB3_TARGETS_UP	30	1.81	0.013	0.034
281	STARK_PREFRONTAL_CORTEX_22Q11_DELETION_UP	22	1.81	0.023	0.034
282	CHARAFE_BREAST_CANCER_LUMINAL_VS_BASAL_DN	65	1.81	0.012	0.034
283	JINESH_BLEBBISHIELD_TO_IMMUNE_CELL_FUSION_PBSHMS_DN	42	1.81	0.006	0.035
284	NAKAMURA_TUMOR_ZONE_PERIPHERAL_VS_CENTRAL_DN	96	1.81	0.007	0.034
285	KIM_WT1_TARGETS_8HR_UP	35	1.8	0.009	0.035
286	PEREZ_TP53_TARGETS	67	1.8	0.01	0.036
287	MIKKELSEN_NPC_ICP_WITH_H3K4ME3	38	1.8	0.008	0.036
288	CUI_TCF21_TARGETS_2_UP	67	1.8	0.005	0.036
289	GAUSSMANN_MLL_AF4_FUSION_TARGETS_A_UP	21	1.8	0.019	0.036
290	SENGUPTA_NASOPHARYNGEAL_CARCINOMA_WITH_LMP1_UP	53	1.79	0.016	0.038
291	WP_NONALCOHOLIC_FATTY_LIVER_DISEASE	31	1.79	0.014	0.038
292	LI_INDUCED_T_TO_NATURAL_KILLER_DN	17	1.79	0.014	0.038
293	IZADPANAH_STEM_CELL_ADIPOSE_VS_BONE_DN	17	1.78	0.019	0.039
294	WHITFIELD_CELL_CYCLE_G2_M	23	1.78	0.01	0.039
295	PEREZ_TP63_TARGETS	19	1.78	0.021	0.039
296	WP_GASTRIN_SIGNALING_PATHWAY	17	1.78	0.015	0.039
297	WP_OXIDATIVE_PHOSPHORYLATION	15	1.78	0.014	0.039
298	PASQUALUCCI_LYMPHOMA_BY_GC_STAGE_UP	40	1.78	0.008	0.04
299	ODONNELL_TARGETS_OF_MYC_AND_TFRC_UP	17	1.78	0.015	0.04
300	WP_HIPPOMERLIN_SIGNALING_DYSREGULATION	15	1.77	0.025	0.041
301	MARTINEZ_RB1_AND_TP53_TARGETS_UP	92	1.77	0.002	0.041
302	DAZARD_RESPONSE_TO_UV_SCC_UP	19	1.77	0.022	0.041
303	RAO_BOUND_BY_SALL4	25	1.77	0.008	0.041
304	GENTILE_UV_HIGH_DOSE_DN	44	1.77	0.015	0.041
305	REACTOME_SIGNALING_BY_INTERLEUKINS	53	1.77	0.005	0.042
306	MULLIGHAN_NPM1_SIGNATURE_3_UP	35	1.77	0.014	0.042
307	VANHARANTA_UTERINE_FIBROID_DN	15	1.76	0.028	0.042
308	KEGG_MAPK_SIGNALING_PATHWAY	29	1.76	0.018	0.042
309	KEGG_OXIDATIVE_PHOSPHORYLATION	35	1.76	0.015	0.043
310	MARTINEZ_TP53_TARGETS_UP	89	1.76	0.007	0.043
311	KASLER_HDAC7_TARGETS_1_UP	20	1.76	0.022	0.044
312	GRESHOCK_CANCER_COPY_NUMBER_UP	38	1.76	0.018	0.044
313	POOLA_INVASIVE_BREAST_CANCER_DN	19	1.75	0.016	0.045
314	WIERENGA_STAT5A_TARGETS_UP	22	1.75	0.012	0.046
315	REACTOME_SIGNALING_BY_NTRKS	22	1.74	0.023	0.047
316	ZHOU_INFLAMMATORY_RESPONSE_FIMA_UP	39	1.74	0.012	0.048
317	BERTUCCI_MEDULLARY_VS_DUCTAL_BREAST_CANCER_DN	32	1.74	0.023	0.048
318	DAZARD_RESPONSE_TO_UV_NHEK_DN	30	1.74	0.017	0.048
319	DURAND_STROMA_NS_UP	15	1.74	0.027	0.049

## Sheet: 2F
Table S2F. Curated gene sets negatively correlated (FDR < 5%) with LAMp in LAM cells.
Rank	Curated gene set	Genes (n)	NES	P value	FDR-adjusted P value
1	REACTOME_EUKARYOTIC_TRANSLATION_ELONGATION	73	-6.06	0	0
2	REACTOME_EUKARYOTIC_TRANSLATION_INITIATION	81	-6	0	0
3	KEGG_RIBOSOME	69	-5.91	0	0
4	WP_CYTOPLASMIC_RIBOSOMAL_PROTEINS	68	-5.77	0	0
5	REACTOME_RESPONSE_OF_EIF2AK4_GCN2_TO_AMINO_ACID_DEFICIENCY	71	-5.76	0	0
6	REACTOME_SELENOAMINO_ACID_METABOLISM	73	-5.75	0	0
7	REACTOME_SRP_DEPENDENT_COTRANSLATIONAL_PROTEIN_TARGETING_TO_MEMBRANE	77	-5.67	0	0
8	REACTOME_NONSENSE_MEDIATED_DECAY_NMD_	75	-5.58	0	0
9	REACTOME_METABOLISM_OF_AMINO_ACIDS_AND_DERIVATIVES	100	-5.51	0	0
10	REACTOME_REGULATION_OF_EXPRESSION_OF_SLITS_AND_ROBOS	85	-5.43	0	0
11	REACTOME_SIGNALING_BY_ROBO_RECEPTORS	90	-5.33	0	0
12	REACTOME_RRNA_PROCESSING	84	-5.28	0	0
13	REACTOME_INFLUENZA_INFECTION	82	-5.24	0	0
14	REACTOME_TRANSLATION	113	-5.07	0	0
15	BILANGES_SERUM_AND_RAPAMYCIN_SENSITIVE_GENES	41	-4.81	0	0
16	REACTOME_ACTIVATION_OF_THE_MRNA_UPON_BINDING_OF_THE_CAP_BINDING_COMPLEX_AND_EIFS_AND_SUBSEQUENT_BINDING_TO_43S	38	-4.25	0	0
17	REACTOME_CELLULAR_RESPONSES_TO_EXTERNAL_STIMULI	141	-4.03	0	0
18	REACTOME_METABOLISM_OF_RNA	165	-4.02	0	0
19	HSIAO_HOUSEKEEPING_GENES	160	-4	0	0
20	REACTOME_NERVOUS_SYSTEM_DEVELOPMENT	129	-3.86	0	0
21	CHNG_MULTIPLE_MYELOMA_HYPERPLOID_UP	31	-3.73	0	0
22	REACTOME_INFECTIOUS_DISEASE	158	-3.59	0	0
23	PECE_MAMMARY_STEM_CELL_UP	57	-3.42	0	0
24	OSMAN_BLADDER_CANCER_DN	77	-3.32	0	0
25	YAMASHITA_LIVER_CANCER_WITH_EPCAM_UP	19	-3.26	0	0
26	JISON_SICKLE_CELL_DISEASE_DN	55	-3.21	0	0
27	CAIRO_HEPATOBLASTOMA_CLASSES_UP	96	-3.07	0	0
28	BILANGES_RAPAMYCIN_SENSITIVE_VIA_TSC1_AND_TSC2	23	-2.91	0	0
29	MARTENS_TRETINOIN_RESPONSE_DN	148	-2.9	0	0
30	REACTOME_DEVELOPMENTAL_BIOLOGY	158	-2.88	0	0
31	TIEN_INTESTINE_PROBIOTICS_6HR_UP	26	-2.84	0	0
32	PUJANA_ATM_PCC_NETWORK	184	-2.83	0	0
33	PUJANA_BRCA1_PCC_NETWORK	239	-2.82	0	0
34	POMEROY_MEDULLOBLASTOMA_PROGNOSIS_DN	15	-2.72	0	0
35	NUTT_GBM_VS_AO_GLIOMA_DN	15	-2.61	0	0
36	WANG_TUMOR_INVASIVENESS_UP	99	-2.6	0	0
37	DANG_MYC_TARGETS_UP	40	-2.59	0	0
38	WP_TRANSLATION_FACTORS	17	-2.57	0	0
39	MALONEY_RESPONSE_TO_17AAG_DN	27	-2.52	0	0.001
40	REACTOME_TCR_SIGNALING	21	-2.51	0	0.001
41	REACTOME_DISEASE	221	-2.48	0	0.001
42	LEE_LIVER_CANCER_SURVIVAL_DN	48	-2.48	0	0.001
43	DIAZ_CHRONIC_MEYLOGENOUS_LEUKEMIA_DN	24	-2.45	0	0.001
44	DAZARD_UV_RESPONSE_CLUSTER_G1	22	-2.43	0	0.001
45	FLOTHO_PEDIATRIC_ALL_THERAPY_RESPONSE_UP	25	-2.39	0	0.001
46	BENPORATH_MYC_MAX_TARGETS	140	-2.37	0	0.002
47	ANDERSEN_LIVER_CANCER_KRT19_UP	17	-2.34	0	0.002
48	BOUDOUKHA_BOUND_BY_IGF2BP2	26	-2.31	0.004	0.002
49	KIM_BIPOLAR_DISORDER_OLIGODENDROCYTE_DENSITY_CORR_UP	153	-2.27	0	0.004
50	MODY_HIPPOCAMPUS_PRENATAL	19	-2.24	0	0.005
51	TONG_INTERACT_WITH_PTTG1	16	-2.23	0	0.005
52	DANG_BOUND_BY_MYC	185	-2.22	0	0.005
53	WP_ALLOGRAFT_REJECTION	15	-2.21	0.008	0.005
54	ICHIBA_GRAFT_VERSUS_HOST_DISEASE_35D_UP	29	-2.21	0.003	0.005
55	TAKAO_RESPONSE_TO_UVB_RADIATION_UP	33	-2.19	0	0.006
56	STARK_PREFRONTAL_CORTEX_22Q11_DELETION_DN	107	-2.17	0	0.006
57	REACTOME_CELL_CYCLE_CHECKPOINTS	27	-2.16	0.003	0.007
58	WONG_MITOCHONDRIA_GENE_MODULE	47	-2.09	0	0.01
59	LI_AMPLIFIED_IN_LUNG_CANCER	65	-2.09	0	0.01
60	DAIRKEE_CANCER_PRONE_RESPONSE_BPA_E2	19	-2.03	0.006	0.014
61	REACTOME_G2_M_CHECKPOINTS	18	-2.02	0.006	0.016
62	KEGG_SYSTEMIC_LUPUS_ERYTHEMATOSUS	17	-2.02	0.011	0.016
63	LINDGREN_BLADDER_CANCER_CLUSTER_1_UP	22	-2	0.003	0.016
64	PUJANA_CHEK2_PCC_NETWORK	118	-1.99	0	0.018
65	KIM_ALL_DISORDERS_OLIGODENDROCYTE_NUMBER_CORR_UP	147	-1.99	0	0.017
66	WONG_EMBRYONIC_STEM_CELL_CORE	65	-1.96	0	0.02
67	HILLION_HMGA1B_TARGETS	21	-1.9	0.01	0.029
68	BHATTACHARYA_EMBRYONIC_STEM_CELL	21	-1.89	0.003	0.03
69	KIM_MYC_AMPLIFICATION_TARGETS_UP	40	-1.88	0.008	0.032
70	TIEN_INTESTINE_PROBIOTICS_24HR_DN	65	-1.87	0	0.033
71	ABE_INNER_EAR	17	-1.87	0.011	0.033
72	SANSOM_APC_TARGETS_REQUIRE_MYC	22	-1.85	0.01	0.037
73	REACTOME_DNA_REPLICATION	15	-1.84	0.014	0.038
74	JIANG_VHL_TARGETS	21	-1.83	0.009	0.039
75	MOOTHA_VOXPHOS	16	-1.81	0.019	0.044
76	YAGI_AML_WITH_INV_16_TRANSLOCATION	62	-1.79	0.009	0.048
77	REACTOME_ANTIGEN_PROCESSING_CROSS_PRESENTATION	21	-1.79	0.018	0.048

## Sheet: 2G
Table S2G. Overexpressed genes (n = 50) in depicted six cancer cell lines and LAM cells, relative to all other cancer cell lines analyzed.
Gene symbol	Gene name	LAMp	LAMcore
ACTA2	Actin, alpha 2, smooth muscle, aorta	Included	Included
ACTB	Actin beta	Not included	Not included
B2M	Beta-2-microglobulin	Not included	Not included
BIN1	Bridging integrator 1	Not included	Included
C6orf48	Chromosome 6 open reading frame 48	Not included	Not included
CAPZB	Capping actin protein of muscle Z-line beta subunit	Not included	Not included
CCL2	C-C motif chemokine ligand 2	Not included	Not included
CD151	CD151 molecule (Raph blood group)	Not included	Not included
CEBPB	CCAAT/enhancer binding protein beta	Not included	Not included
CISD1	CDGSH iron sulfur domain 1	Not included	Not included
COL1A1	Collagen type I alpha 1 chain	Not included	Included
COL1A2	Collagen type I alpha 2 chain	Not included	Included
COL6A1	Collagen type VI alpha 1 chain	Not included	Included
COL6A2	Collagen type VI alpha 2 chain	Not included	Included
CREB3L1	cAMP responsive element binding protein 3 like 1	Not included	Not included
CRTAP	Cartilage associated protein	Not included	Not included
CUTA	CutA divalent cation tolerance homolog	Not included	Not included
CYR61	Cysteine rich angiogenic inducer 61	Not included	Included
EEF2	Eukaryotic translation elongation factor 2	Not included	Not included
EFEMP2	EGF containing fibulin like extracellular matrix protein 2	Not included	Included
EMP3	Epithelial membrane protein 3	Not included	Not included
FBXO32	F-box protein 32	Not included	Included
FTL	Ferritin light chain	Not included	Not included
GLIPR1	GLI pathogenesis related 1	Not included	Not included
GSTO1	Glutathione S-transferase omega 1	Not included	Not included
HLA-B	Major histocompatibility complex, class I, B	Not included	Not included
HTRA1	HtrA serine peptidase 1	Not included	Included
LDHB	Lactate dehydrogenase B	Not included	Not included
MMP2	Matrix metallopeptidase 2	Included	Included
MRFAP1	Morf4 family associated protein 1	Not included	Not included
MYL9	Myosin light chain 9	Not included	Included
NUPR1	Nuclear protein 1, transcriptional regulator	Not included	Not included
PDLIM7	PDZ and LIM domain 7	Not included	Included
PGRMC1	Progesterone receptor membrane component 1	Not included	Included
RAP1B	RAP1B, member of RAS oncogene family	Not included	Not included
RARRES2	Retinoic acid receptor responder 2	Not included	Included
RPL21	Ribosomal protein L21	Not included	Not included
RPL5	Ribosomal protein L5	Not included	Not included
RPL9	Ribosomal protein L9	Not included	Not included
SAP18	Sin3A associated protein 18	Not included	Not included
SELM	Selenoprotein M	Not included	Not included
SNX3	Sorting nexin 3(SNX3)	Not included	Not included
SOD2	Superoxide dismutase 2, mitochondrial	Not included	Not included
SPARC	Secreted protein acidic and cysteine rich	Not included	Included
SPON2	Spondin 2	Not included	Included
SQSTM1	Sequestosome 1	Not included	Not included
TAGLN	Transgelin	Not included	Included
TPM1	Tropomyosin 1 (alpha)	Not included	Included
TPM2	Tropomyosin 2 (beta)	Not included	Included
UBB	Ubiquitin B	Not included	Not included

## Sheet: 2H
Table S2H. Overrepresented GO terms and KEGG pathways in the 50 genes commonly overexpressed in the six cancer cell lines and LAM cells.
GO/KEGG	Term/pathway	ID	P value adjusted	-log10 P value adjusted	Term size (n genes)	Query size (n genes)	Intersection size (n genes)	Genes in set
GO:MF	structural molecule activity	GO:0005198	6.24774e-07	6.20428	698	48	14	MYL9,TPM2,COL1A2,TPM1,ACTB,EFEMP2,RPL9,COL6A2,CYR61,RPL21,RPL5,COL1A1,COL6A1,SPARC
GO:MF	extracellular matrix structural constituent	GO:0005201	0.000109741	3.95963	169	48	7	COL1A2,EFEMP2,COL6A2,CYR61,COL1A1,COL6A1,SPARC
GO:MF	protein-containing complex binding	GO:0044877	0.000190502	3.7201	1282	48	15	TAGLN,TPM2,TPM1,ACTB,COL6A2,CYR61,CD151,RAP1B,BIN1,CRTAP,CAPZB,COL6A1,SQSTM1,EEF2,SPARC
GO:MF	platelet-derived growth factor binding	GO:0048407	0.0012074	2.91815	11	48	3	COL1A2,COL1A1,COL6A1
GO:MF	extracellular matrix structural constituent conferring tensile strength	GO:0030020	0.00168824	2.77257	41	48	4	COL1A2,COL6A2,COL1A1,COL6A1
GO:MF	protein binding	GO:0005515	0.00531748	2.27429	14752	48	48	RARRES2,ACTA2,NUPR1,TAGLN,MYL9,B2M,SPON2,TPM2,FTL,COL1A2,TPM1,ACTB,HLA-B,MMP2,EFEMP2,CISD1,RPL9,COL6A2,UBB,CYR61,RPL21,FBXO32,RPL5,HTRA1,COL1A1,PDLIM7,CD151,RAP1B,GSTO1,BIN1,CREB3L1,CRTAP,PGRMC1,MRFAP1,SOD2,SAP18,EMP3,CUTA,SNX3,CCL2,CAPZB,COL6A1,GLIPR1,SQSTM1,EEF2,SPARC,LDHB,CEBPB
GO:MF	actin filament binding	GO:0051015	0.00723962	2.14028	210	48	6	TAGLN,TPM2,TPM1,BIN1,CAPZB,EEF2
GO:MF	growth factor binding	GO:0019838	0.0122037	1.91351	137	48	5	COL1A2,CYR61,HTRA1,COL1A1,COL6A1
GO:MF	collagen binding	GO:0005518	0.0136721	1.86416	69	48	4	COL6A2,CRTAP,COL6A1,SPARC
GO:BP	extracellular matrix organization	GO:0030198	1.01556e-05	4.9933	399	47	11	COL1A2,MMP2,EFEMP2,COL6A2,CYR61,HTRA1,COL1A1,CREB3L1,CRTAP,COL6A1,SPARC
GO:BP	extracellular structure organization	GO:0043062	1.04234e-05	4.98199	400	47	11	COL1A2,MMP2,EFEMP2,COL6A2,CYR61,HTRA1,COL1A1,CREB3L1,CRTAP,COL6A1,SPARC
GO:BP	cellular response to organic substance	GO:0071310	0.000962193	3.01674	2812	47	22	RARRES2,B2M,SPON2,COL1A2,ACTB,HLA-B,MMP2,UBB,CYR61,FBXO32,HTRA1,COL1A1,RAP1B,GSTO1,CREB3L1,SOD2,CCL2,COL6A1,SQSTM1,EEF2,SPARC,CEBPB
GO:BP	vesicle-mediated transport	GO:0016192	0.00194293	2.71154	2193	47	19	RARRES2,B2M,SPON2,FTL,ACTB,HLA-B,UBB,PDLIM7,CD151,RAP1B,BIN1,PGRMC1,SNX3,CCL2,CAPZB,GLIPR1,SQSTM1,EEF2,SPARC
GO:BP	cellular response to amino acid stimulus	GO:0071230	0.00247427	2.60655	71	47	5	COL1A2,MMP2,COL1A1,COL6A1,CEBPB
GO:BP	ossification	GO:0001503	0.00297834	2.52603	428	47	9	COL1A2,MMP2,CYR61,COL1A1,PDLIM7,CREB3L1,COL6A1,SPARC,CEBPB
GO:BP	cellular response to endogenous stimulus	GO:0071495	0.00428263	2.36829	1434	47	15	RARRES2,COL1A2,ACTB,MMP2,UBB,CYR61,FBXO32,HTRA1,COL1A1,RAP1B,CREB3L1,CCL2,COL6A1,EEF2,CEBPB
GO:BP	cellular response to acid chemical	GO:0071229	0.0044896	2.34779	80	47	5	COL1A2,MMP2,COL1A1,COL6A1,CEBPB
GO:BP	response to endogenous stimulus	GO:0009719	0.0068718	2.16293	1698	47	16	RARRES2,COL1A2,ACTB,MMP2,UBB,CYR61,FBXO32,HTRA1,COL1A1,RAP1B,CREB3L1,CCL2,COL6A1,EEF2,SPARC,CEBPB
GO:BP	cellular response to chemical stimulus	GO:0070887	0.00755683	2.12166	3438	47	23	RARRES2,B2M,SPON2,COL1A2,TPM1,ACTB,HLA-B,MMP2,UBB,CYR61,FBXO32,HTRA1,COL1A1,RAP1B,GSTO1,CREB3L1,SOD2,CCL2,COL6A1,SQSTM1,EEF2,SPARC,CEBPB
GO:BP	response to organic substance	GO:0010033	0.00842076	2.07465	3459	47	23	RARRES2,B2M,SPON2,COL1A2,ACTB,HLA-B,MMP2,COL6A2,UBB,CYR61,FBXO32,HTRA1,COL1A1,RAP1B,GSTO1,CREB3L1,SOD2,CCL2,COL6A1,SQSTM1,EEF2,SPARC,CEBPB
GO:BP	response to oxygen-containing compound	GO:1901700	0.0121576	1.91515	1774	47	16	RARRES2,SPON2,COL1A2,TPM1,ACTB,MMP2,COL6A2,FBXO32,COL1A1,RAP1B,SOD2,CCL2,COL6A1,EEF2,SPARC,CEBPB
GO:BP	biological process involved in interspecies interaction between organisms	GO:0044419	0.0157188	1.80358	2272	47	18	RARRES2,ACTA2,B2M,SPON2,HLA-B,RPL9,UBB,RPL21,RPL5,HTRA1,CD151,BIN1,CREB3L1,SOD2,SNX3,CCL2,SPARC,CEBPB
GO:BP	response to wounding	GO:0009611	0.0180437	1.74367	682	47	10	MYL9,COL1A2,TPM1,ACTB,CYR61,COL1A1,CD151,SOD2,CAPZB,SPARC
GO:BP	response to chemical	GO:0042221	0.0192572	1.71541	4834	47	27	RARRES2,NUPR1,B2M,SPON2,COL1A2,TPM1,ACTB,HLA-B,MMP2,COL6A2,UBB,CYR61,FBXO32,HTRA1,COL1A1,PDLIM7,RAP1B,GSTO1,CREB3L1,SOD2,CUTA,CCL2,COL6A1,SQSTM1,EEF2,SPARC,CEBPB
GO:BP	wound healing	GO:0042060	0.0239679	1.62037	553	47	9	MYL9,COL1A2,TPM1,ACTB,CYR61,COL1A1,CD151,CAPZB,SPARC
GO:BP	response to cytokine	GO:0034097	0.025008	1.60192	1242	47	13	B2M,COL1A2,HLA-B,MMP2,UBB,COL1A1,RAP1B,GSTO1,SOD2,CCL2,SQSTM1,SPARC,CEBPB
GO:BP	cellular response to oxygen-containing compound	GO:1901701	0.0270302	1.56815	1251	47	13	RARRES2,SPON2,COL1A2,TPM1,ACTB,MMP2,FBXO32,COL1A1,RAP1B,SOD2,CCL2,COL6A1,CEBPB
GO:BP	response to amino acid	GO:0043200	0.0329403	1.48227	120	47	5	COL1A2,MMP2,COL1A1,COL6A1,CEBPB
GO:BP	cell activation	GO:0001775	0.0418656	1.37814	1510	47	14	MYL9,B2M,FTL,COL1A2,ACTB,HLA-B,COL1A1,CD151,RAP1B,PGRMC1,CCL2,GLIPR1,EEF2,CEBPB
GO:BP	viral process	GO:0016032	0.0496008	1.30451	940	47	11	B2M,HLA-B,RPL9,UBB,RPL21,RPL5,CD151,BIN1,CREB3L1,SNX3,CCL2
GO:CC	extracellular space	GO:0005615	6.73669e-08	7.17155	3598	48	29	RARRES2,ACTA2,B2M,SPON2,FTL,COL1A2,ACTB,HLA-B,MMP2,EFEMP2,COL6A2,UBB,RPL5,HTRA1,COL1A1,RAP1B,GSTO1,CRTAP,SOD2,CUTA,SNX3,CCL2,CAPZB,COL6A1,GLIPR1,SQSTM1,EEF2,SPARC,LDHB
GO:CC	contractile fiber	GO:0043292	1.01196e-07	6.99484	242	48	10	ACTA2,MYL9,TPM2,TPM1,MMP2,FBXO32,PDLIM7,BIN1,CAPZB,SQSTM1
GO:CC	sarcomere	GO:0030017	5.80777e-07	6.23599	209	48	9	MYL9,TPM2,TPM1,MMP2,FBXO32,PDLIM7,BIN1,CAPZB,SQSTM1
GO:CC	extracellular exosome	GO:0070062	6.68422e-07	6.17495	2180	48	22	ACTA2,B2M,SPON2,FTL,COL1A2,ACTB,HLA-B,EFEMP2,COL6A2,UBB,RPL5,HTRA1,RAP1B,GSTO1,SOD2,CUTA,SNX3,CAPZB,COL6A1,SQSTM1,EEF2,LDHB
GO:CC	extracellular region	GO:0005576	9.21185e-07	6.03565	4602	48	31	RARRES2,ACTA2,B2M,SPON2,FTL,COL1A2,ACTB,HLA-B,MMP2,EFEMP2,COL6A2,UBB,CYR61,RPL5,HTRA1,COL1A1,CD151,RAP1B,GSTO1,CRTAP,SOD2,CUTA,SNX3,CCL2,CAPZB,COL6A1,GLIPR1,SQSTM1,EEF2,SPARC,LDHB
GO:CC	extracellular vesicle	GO:1903561	1.38576e-06	5.85831	2266	48	22	ACTA2,B2M,SPON2,FTL,COL1A2,ACTB,HLA-B,EFEMP2,COL6A2,UBB,RPL5,HTRA1,RAP1B,GSTO1,SOD2,CUTA,SNX3,CAPZB,COL6A1,SQSTM1,EEF2,LDHB
GO:CC	myofibril	GO:0030016	1.3954e-06	5.8553	231	48	9	MYL9,TPM2,TPM1,MMP2,FBXO32,PDLIM7,BIN1,CAPZB,SQSTM1
GO:CC	extracellular organelle	GO:0043230	1.40889e-06	5.85112	2268	48	22	ACTA2,B2M,SPON2,FTL,COL1A2,ACTB,HLA-B,EFEMP2,COL6A2,UBB,RPL5,HTRA1,RAP1B,GSTO1,SOD2,CUTA,SNX3,CAPZB,COL6A1,SQSTM1,EEF2,LDHB
GO:CC	collagen-containing extracellular matrix	GO:0062023	1.63921e-06	5.78537	424	48	11	RARRES2,COL1A2,MMP2,EFEMP2,COL6A2,CYR61,HTRA1,COL1A1,CD151,COL6A1,SPARC
GO:CC	extracellular matrix	GO:0031012	2.78239e-06	5.55558	564	48	12	RARRES2,SPON2,COL1A2,MMP2,EFEMP2,COL6A2,CYR61,HTRA1,COL1A1,CD151,COL6A1,SPARC
GO:CC	vesicle	GO:0031982	7.56555e-06	5.12116	4071	48	28	RARRES2,ACTA2,B2M,SPON2,FTL,COL1A2,ACTB,HLA-B,EFEMP2,COL6A2,UBB,RPL5,HTRA1,COL1A1,RAP1B,GSTO1,BIN1,PGRMC1,SOD2,CUTA,SNX3,CAPZB,COL6A1,GLIPR1,SQSTM1,EEF2,SPARC,LDHB
GO:CC	supramolecular fiber	GO:0099512	2.81932e-05	4.54986	1006	48	14	ACTA2,MYL9,TPM2,COL1A2,TPM1,ACTB,MMP2,FBXO32,COL1A1,PDLIM7,BIN1,CAPZB,COL6A1,SQSTM1
GO:CC	supramolecular polymer	GO:0099081	3.10847e-05	4.50745	1014	48	14	ACTA2,MYL9,TPM2,COL1A2,TPM1,ACTB,MMP2,FBXO32,COL1A1,PDLIM7,BIN1,CAPZB,COL6A1,SQSTM1
GO:CC	supramolecular complex	GO:0099080	0.000864174	3.0634	1337	48	14	ACTA2,MYL9,TPM2,COL1A2,TPM1,ACTB,MMP2,FBXO32,COL1A1,PDLIM7,BIN1,CAPZB,COL6A1,SQSTM1
GO:CC	collagen type I trimer	GO:0005584	0.00156071	2.80668	2	48	2	COL1A2,COL1A1
GO:CC	endoplasmic reticulum lumen	GO:0005788	0.00282244	2.54938	307	48	7	B2M,COL1A2,COL6A2,CYR61,COL1A1,CRTAP,COL6A1
GO:CC	cytoplasm	GO:0005737	0.0070375	2.15258	11888	48	43	RARRES2,ACTA2,NUPR1,TAGLN,MYL9,B2M,TPM2,FTL,COL1A2,TPM1,ACTB,HLA-B,MMP2,CISD1,RPL9,COL6A2,UBB,CYR61,RPL21,FBXO32,RPL5,HTRA1,COL1A1,PDLIM7,CD151,RAP1B,GSTO1,BIN1,CREB3L1,CRTAP,PGRMC1,MRFAP1,SOD2,SAP18,SNX3,CAPZB,COL6A1,GLIPR1,SQSTM1,EEF2,SPARC,LDHB,CEBPB
GO:CC	muscle thin filament tropomyosin	GO:0005862	0.00933399	2.02993	4	48	2	TPM2,TPM1
GO:CC	actin cytoskeleton	GO:0015629	0.00983813	2.00709	513	48	8	ACTA2,MYL9,TPM2,TPM1,ACTB,PDLIM7,BIN1,CAPZB
GO:CC	secretory vesicle	GO:0099503	0.0099382	2.00269	1028	48	11	RARRES2,B2M,FTL,HLA-B,COL1A1,RAP1B,BIN1,PGRMC1,GLIPR1,EEF2,SPARC
GO:CC	secretory granule	GO:0030141	0.0112597	1.94847	855	48	10	RARRES2,B2M,FTL,HLA-B,COL1A1,RAP1B,PGRMC1,GLIPR1,EEF2,SPARC
GO:CC	collagen trimer	GO:0005581	0.0241643	1.61682	95	48	4	COL1A2,COL6A2,COL1A1,COL6A1
GO:CC	MHC class I protein complex	GO:0042612	0.0432777	1.36374	8	48	2	B2M,HLA-B
KEGG	Focal adhesion	KEGG:04510	0.000801232	3.09624	200	32	7	MYL9,COL1A2,ACTB,COL6A2,COL1A1,RAP1B,COL6A1
KEGG	Relaxin signaling pathway	KEGG:04926	0.0101388	1.99401	128	32	5	ACTA2,COL1A2,MMP2,COL1A1,CREB3L1
KEGG	Fluid shear stress and atherosclerosis	KEGG:05418	0.0139558	1.85524	137	32	5	ACTB,MMP2,GSTO1,CCL2,SQSTM1
KEGG	ECM-receptor interaction	KEGG:04512	0.0284929	1.54526	88	32	4	COL1A2,COL6A2,COL1A1,COL6A1
KEGG	AGE-RAGE signaling pathway in diabetic complications	KEGG:04933	0.0463266	1.33417	100	32	4	COL1A2,MMP2,COL1A1,CCL2

## Sheet: 2I
Table S2I. Overrepresented transcription factor binding sites in LAMp and LAMcore signatures.
LAMp
TF	JASPAR ID	Class	Family	Target gene hits	Target gene non-hits	Background gene hits	Background gene non-hits	Target TFBS hits	Target TFBS nucleotide rate	Background TFBS hits	Background TFBS nucleotide rate	Z-score	Fisher score
CEBPA	MA0102.2	Zipper-Type	Leucine Zipper	312	403	7140	17612	1094	0.0152	16948	0.013	15.083	36.922
ELF5	MA0136.1	Winged Helix-Turn-Helix	Ets	453	262	11141	13611	2300	0.0319	39516	0.0304	6.928	49.987
FOXA1	MA0148.1	Winged Helix-Turn-Helix	Forkhead	335	380	7374	17378	1226	0.0208	18926	0.0178	18.112	47.34
IRF1	MA0050.1	Winged Helix-Turn-Helix	IRF	139	576	2630	22122	228	0.00421	3656	0.00375	6.096	25.934
NFATC2	MA0152.1	Ig-fold	Rel	408	307	9360	15392	1940	0.0209	30805	0.0184	14.854	55.466
RUNX1	MA0002.2	Ig-fold	Runt	379	336	8060	16692	1166	0.0197	19106	0.018	10.835	64.339
Sox5	MA0087.1	Other Alpha-Helix	High Mobility Group	313	402	7125	17627	1392	0.015	20823	0.0125	18.489	37.867
SOX9	MA0077.1	Other Alpha-Helix	High Mobility Group	284	431	6151	18601	813	0.0113	12855	0.00988	11.218	39.762
SPIB	MA0081.1	Winged Helix-Turn-Helix	Ets	491	224	12386	12366	3470	0.0374	59541	0.0356	7.73	52.291
STAT1	MA0137.2	Ig-fold	Stat	160	555	2836	21916	227	0.00524	3645	0.00467	6.725	35.601
TBP	MA0108.2	Beta-sheet	TATA-binding	281	434	5467	19285	744	0.0172	10409	0.0133	26.957	54.752
LAMcore
TF	JASPAR ID	Class	Family	Target gene hits	Target gene non-hits	Background gene hits	Background gene non-hits	Target TFBS hits	Target TFBS nucleotide rate	Background TFBS hits	Background TFBS nucleotide rate	Z-score	Fisher score
CEBPA	MA0102.2	Zipper-Type	Leucine Zipper	39	23	8891	15861	171	0.0176	27238	0.014	8.996	11.137
ELF5	MA0136.1	Winged Helix-Turn-Helix	Ets	52	10	12880	11872	332	0.0342	60342	0.0311	5.302	15.66
FOXA1	MA0148.1	Winged Helix-Turn-Helix	Forkhead	40	22	9175	15577	173	0.0218	30816	0.0194	5.091	11.418
IRF1	MA0050.1	Winged Helix-Turn-Helix	IRF	21	41	3745	21007	41	0.00563	5886	0.00404	7.375	8.52
NFATC2	MA0152.1	Ig-fold	Rel	46	16	11132	13620	300	0.024	48503	0.0194	9.848	12.731
RUNX1	MA0002.2	Ig-fold	Runt	49	13	9845	14907	189	0.0238	29582	0.0186	11.297	21.783
SOX5	MA0087.1	Other Alpha-Helix	High Mobility Group	39	23	8921	15831	195	0.0156	34036	0.0136	5.052	11.048
SOX9	MA0077.1	Other Alpha-Helix	High Mobility Group	29	33	7790	16962	120	0.0124	20511	0.0106	5.177	4.779
SPIB	MA0081.1	Winged Helix-Turn-Helix	Ets	54	8	14010	10742	511	0.0409	91032	0.0365	7.043	15.236
STAT1	MA0137.2	Ig-fold	Stat	23	39	3914	20838	36	0.00618	5652	0.00485	5.627	10.123
TBP	MA0108.2	Beta-sheet	TATA-binding	33	29	6964	17788	106	0.0182	16649	0.0143	9.713	10.457

## Sheet: 2J
Table S2J. Overrepresented GO terms and KEGG pathways (FDR < 5%) in 10% of the most variably expressed genes among bulk LAM lung samples.
GO/KEGG	Term/pathway	ID	P value adjusted	-log10 P value adjusted	Term size (n genes)	Query size (n genes)	Intersection size (n genes)	Genes in set
GO:MF	signaling receptor activator activity	GO:0030546	2.08949e-11	10.68	494	1073	75	NRTN,FGF8,PTH,CRLF1,IL18,CCL27,PPBP,IL26,CXCL13,FGF20,INSL6,CCL2,NTS,NPPC,CCL15,CCL19,WNT4,IFNA8,EPHA7,FGF22,REG1A,SEMA3E,IFNA2,CCL20,CCL17,TNFRSF11B,VIP,GNRH2,CSF3,RETN,CGA,BMP3,GCG,IL5,CXCL3,IL24,TNF,IL9,XCL2,NGF,ANGPT4,AMH,NTF3,FLT3LG,IL25,EDN3,CCL4,CCL24,UCN,SST,F2,INHA,SCT,IFNA6,IFNB1,PYY,LIF,ZP3,IFNW1,GREM2,CLCF1,CXCL5,PF4V1,LEP,TNFSF14,CCL23,CD40LG,NRG2,SEMA6B,CCL22,IL7,APOA1,CALCB,IL2,EREG
GO:MF	receptor ligand activity	GO:0048018	3.31555e-11	10.4794	488	1073	74	NRTN,FGF8,PTH,CRLF1,IL18,CCL27,PPBP,IL26,CXCL13,FGF20,INSL6,CCL2,NTS,NPPC,CCL15,CCL19,WNT4,IFNA8,EPHA7,FGF22,REG1A,SEMA3E,IFNA2,CCL20,CCL17,TNFRSF11B,VIP,GNRH2,CSF3,RETN,CGA,BMP3,GCG,IL5,CXCL3,IL24,TNF,IL9,XCL2,NGF,AMH,NTF3,FLT3LG,IL25,EDN3,CCL4,CCL24,UCN,SST,F2,INHA,SCT,IFNA6,IFNB1,PYY,LIF,ZP3,IFNW1,GREM2,CLCF1,CXCL5,PF4V1,LEP,TNFSF14,CCL23,CD40LG,NRG2,SEMA6B,CCL22,IL7,APOA1,CALCB,IL2,EREG
GO:MF	receptor regulator activity	GO:0030545	6.33198e-11	10.1985	536	1073	78	NRTN,FGF8,PTH,CRLF1,IL18,CCL27,PPBP,IL26,CXCL13,FGF20,INSL6,CCL2,NTS,NPPC,CCL15,CCL19,WNT4,IFNA8,EPHA7,FGF22,REG1A,SEMA3E,IFNA2,CCL20,CCL17,TNFRSF11B,VIP,DKKL1,GNRH2,CSF3,RETN,CGA,BMP3,GCG,IL5,CXCL3,IL24,TNF,IL9,XCL2,NGF,ANGPT4,AMH,NTF3,FLT3LG,IL25,EDN3,CCL4,CCL24,UCN,SST,F2,INHA,SCT,IFNA6,IFNB1,PYY,LIF,ZP3,IFNW1,GREM2,DKK4,CLCF1,CXCL5,PF4V1,LEP,TNFSF14,IGSF1,CCL23,CD40LG,NRG2,SEMA6B,CCL22,IL7,AP…
GO:MF	cytokine activity	GO:0005125	2.15226e-08	7.6671	219	1073	41	CRLF1,IL18,CCL27,PPBP,IL26,CXCL13,CCL2,CCL15,CCL19,IFNA8,IFNA2,CCL20,CCL17,TNFRSF11B,CSF3,BMP3,IL5,CXCL3,IL24,TNF,IL9,XCL2,FLT3LG,IL25,CCL4,CCL24,INHA,IFNA6,IFNB1,LIF,IFNW1,GREM2,CLCF1,CXCL5,PF4V1,TNFSF14,CCL23,CD40LG,CCL22,IL7,IL2
GO:MF	cytokine receptor binding	GO:0005126	2.28433e-06	5.64124	264	1073	42	CRLF1,IL18,CCL27,PPBP,CXCL13,CCL2,CCL15,CCL19,IFNA8,IFNA2,CCL20,CCL17,CSF3,NTRK1,IL5,CXCL3,TNF,IL9,XCL2,TIMM50,NGF,AMH,NTF3,IL25,CCL4,CCL24,SYK,IFNA6,IFNB1,LIF,IFNW1,CLCF1,CXCL5,PF4V1,TNFSF14,CCRL2,CCL23,CD40LG,CCL22,IL7,IL2,TRAF2
GO:MF	chemokine activity	GO:0008009	5.69994e-06	5.24413	49	1073	16	CCL27,PPBP,CXCL13,CCL2,CCL15,CCL19,CCL20,CCL17,CXCL3,XCL2,CCL4,CCL24,CXCL5,PF4V1,CCL23,CCL22
GO:MF	signaling receptor binding	GO:0005102	1.09698e-05	4.9598	1643	1073	151	NRTN,RAPSN,FGF8,PTH,SNTG2,SLC9A3R2,CRLF1,HHLA2,IL18,NMU,COMP,ADAM2,CCL27,PPBP,APOC3,IL26,CXCL13,FGF20,FZD8,INSL6,CCL2,NTS,NPPC,APOF,CCL15,CACNG2,CCDC88C,TRDN,RIT2,DMP1,CYTL1,CCL19,WNT4,ITGB7,S100B,CD72,VTN,IFNA8,AGR2,ADRB1,KCNA5,PRTN3,MARCO,EPHA7,NTN3,MUC4,FGF22,NLGN4Y,REG1A,SEMA3E,CNTN6,LCN1,IFNA2,CCL20,PPARG,IHH,CCL17,TNFRSF11B,CDH17,ASXL3,MBL2,VIP,DKKL1,GNRH2,CSF3,IGFBP1,RETN,CGA,LRRTM2,NTRK1,…
GO:MF	DNA-binding transcription factor activity, RNA polymerase II-specific	GO:0000981	3.06006e-05	4.51427	1021	1073	103	ASCL2,POU1F1,THAP9,SOX18,GBX2,PTH,POU3F3,EHF,NFE2,MYF5,NEUROG2,PGR,MLLT1,SIM1,E2F8,POU2F3,HIC1,NEUROG3,POU6F2,BARX1,HOXC8,SEBOX,NKX2-2,ZNF750,NANOG,SOX14,FOSL1,PURG,ZNF711,PITX1,FOXD1,NEUROG1,SRY,PPARG,INSM1,NPAS1,TLX2,LYL1,NKX2-8,RFX4,SP1,DMRT1,ZNF639,HOXD10,SOX5,MXD1,ONECUT1,CDX4,FEZF2,FOXD4,FOXD4L1,RFX1,POU4F3,VSX1,GATA4,ERF,VAX2,TP73,HOXA2,HOXB3,GABPA,SCRT1,DLX6,BATF,FOXD3,LHX1,SIX5,CUX2,TCF1…
GO:MF	chemokine receptor binding	GO:0042379	0.000252613	3.59754	70	1073	17	CCL27,PPBP,CXCL13,CCL2,CCL15,CCL19,CCL20,CCL17,CXCL3,XCL2,CCL4,CCL24,CXCL5,PF4V1,CCRL2,CCL23,CCL22
GO:MF	DNA-binding transcription activator activity	GO:0001216	0.000654209	3.18428	437	1073	52	POU1F1,SOX18,GBX2,POU3F3,EHF,MYF5,PGR,POU2F3,NEUROG3,POU6F2,BARX1,ZNF750,FOSL1,PITX1,FOXD1,TLX2,NKX2-8,RFX4,SP1,DMRT1,ZNF639,HOXD10,ONECUT1,CDX4,FEZF2,POU4F3,GATA4,TP73,HOXB3,GABPA,BATF,SIX5,TCF15,NR1H2,GATA1,NKX2-5,SOX1,HNF4G,E2F2,FOSB,HOXD13,HAND2,E2F5,FOXH1,PROP1,MEOX2,KLF13,CRX,SPI1,ETV2,HOXC13,ETS1
GO:MF	CCR chemokine receptor binding	GO:0048020	0.00116234	2.93467	47	1073	13	CCL27,CXCL13,CCL2,CCL15,CCL19,CCL20,CCL17,XCL2,CCL4,CCL24,CCRL2,CCL23,CCL22
GO:MF	DNA-binding transcription activator activity, RNA polymerase II-specific	GO:0001228	0.00119671	2.92201	434	1073	51	POU1F1,SOX18,GBX2,POU3F3,EHF,MYF5,PGR,POU2F3,NEUROG3,POU6F2,BARX1,ZNF750,FOSL1,PITX1,FOXD1,TLX2,NKX2-8,RFX4,SP1,DMRT1,ZNF639,HOXD10,ONECUT1,CDX4,FEZF2,POU4F3,GATA4,TP73,HOXB3,GABPA,BATF,SIX5,TCF15,NR1H2,GATA1,NKX2-5,SOX1,HNF4G,E2F2,FOSB,HOXD13,HAND2,FOXH1,PROP1,MEOX2,KLF13,CRX,SPI1,ETV2,HOXC13,ETS1
GO:MF	cis-regulatory region sequence-specific DNA binding	GO:0000987	0.00275309	2.56018	633	1073	66	ASCL2,POU1F1,SOX18,EHF,NFE2,MYF5,NEUROG2,PGR,E2F8,POU2F3,NEUROG3,TOX3,NKX2-2,PRMT5,ZNF750,NANOG,FOSL1,PITX1,FOXD1,NEUROG1,PPARG,INSM1,NKX2-8,RFX4,SP1,DMRT1,ZNF639,MXD1,ONECUT1,CDX4,POU2AF1,FEZF2,RFX1,POU4F3,GATA4,VAX2,TP73,HOXA2,HOXB3,GABPA,DLX6,BATF,LHX1,SIX5,CUX2,TCF15,NR1H2,GATA1,NKX2-5,SOX1,HNF4G,E2F2,FOSB,HOXD13,HAND2,PROP1,MEOX2,KLF13,HOXA3,NR5A1,CRX,SPI1,ETV2,GLI1,THRAP3,ETS1
GO:MF	sequence-specific DNA binding	GO:0043565	0.00284721	2.54558	1221	1073	110	ASCL2,POU1F1,SUV39H2,THAP9,SOX18,GBX2,POU3F3,EHF,NFE2,MYF5,NEUROG2,PGR,E2F8,POU2F3,CRIP1,HIC1,NEUROG3,RAG2,TOX3,BARX1,HOXC8,NKX2-2,PRMT5,ZNF750,NANOG,SOX14,FOSL1,PURG,ZNF711,PITX1,FOXD1,NEUROG1,ZNF442,PPARG,INSM1,TLX2,LYL1,NKX2-8,RFX4,SP1,DMRT1,ZNF639,HOXD10,SOX5,MXD1,ONECUT1,CDX4,CDC45,POU2AF1,NABP2,PRDM16,FEZF2,FOXD4,FOXD4L1,RFX1,POU4F3,VSX1,GATA4,ERF,VAX2,TP73,HOXA2,HOXB3,GABPA,SCRT1,DLX6,BATF…
GO:MF	DNA-binding transcription factor activity	GO:0003700	0.00653636	2.18466	1300	1073	114	ASCL2,POU1F1,TAF13,THAP9,ZNF165,SOX18,GBX2,PTH,POU3F3,EHF,NFE2,MYF5,NEUROG2,PGR,MLLT1,SIM1,E2F8,POU2F3,HIC1,NEUROG3,POU6F2,BARX1,HOXC8,RFXAP,SEBOX,NKX2-2,ZNF154,ZNF750,NANOG,SOX14,FOSL1,PURG,ZNF711,PITX1,FOXD1,NEUROG1,SRY,PPARG,INSM1,ZNF157,NPAS1,TLX2,LYL1,NKX2-8,RFX4,SP1,DMRT1,ZNF639,HOXD10,SOX5,MXD1,ONECUT1,CDX4,FEZF2,FOXD4,FOXD4L1,RFX1,POU4F3,VSX1,GATA4,ERF,VAX2,TP73,HOXA2,HOXB3,GABPA,SCRT1,DL…
GO:MF	RNA polymerase II cis-regulatory region sequence-specific DNA binding	GO:0000978	0.0100354	1.99846	607	1073	62	ASCL2,POU1F1,SOX18,EHF,MYF5,NEUROG2,PGR,E2F8,POU2F3,NEUROG3,TOX3,NKX2-2,PRMT5,ZNF750,NANOG,FOSL1,PITX1,FOXD1,NEUROG1,PPARG,INSM1,NKX2-8,RFX4,SP1,ZNF639,MXD1,ONECUT1,CDX4,POU2AF1,FEZF2,RFX1,POU4F3,GATA4,VAX2,TP73,HOXA2,HOXB3,GABPA,DLX6,BATF,SIX5,CUX2,TCF15,NR1H2,GATA1,NKX2-5,SOX1,HNF4G,FOSB,HOXD13,HAND2,PROP1,MEOX2,KLF13,HOXA3,NR5A1,CRX,SPI1,ETV2,GLI1,THRAP3,ETS1
GO:MF	RNA polymerase II transcription regulatory region sequence-specific DNA binding	GO:0000977	0.0324725	1.48848	832	1073	77	ASCL2,POU1F1,SOX18,GBX2,EHF,MYF5,NEUROG2,PGR,E2F8,POU2F3,NEUROG3,TOX3,BARX1,NKX2-2,PRMT5,ZNF750,NANOG,FOSL1,PURG,ZNF711,PITX1,FOXD1,NEUROG1,ZNF442,PPARG,INSM1,LYL1,NKX2-8,RFX4,SP1,DMRT1,ZNF639,HOXD10,MXD1,ONECUT1,CDX4,POU2AF1,FEZF2,RFX1,POU4F3,GATA4,VAX2,TP73,HOXA2,HOXB3,GABPA,SCRT1,DLX6,BATF,FOXD3,LHX1,SIX5,CUX2,TCF15,NR1H2,GATA1,NKX2-5,SOX1,HNF4G,E2F2,FOSB,HOXD13,HAND2,PROP1,MEOX2,KLF13,HEY2,HO…
GO:MF	transcription regulatory region sequence-specific DNA binding	GO:0000976	0.0343562	1.46399	888	1073	81	ASCL2,POU1F1,SUV39H2,SOX18,GBX2,EHF,NFE2,MYF5,NEUROG2,PGR,E2F8,POU2F3,NEUROG3,TOX3,BARX1,NKX2-2,PRMT5,ZNF750,NANOG,FOSL1,PURG,ZNF711,PITX1,FOXD1,NEUROG1,ZNF442,PPARG,INSM1,LYL1,NKX2-8,RFX4,SP1,DMRT1,ZNF639,HOXD10,SOX5,MXD1,ONECUT1,CDX4,POU2AF1,FEZF2,RFX1,POU4F3,GATA4,VAX2,TP73,HOXA2,HOXB3,GABPA,SCRT1,DLX6,BATF,FOXD3,LHX1,SIX5,CUX2,TCF15,NR1H2,GATA1,NKX2-5,SOX1,HNF4G,E2F2,FOSB,HOXD13,HAND2,MTA2,PR…
GO:MF	sequence-specific double-stranded DNA binding	GO:1990837	0.035418	1.45078	930	1073	84	ASCL2,POU1F1,SUV39H2,SOX18,GBX2,EHF,NFE2,MYF5,NEUROG2,PGR,E2F8,POU2F3,CRIP1,NEUROG3,TOX3,BARX1,NKX2-2,PRMT5,ZNF750,NANOG,FOSL1,PURG,ZNF711,PITX1,FOXD1,NEUROG1,ZNF442,PPARG,INSM1,LYL1,NKX2-8,RFX4,SP1,DMRT1,ZNF639,HOXD10,SOX5,MXD1,ONECUT1,CDX4,CDC45,POU2AF1,FEZF2,RFX1,POU4F3,GATA4,VAX2,TP73,HOXA2,HOXB3,GABPA,SCRT1,DLX6,BATF,FOXD3,MCM10,LHX1,SIX5,CUX2,TCF15,NR1H2,GATA1,NKX2-5,SOX1,HNF4G,E2F2,FOSB,HO…
GO:MF	regulatory region nucleic acid binding	GO:0001067	0.0356899	1.44745	889	1073	81	ASCL2,POU1F1,SUV39H2,SOX18,GBX2,EHF,NFE2,MYF5,NEUROG2,PGR,E2F8,POU2F3,NEUROG3,TOX3,BARX1,NKX2-2,PRMT5,ZNF750,NANOG,FOSL1,PURG,ZNF711,PITX1,FOXD1,NEUROG1,ZNF442,PPARG,INSM1,LYL1,NKX2-8,RFX4,SP1,DMRT1,ZNF639,HOXD10,SOX5,MXD1,ONECUT1,CDX4,POU2AF1,FEZF2,RFX1,POU4F3,GATA4,VAX2,TP73,HOXA2,HOXB3,GABPA,SCRT1,DLX6,BATF,FOXD3,LHX1,SIX5,CUX2,TCF15,NR1H2,GATA1,NKX2-5,SOX1,HNF4G,E2F2,FOSB,HOXD13,HAND2,MTA2,PR…
GO:MF	double-stranded DNA binding	GO:0003690	0.0485777	1.31356	1022	1073	90	ASCL2,POU1F1,SUV39H2,SOX18,GBX2,EHF,NFE2,MYF5,NEUROG2,PGR,E2F8,POU2F3,CRIP1,NEUROG3,TOX3,BARX1,NKX2-2,PRMT5,ZNF750,NANOG,FOSL1,PURG,ZNF711,PITX1,FOXD1,MSH5,NEUROG1,ZNF442,PPARG,INSM1,LYL1,NKX2-8,AFF3,RFX4,SP1,DMRT1,ZNF639,HOXD10,SOX5,MXD1,ONECUT1,CDX4,CDC45,POU2AF1,FEZF2,RFX1,POU4F3,GATA4,VAX2,TP73,HOXA2,HOXB3,GABPA,SCRT1,DLX6,BATF,FOXD3,MCM10,LHX1,SIX5,CUX2,TCF15,NR1H2,GATA1,ZBP1,NKX2-5,SOX1,HNF…
GO:BP	multicellular organismal process	GO:0032501	1.458e-18	17.8362	7904	1068	623	ASCL2,POU1F1,NRTN,ZNF165,PCDH8,KIF18A,SOX18,GBX2,PCK1,FGF8,SCGB1A1,TRIM58,BRDT,TRPM1,PTH,TNNC1,TPH1,SNTG2,GALR2,MYH1,USP53,LTF,IMPG1,ICOS,COL4A4,POU3F3,G6PC,STMN3,SGCG,GNGT1,CRLF1,RPE65,HHLA2,XAB2,KRT15,IL18,HTN3,SI,NMU,COMP,EHF,ATG16L1,NFE2,JPH3,ADAM2,TNFRSF17,MYF5,NEUROG2,CYP4F11,ERAP2,CDKN2B,TLL1,BRIP1,CDK5R2,PGR,TMOD2,CORO1A,SCN1A,EXTL1,SIM1,ABCG5,E2F8,APOC3,ZNF675,FZD2,IL26,UBASH3A,OR7C1,MAK…
GO:BP	developmental process	GO:0032502	4.62944e-16	15.3345	6644	1068	536	ASCL2,POU1F1,NRTN,SUV39H2,ZNF165,PCDH8,KIF18A,SOX18,GBX2,PCK1,FGF8,SCGB1A1,TRIM58,BRDT,TRPM1,PTH,TNNC1,TPH1,OLFM4,SNTG2,GALR2,LTF,ICOS,PLEKHO1,COL4A4,POU3F3,G6PC,STMN3,SGCG,GNGT1,CRLF1,RPE65,XAB2,KRT15,IL18,HTN3,COMP,EHF,ATG16L1,NFE2,TNFRSF17,MYF5,NEUROG2,CDKN2B,TLL1,BRIP1,CDK5R2,PGR,TMOD2,CORO1A,EXTL1,SIM1,E2F8,POU2F3,ZNF675,FZD2,OR7C1,MAK,CRIP1,CXCL13,FGF20,SPAG4,SLC4A10,FZD8,ARHGEF26,RCAN3,CXC…
GO:BP	anatomical structure development	GO:0048856	1.11332e-13	12.9534	6117	1068	493	ASCL2,POU1F1,NRTN,ZNF165,PCDH8,KIF18A,SOX18,GBX2,PCK1,FGF8,SCGB1A1,TRIM58,TRPM1,PTH,TNNC1,TPH1,OLFM4,SNTG2,GALR2,LTF,ICOS,PLEKHO1,COL4A4,POU3F3,STMN3,SGCG,GNGT1,CRLF1,RPE65,XAB2,KRT15,IL18,HTN3,COMP,EHF,ATG16L1,NFE2,TNFRSF17,MYF5,NEUROG2,CDKN2B,TLL1,BRIP1,CDK5R2,PGR,TMOD2,CORO1A,EXTL1,SIM1,E2F8,POU2F3,ZNF675,FZD2,MAK,CRIP1,CXCL13,FGF20,SLC4A10,FZD8,ARHGEF26,RCAN3,CXCR2,TIE1,CLDN1,SPANXB1,CCL2,NPP…
GO:BP	multicellular organism development	GO:0007275	9.56488e-13	12.0193	5616	1068	457	ASCL2,POU1F1,NRTN,ZNF165,PCDH8,KIF18A,SOX18,GBX2,PCK1,FGF8,SCGB1A1,TRIM58,TRPM1,PTH,TNNC1,TPH1,SNTG2,GALR2,LTF,ICOS,COL4A4,POU3F3,STMN3,SGCG,GNGT1,CRLF1,RPE65,XAB2,KRT15,IL18,HTN3,COMP,EHF,ATG16L1,NFE2,TNFRSF17,MYF5,NEUROG2,CDKN2B,TLL1,BRIP1,CDK5R2,PGR,TMOD2,EXTL1,SIM1,E2F8,ZNF675,FZD2,MAK,CRIP1,CXCL13,FGF20,SLC4A10,FZD8,CXCR2,TIE1,CLDN1,CCL2,NPPC,LIAS,KRTAP1-3,HSD3B1,CD1D,TWSG1,FSCN2,HIC1,TRPC5,…
GO:BP	system development	GO:0048731	3.16189e-12	11.5001	5034	1068	417	ASCL2,POU1F1,NRTN,ZNF165,KIF18A,SOX18,GBX2,PCK1,FGF8,TRIM58,TRPM1,PTH,TNNC1,TPH1,SNTG2,GALR2,LTF,ICOS,COL4A4,POU3F3,STMN3,SGCG,GNGT1,CRLF1,RPE65,XAB2,KRT15,IL18,HTN3,COMP,ATG16L1,NFE2,MYF5,NEUROG2,CDKN2B,TLL1,BRIP1,CDK5R2,PGR,TMOD2,EXTL1,SIM1,E2F8,ZNF675,FZD2,CRIP1,CXCL13,FGF20,SLC4A10,FZD8,CXCR2,TIE1,CLDN1,CCL2,NPPC,LIAS,KRTAP1-3,HSD3B1,CD1D,TWSG1,FSCN2,TRPC5,CRYBA4,MSLN,NEUROG3,RIT2,BRSK2,RAG2,…
GO:BP	animal organ development	GO:0048513	1.94343e-11	10.7114	3680	1068	323	ASCL2,POU1F1,NRTN,KIF18A,SOX18,GBX2,PCK1,FGF8,TRIM58,TRPM1,PTH,TNNC1,TPH1,LTF,COL4A4,POU3F3,SGCG,GNGT1,CRLF1,RPE65,XAB2,KRT15,IL18,HTN3,COMP,ATG16L1,NFE2,MYF5,CDKN2B,BRIP1,CDK5R2,PGR,SIM1,E2F8,ZNF675,FZD2,CRIP1,FGF20,SLC4A10,FZD8,CXCR2,CLDN1,CCL2,NPPC,KRTAP1-3,HSD3B1,CD1D,TWSG1,FSCN2,CRYBA4,MSLN,NEUROG3,RAG2,DMP1,SOSTDC1,SCEL,NRAP,PTPRS,CYTL1,CCL19,GFI1B,COL9A1,NOS3,BARX1,WNT4,HOXC8,S100B,VTN,NKX…
GO:BP	cell differentiation	GO:0030154	1.23271e-09	8.90914	4344	1068	360	ASCL2,POU1F1,NRTN,SUV39H2,SOX18,GBX2,PCK1,FGF8,TRIM58,BRDT,TRPM1,PTH,TPH1,OLFM4,GALR2,LTF,PLEKHO1,POU3F3,STMN3,GNGT1,RPE65,KRT15,IL18,COMP,EHF,NFE2,MYF5,NEUROG2,CDKN2B,TLL1,BRIP1,CDK5R2,PGR,TMOD2,SIM1,E2F8,POU2F3,ZNF675,FZD2,MAK,FGF20,SPAG4,SLC4A10,FZD8,ARHGEF26,TIE1,CLDN1,SPANXB1,CCL2,NPPC,KRTAP1-3,CD1D,TWSG1,CCDC88C,FSCN2,TRPC5,NEUROG3,RIT2,BRSK2,RAG2,CASS4,TRIM46,POU6F2,SOSTDC1,SCEL,NRAP,PTPRS…
GO:BP	cellular developmental process	GO:0048869	3.6242e-09	8.44079	4422	1068	363	ASCL2,POU1F1,NRTN,SUV39H2,SOX18,GBX2,PCK1,FGF8,TRIM58,BRDT,TRPM1,PTH,TPH1,OLFM4,GALR2,LTF,PLEKHO1,POU3F3,STMN3,GNGT1,RPE65,KRT15,IL18,COMP,EHF,NFE2,MYF5,NEUROG2,CDKN2B,TLL1,BRIP1,CDK5R2,PGR,TMOD2,SIM1,E2F8,POU2F3,ZNF675,FZD2,MAK,FGF20,SPAG4,SLC4A10,FZD8,ARHGEF26,TIE1,CLDN1,SPANXB1,CCL2,NPPC,KRTAP1-3,CD1D,TWSG1,CCDC88C,FSCN2,TRPC5,NEUROG3,RIT2,BRSK2,RAG2,CASS4,TRIM46,POU6F2,SOSTDC1,SCEL,NRAP,PTPRS…
GO:BP	digestion	GO:0007586	7.49387e-06	5.12529	139	1068	29	SI,NMU,ABCG5,MGAM,CHIT1,PNLIPRP2,MUC4,IREB2,NEUROG1,GUCA2B,CLPS,PRSS1,FABP1,APOA2,EPB41,UCN,VIL1,SST,NR1H2,APOA4,SCT,CEL,FABP2,GCNT3,LEP,APOA1,MUC13,SLC26A6,PGA5
GO:BP	tissue development	GO:0009888	9.28303e-06	5.03231	2124	1068	190	ASCL2,NRTN,PCDH8,SOX18,GBX2,PCK1,FGF8,PTH,TNNC1,LTF,POU3F3,SGCG,CRLF1,KRT15,HTN3,COMP,EHF,MYF5,PGR,SIM1,E2F8,POU2F3,FZD2,CRIP1,FGF20,ARHGEF26,CXCR2,TIE1,CLDN1,NPPC,LIAS,KRTAP1-3,TWSG1,CCDC88C,NEUROG3,BRSK2,DMP1,SOSTDC1,SCEL,NRAP,PTPRS,CYTL1,NOS3,BARX1,WNT4,S100B,VTN,NKX2-2,AGR2,EPYC,MYH6,ZNF750,NANOG,MMP20,KRTAP9-9,DSC1,EPHA7,ALPL,NTN3,KRT7,PITX1,MATN3,SEMA3E,FOXD1,MMP13,ACTA1,LTBP3,USH2A,ALOX12,…
GO:BP	response to external stimulus	GO:0009605	8.09223e-05	4.09193	2879	1068	238	NRTN,GBX2,PCK1,FGF8,SCGB1A1,PTH,USP53,LTF,G6PC,GNGT1,RPE65,IL18,HTN3,ATG16L1,CCL27,CDKN2B,PPBP,BRIP1,CRISP3,CORO1A,SCN1A,ABCG5,CXCL13,DGKB,ELOVL4,CXCR2,FKBP5,CLDN1,CCL2,LCN2,PKD2L2,LIAS,CCL15,CACNG2,CD1D,TRDN,RAG2,VAMP8,SCEL,PTPRS,CCL19,NOS3,WNT4,TIMP4,TNIP3,PDC,S100B,VTN,IFNA8,H2BFS,ADRB1,SOX14,FOSL1,KLRC2,CHIT1,KCNA5,PRTN3,MARCO,EPHA7,ALPL,NTN3,PNLIPRP2,MUC4,REG1A,SEMA3E,FOXD1,CNTN6,CPB2,ACTA1,…
GO:BP	anatomical structure morphogenesis	GO:0009653	0.000154435	3.81125	2827	1068	233	NRTN,PCDH8,SOX18,GBX2,FGF8,TRPM1,TNNC1,OLFM4,LTF,PLEKHO1,GNGT1,RPE65,IL18,COMP,MYF5,CDK5R2,PGR,TMOD2,CORO1A,E2F8,FZD2,CRIP1,CXCL13,SLC4A10,FZD8,ARHGEF26,RCAN3,CXCR2,TIE1,CCL2,NPPC,LIAS,TWSG1,CCDC88C,FSCN2,TRPC5,NEUROG3,BRSK2,CASS4,TRIM46,DMP1,SOSTDC1,NRAP,PTPRS,COL9A1,NOS3,WNT4,ITGB7,HOXC8,S100B,VTN,AGR2,MYH6,NANOG,TTLL1,SOX14,MMP20,CDH7,EPHA7,OPA3,ALPL,NTN3,PITX1,REG1A,MATN3,SEMA3E,FOXD1,CNTN6,M…
GO:BP	system process	GO:0003008	0.000301577	3.5206	2238	1068	191	TRPM1,TNNC1,GALR2,MYH1,USP53,IMPG1,POU3F3,SGCG,RPE65,NMU,COMP,NFE2,JPH3,ADAM2,ERAP2,TMOD2,SCN1A,ABCG5,FZD2,OR7C1,SLC4A10,CNGA3,CXCR2,CCL2,CST1,NPPC,ADCY8,CACNG2,FSCN2,CRYBA4,TRDN,PGAM2,IMPG2,SORCS3,POU6F2,OR1D5,NOS3,PDC,S100B,EPYC,ADRB1,MYH6,SOX14,FOSL1,KCNA5,OPA3,MUC4,NLGN4Y,FOXD1,OR2J3,IREB2,KCNN2,LCN1,ACTA1,NEUROG1,DRD1,USH2A,NPVF,ALOX12,NPHS2,PAK1,CHL1,TMOD3,PPARG,NPAS1,GUCA2B,P2RY2,ABCC2,VIP…
GO:BP	cell development	GO:0048468	0.00032935	3.48234	2212	1068	189	ASCL2,POU1F1,NRTN,SOX18,GBX2,FGF8,TRIM58,TRPM1,OLFM4,GALR2,LTF,STMN3,GNGT1,RPE65,COMP,MYF5,BRIP1,PGR,TMOD2,FZD2,FGF20,SLC4A10,ARHGEF26,CLDN1,SPANXB1,NPPC,CCDC88C,FSCN2,TRPC5,NEUROG3,RIT2,BRSK2,CASS4,TRIM46,NRAP,PTPRS,CCL19,WNT4,ITGB7,BRINP3,S100B,SEBOX,NKX2-2,PRMT5,PLP1,MYH6,TTLL1,SOX14,ASPM,EPHA7,NTN3,NTM,REG1A,MATN3,SEMA3E,FOXD1,CNTN6,ACTA1,NEUROG1,DRD1,NPHS2,PAK1,CHL1,TMOD3,PPARG,IHH,INSM1,TLX…
GO:BP	neutrophil chemotaxis	GO:0030593	0.000332081	3.47876	102	1068	22	PPBP,CXCL13,CXCR2,CCL2,CCL15,CCL19,CCL20,CCL17,BST1,CXCL3,XCL2,CAMK1D,EDN3,CCL4,CCL24,SYK,S100A8,CXCL5,PF4V1,CCL23,CCL22,S100A9
GO:BP	nervous system development	GO:0007399	0.000386251	3.41313	2448	1068	205	ASCL2,POU1F1,NRTN,ZNF165,GBX2,FGF8,TRPM1,SNTG2,GALR2,POU3F3,STMN3,GNGT1,RPE65,XAB2,ATG16L1,NEUROG2,CDK5R2,TMOD2,SIM1,FZD2,FGF20,SLC4A10,FZD8,CXCR2,CLDN1,CCL2,LIAS,HSD3B1,TWSG1,FSCN2,TRPC5,NEUROG3,RIT2,BRSK2,TRIM46,POU6F2,PTPRS,WNT4,TIMP4,BRINP3,HOXC8,S100B,VTN,NKX2-2,H2BFS,PRMT5,PLP1,TTLL1,SOX14,ASPM,EPHA7,NTN3,PITX1,NLGN4Y,NTM,REG1A,SEMA3E,FOXD1,CA10,CNTN6,NEUROG1,SYNGR3,DRD1,USH2A,PAK1,CHL1,PPA…
GO:BP	intestinal absorption	GO:0050892	0.000438982	3.35755	38	1068	13	ABCG5,IREB2,FABP1,APOA2,EPB41,VIL1,APOA4,CEL,FABP2,GCNT3,LEP,APOA1,SLC26A6
GO:BP	chemokine-mediated signaling pathway	GO:0070098	0.000501969	3.29932	88	1068	20	PPBP,CXCL13,CXCR2,CCL2,CCL15,CCL19,CCL20,CCL17,CXCL3,XCL2,CCR3,CCL4,CCL24,CXCL5,PF4V1,CCRL2,CCL23,CCR5,CCL22,ACKR4
GO:BP	cellular response to chemokine	GO:1990869	0.000600411	3.22155	97	1068	21	PPBP,CXCL13,CXCR2,CCL2,CCL15,CCL19,REG1A,CCL20,CCL17,CXCL3,XCL2,CCR3,CCL4,CCL24,CXCL5,PF4V1,CCRL2,CCL23,CCR5,CCL22,ACKR4
GO:BP	response to chemokine	GO:1990868	0.000600411	3.22155	97	1068	21	PPBP,CXCL13,CXCR2,CCL2,CCL15,CCL19,REG1A,CCL20,CCL17,CXCL3,XCL2,CCR3,CCL4,CCL24,CXCL5,PF4V1,CCRL2,CCL23,CCR5,CCL22,ACKR4
GO:BP	humoral immune response	GO:0006959	0.000613556	3.21215	365	1068	48	LTF,HTN3,PPBP,IGLV3-25,CXCL13,CCL2,LCN2,VTN,IFNA8,H2BFS,PRTN3,REG1A,CPB2,IFNA2,MBL2,SEMG2,KLK7,POU2AF1,SEMG1,IGKV2-28,IGKV2D-28,PLA2G2A,BST1,CXCL3,TNF,IGHV3-73,ELANE,EXO1,IGKV1-17,IGKV4-1,HIST1H2BJ,SFTPD,IGHA2,CR2,F2,IFNA6,IFNB1,ZP3,IFNW1,CHGA,S100A8,CFHR4,CXCL5,C8G,PF4V1,BPI,IL7,S100A9
GO:BP	response to stimulus	GO:0050896	0.000647164	3.18899	9358	1068	638	ASCL2,POU1F1,NRTN,TAF13,SUV39H2,RERGL,GRIA2,MMP1,KIF18A,GBX2,PCK1,FGF8,SCGB1A1,TRPM1,C8ORF44-SGK3,PTH,TNNC1,TPH1,PPP1R1A,OLFM4,GALR2,USP53,LTF,ICOS,HPR,COL4A4,SCGB2A1,G6PC,STMN3,GNGT1,CRLF1,RPE65,HHLA2,XAB2,IL18,GPR25,MZB1,HTN3,NMU,COMP,ATG16L1,MILR1,NFE2,GRAMD1C,TRAV13-1,JPH3,ADAM2,TNFRSF17,CCL27,CYP4F11,ERAP2,CDKN2B,P2RY13,VPREB1,PPBP,BRIP1,CRISP3,IGLV3-25,PGR,TMOD2,CORO1A,SCN1A,EXTL1,ABCG5,E2F…
GO:BP	gonad development	GO:0008406	0.000993979	3.00262	221	1068	34	KIF18A,FGF8,BRIP1,PGR,NOS3,WNT4,ASPM,SRY,COL9A3,NUDT1,LHCGR,DMRT1,RETN,CGA,NTRK1,RAD21L1,GATA4,AMH,TSPY4,TSPY8,AFP,BIK,LFNG,BMPR1B,GATA1,INHA,TEX11,ZP3,SPO11,LEP,NR5A1,RBMY1B,EREG,STAR
GO:BP	antimicrobial humoral response	GO:0019730	0.00105606	2.97631	126	1068	24	LTF,HTN3,PPBP,CXCL13,LCN2,H2BFS,PRTN3,REG1A,SEMG2,KLK7,SEMG1,PLA2G2A,CXCL3,ELANE,HIST1H2BJ,SFTPD,IGHA2,F2,CHGA,S100A8,CXCL5,PF4V1,BPI,S100A9
GO:BP	neutrophil migration	GO:1990266	0.0014045	2.85248	119	1068	23	PPBP,CXCL13,CXCR2,CCL2,CCL15,CCL19,PRTN3,CCL20,CCL17,BST1,CXCL3,XCL2,CAMK1D,EDN3,CCL4,CCL24,SYK,S100A8,CXCL5,PF4V1,CCL23,CCL22,S100A9
GO:BP	development of primary sexual characteristics	GO:0045137	0.00188432	2.72485	227	1068	34	KIF18A,FGF8,BRIP1,PGR,NOS3,WNT4,ASPM,SRY,COL9A3,NUDT1,LHCGR,DMRT1,RETN,CGA,NTRK1,RAD21L1,GATA4,AMH,TSPY4,TSPY8,AFP,BIK,LFNG,BMPR1B,GATA1,INHA,TEX11,ZP3,SPO11,LEP,NR5A1,RBMY1B,EREG,STAR
GO:BP	cell-cell signaling	GO:0007267	0.00212838	2.67195	1926	1068	165	RAPSN,GRIA2,PCDH8,PTH,IL18,NMU,JPH3,CCL27,PGR,TMOD2,FZD2,IL26,CXCL13,FGF20,DGKB,SLC4A10,FZD8,CCL2,STX11,ADCY8,CCL15,CCDC88C,HIC1,RIT2,BRSK2,VAMP8,CCAR2,SORCS3,SOSTDC1,SCEL,SLC4A8,PTPRS,CCL19,BARX1,WNT4,GPC5,S100B,PLP1,RUVBL1,ADRB1,LNPEP,ASPM,KCNA5,NLGN4Y,FOXD1,KCNN2,IFNA2,DRD1,NPVF,CCL20,IHH,CCL17,VIP,PCDHB3,DKKL1,PCSK1,ABCC8,IGFBP1,COLQ,NOX5,RETN,OR10H2,DRD4,CGA,LRRTM2,NTRK1,NRGN,CPLX2,WIF1,BMP3…
GO:BP	reproduction	GO:0000003	0.00239686	2.62036	1493	1068	134	ASCL2,KIF18A,FGF8,SCGB1A1,BRDT,ADAM2,BRIP1,PGR,E2F8,OR7C1,MAK,CRIP1,SPAG4,USP9Y,SPANXB1,NPPC,PGAM2,RPL39L,NOS3,WNT4,TIMP4,PTTG2,SEBOX,RUVBL1,TUBGCP5,EPYC,MORC1,TTLL1,LNPEP,FOSL1,INCENP,ASPM,EIF5A2,ALPL,MSH5,ATP8B3,NEUROG1,SRY,DRD1,PPARG,COL9A3,IHH,NPAS1,SPATA31A1,SPATA31A3,SPATA31A5,SPATA31A6,SPATA31A7,ABCC2,NUDT1,TAF7L,VIP,LHCGR,DKKL1,DMRT1,GNRH2,ABCC8,HOXD10,NOX5,RETN,SEMG2,CGA,TACR3,CDX4,NTRK1…
GO:BP	leukocyte migration	GO:0050900	0.00293118	2.53296	502	1068	58	MMP1,CCL27,VPREB1,PPBP,IGLV3-25,CORO1A,CXCL13,CXCR2,CCL2,TNFRSF10D,CCL15,CCL19,ITGB7,PRTN3,CCL20,CCL17,CEACAM8,IGKV2-28,IGKV2D-28,BST1,CXCL3,TNF,XCL2,CAMK1D,ELANE,ANGPT4,TNFRSF11A,PODXL2,IGKV1-17,IGKV4-1,MMP28,EDN3,CCL4,CCL24,SFTPD,IGHA2,SYK,AKT1,F2,SLC7A10,TRPM4,ZP3,PTPN22,CHGA,FFAR2,S100A8,CRTAM,CXCL5,PF4V1,LEP,BDKRB1,TNFSF14,ITGAX,CCL23,CCR5,CCL22,P2RX4,S100A9
GO:BP	sex differentiation	GO:0007548	0.00303696	2.51756	274	1068	38	KIF18A,FGF8,BRIP1,PGR,NOS3,WNT4,ASPM,NEUROG1,SRY,COL9A3,NUDT1,LHCGR,DMRT1,RETN,CGA,NTRK1,RAD21L1,GATA4,AMH,TSPY4,TSPY8,AFP,BIK,LFNG,BMPR1B,CDKL2,LHX1,GATA1,INHA,TEX11,ZP3,HOXD13,SPO11,LEP,NR5A1,RBMY1B,EREG,STAR
GO:BP	reproductive process	GO:0022414	0.00356013	2.44853	1490	1068	133	ASCL2,KIF18A,FGF8,SCGB1A1,BRDT,ADAM2,BRIP1,PGR,E2F8,OR7C1,MAK,CRIP1,SPAG4,USP9Y,SPANXB1,NPPC,PGAM2,RPL39L,NOS3,WNT4,TIMP4,PTTG2,SEBOX,RUVBL1,TUBGCP5,EPYC,MORC1,TTLL1,LNPEP,FOSL1,INCENP,ASPM,EIF5A2,ALPL,MSH5,ATP8B3,NEUROG1,SRY,DRD1,PPARG,COL9A3,IHH,NPAS1,SPATA31A1,SPATA31A3,SPATA31A5,SPATA31A6,SPATA31A7,ABCC2,NUDT1,TAF7L,VIP,LHCGR,DKKL1,DMRT1,ABCC8,HOXD10,NOX5,RETN,SEMG2,CGA,TACR3,CDX4,NTRK1,TEKT2…
GO:BP	regulation of biological quality	GO:0065008	0.00387381	2.41186	4100	1068	309	RAPSN,GRIA2,PCDH8,UBE2S,PCK1,SCGB1A1,TRIM58,TRPM1,PTH,TNNC1,GALR2,USP53,LTF,PLEKHO1,SLC12A1,POU3F3,ACOXL,G6PC,EXOSC1,RPE65,KCNK12,IL18,NMU,COMP,NFE2,JPH3,TNFRSF17,CYP4F11,ERAP2,TMOD2,CORO1A,SCN1A,ABCG5,APOC3,ZNF675,MAK,CALY,CXCL13,DGKB,SLC4A10,CXCR2,SLC9A2,CLDN1,CCL2,LCN2,STX11,NPPC,ADCY8,CCL15,CACNG2,HSD3B1,CCDC88C,TRPC5,TRDN,RIT2,BRSK2,RAG2,VAMP8,CCAR2,CYP2W1,SORCS3,TRIM46,HIST3H3,SLC4A8,PTPRS,…
GO:BP	cell population proliferation	GO:0008283	0.00420039	2.37671	2048	1068	172	ASCL2,POU1F1,SOX18,GBX2,FGF8,SCGB1A1,C8ORF44-SGK3,PTH,LTF,POU3F3,CRLF1,HHLA2,IL18,MZB1,COMP,EHF,CDKN2B,BRIP1,PGR,CORO1A,E2F8,IL26,FGF20,CXCR2,CLDN1,CCL2,NPPC,CD1D,TWSG1,TRPC5,RAG2,CCL19,NOS3,WNT4,S100B,IFNA8,NANOG,FOSL1,ASPM,EIF5A2,KCNA5,CGREF1,PRTN3,REG1A,CPB2,LTBP3,IFNA2,ALOX12,EMC10,PAK1,PPARG,IHH,INSM1,NKX2-8,VIP,SP1,AURKB,FBXO4,DMRT1,CDON,C1ORF56,CSF3,ABCC8,SOX5,NOX5,CGA,NTRK1,S100A11,FRK,CD…
GO:BP	digestive system process	GO:0022600	0.00442117	2.35446	100	1068	20	NMU,ABCG5,MUC4,IREB2,NEUROG1,FABP1,APOA2,EPB41,UCN,VIL1,NR1H2,APOA4,SCT,CEL,FABP2,GCNT3,LEP,APOA1,MUC13,SLC26A6
GO:BP	response to lipid	GO:0033993	0.00520657	2.28345	956	1068	93	KIF18A,PCK1,SCGB1A1,PTH,LTF,SCGB2A1,IL18,GRAMD1C,PPBP,PGR,CXCL13,CNGA3,MLC1,TIE1,CLDN1,CCL2,LCN2,ADCY8,LIAS,HSD3B1,SCGB2A2,CCL19,NOS3,TIMP4,TNIP3,BRINP3,S100B,NKX2-2,FOSL1,ALPL,ACTA1,ALOX12,LOXL1,PDK4,PAK1,PPARG,IHH,CYP7A1,ABCC2,CSF3,ABCC8,CSN1S1,TACR3,HSD11B2,CXCL3,IL24,AANAT,TNF,OSBPL7,GATA4,ELANE,ENDOG,GDAP1,TNFRSF11A,DSG1,LRAT,ANKRD1,IL12RB2,HOXA2,HTR5A,APOA2,FES,PTGFR,SSTR1,IGFBP2,CITED1,UCN…
GO:BP	granulocyte chemotaxis	GO:0071621	0.00724864	2.13974	121	1068	22	PPBP,CXCL13,CXCR2,CCL2,CCL15,CCL19,CCL20,CCL17,BST1,CXCL3,XCL2,CAMK1D,EDN3,CCL4,CCL24,SYK,S100A8,CXCL5,PF4V1,CCL23,CCL22,S100A9
GO:BP	lymphocyte proliferation	GO:0046651	0.00872142	2.05941	286	1068	38	SCGB1A1,HHLA2,IL18,MZB1,CORO1A,CD1D,TWSG1,RAG2,CCL19,WNT4,IFNA8,IFNA2,IHH,PKN1,IL5,PLA2G2A,BST1,PDE5A,FLT3LG,PRKCD,SFTPD,IGFBP2,SYK,CR2,IFNA6,IFNB1,ZP3,IFNW1,PTPN22,CRTAM,CLCF1,LEP,TNFSF14,CD40LG,TICAM1,IL7,IL2,MAD1L1
GO:BP	leukocyte chemotaxis	GO:0030595	0.00928463	2.03224	222	1068	32	CCL27,PPBP,CORO1A,CXCL13,CXCR2,CCL2,CCL15,CCL19,CCL20,CCL17,BST1,CXCL3,XCL2,CAMK1D,TNFRSF11A,MMP28,EDN3,CCL4,CCL24,SFTPD,SYK,TRPM4,CHGA,FFAR2,S100A8,CXCL5,PF4V1,TNFSF14,CCL23,CCR5,CCL22,S100A9
GO:BP	regulation of intestinal absorption	GO:1904478	0.00935724	2.02885	9	1068	6	ABCG5,APOA2,EPB41,APOA4,LEP,APOA1
GO:BP	mononuclear cell proliferation	GO:0032943	0.0112153	1.95019	289	1068	38	SCGB1A1,HHLA2,IL18,MZB1,CORO1A,CD1D,TWSG1,RAG2,CCL19,WNT4,IFNA8,IFNA2,IHH,PKN1,IL5,PLA2G2A,BST1,PDE5A,FLT3LG,PRKCD,SFTPD,IGFBP2,SYK,CR2,IFNA6,IFNB1,ZP3,IFNW1,PTPN22,CRTAM,CLCF1,LEP,TNFSF14,CD40LG,TICAM1,IL7,IL2,MAD1L1
GO:BP	regulation of cell population proliferation	GO:0042127	0.0155596	1.808	1760	1068	149	ASCL2,POU1F1,SOX18,FGF8,SCGB1A1,C8ORF44-SGK3,PTH,LTF,POU3F3,CRLF1,HHLA2,IL18,MZB1,COMP,CDKN2B,BRIP1,PGR,CORO1A,IL26,FGF20,CXCR2,CLDN1,CCL2,NPPC,CD1D,TWSG1,TRPC5,CCL19,NOS3,S100B,NANOG,FOSL1,ASPM,EIF5A2,KCNA5,CGREF1,PRTN3,REG1A,CPB2,LTBP3,ALOX12,EMC10,PAK1,PPARG,IHH,INSM1,NKX2-8,VIP,SP1,FBXO4,CDON,C1ORF56,CSF3,ABCC8,CGA,NTRK1,S100A11,FRK,CDK6,CHST11,PKN1,CLDN3,IL5,PLA2G2A,BST1,FEZF2,IL24,TNF,NUDT6…
GO:BP	positive regulation of cell population proliferation	GO:0008284	0.0162259	1.78979	969	1068	92	POU1F1,FGF8,PTH,LTF,POU3F3,CRLF1,HHLA2,IL18,MZB1,COMP,CORO1A,FGF20,CXCR2,CLDN1,CD1D,TRPC5,CCL19,S100B,NANOG,FOSL1,ASPM,EIF5A2,KCNA5,PRTN3,REG1A,LTBP3,ALOX12,EMC10,PAK1,IHH,INSM1,VIP,SP1,CDON,CSF3,CGA,CDK6,IL5,BST1,IL24,TNF,IL9,CDC20,ELANE,NTF3,TNFRSF11A,HPSE2,IL12RB2,DLX6,FLT3LG,PRAMEF10,GCNT2,CCR3,MAB21L1,EDN3,TGM1,PTGFR,PRAMEF12,CCL24,LHX1,IGFBP2,CITED1,SYK,AKT1,F2,GATA1,HPSE,NKX2-5,TRPM4,CAPN1…
GO:BP	cell-cell adhesion	GO:0098609	0.0163073	1.78762	876	1068	85	PCDH8,SCGB1A1,ICOS,HHLA2,IL18,COMP,CORO1A,CXCL13,CLDN1,CCL2,CD1D,TWSG1,PTPRS,CCL19,WNT4,ITGB7,CDH7,DSC1,EPHA7,NLGN4Y,CNTN6,IFNA2,ALOX12,PAK1,TMOD3,IHH,ALOX15,CDH17,CEACAM8,PCDHB3,CRISP2,KIF26B,CTNNA3,S100A11,CLDN14,GRID2,CLDN3,PLA2G2A,EMCN,LRFN4,TNF,CTNNA2,ITGA7,PDE5A,ELANE,DSG1,PODXL2,FAT2,GCNT2,PRKCD,CDH9,COL19A1,SFTPD,IGFBP2,CDC42EP1,NINJ2,TENM1,IL1RL2,SYK,AKT1,APOA4,GATA1,IFNB1,CEL,ZP3,CBLN1,…
GO:BP	response to organic cyclic compound	GO:0014070	0.0163512	1.78645	996	1068	94	KIF18A,PCK1,FGF8,SCGB1A1,PTH,SCGB2A1,G6PC,IL18,GRAMD1C,P2RY13,PGR,CALY,CNGA3,MLC1,CLDN1,CCL2,ADCY8,HSD3B1,SCGB2A2,S100B,NKX2-2,IFNA8,PRMT5,FOSL1,ALPL,REG1A,ACTA1,IFNA2,DRD1,PAK1,PPARG,IHH,CYP7A1,P2RY2,ABCC2,OR10H2,DRD4,CSN1S1,TACR3,HSD11B2,AANAT,TNF,OSBPL7,AQP9,DUOX2,ENDOG,AMH,GDAP1,DSG1,PDE12,ANKRD1,HTR1F,GABPA,HTR5A,G6PD,APOA2,FES,PTGFR,SSTR1,IGFBP2,CITED1,UCN,SST,NR1H2,AKT1,APOA4,DNTT,IFNA6,IF…
GO:BP	movement of cell or subcellular component	GO:0006928	0.0189291	1.72287	2275	1068	184	NRTN,MMP1,KIF18A,SOX18,GBX2,FGF8,TRIM58,C8ORF44-SGK3,TNNC1,PLEKHO1,POU3F3,CCL27,VPREB1,PPBP,IGLV3-25,CDK5R2,ZBBX,CORO1A,SCN1A,MAK,CXCL13,CXCR2,TIE1,CLDN1,USP9Y,CCL2,TNFRSF10D,CCL15,CCDC88C,FSCN2,CASS4,TRIM46,ELMO3,CCL19,NOS3,WNT4,GPC5,ITGB7,VTN,MYH6,TTLL1,SOX14,ASPM,KCNA5,PRTN3,EPHA7,NTN3,IFT22,SEMA3E,FOXD1,CNTN6,KCNN2,DLGAP5,ACTA1,DRD1,CCL20,ALOX12,EMC10,PAK1,CHL1,PPARG,INSM1,CCL17,CEACAM8,SP1,D…
GO:BP	lipid digestion	GO:0044241	0.0191214	1.71848	19	1068	8	ABCG5,PNLIPRP2,CLPS,APOA2,APOA4,CEL,LEP,APOA1
GO:BP	central nervous system development	GO:0007417	0.0221819	1.654	1044	1068	97	POU1F1,GBX2,FGF8,SNTG2,POU3F3,XAB2,ATG16L1,CDK5R2,SLC4A10,CXCR2,HSD3B1,TWSG1,NEUROG3,POU6F2,PTPRS,WNT4,TIMP4,S100B,VTN,NKX2-2,H2BFS,PRMT5,PLP1,TTLL1,ASPM,EPHA7,PITX1,CA10,CNTN6,SYNGR3,DRD1,PAK1,PPARG,NPAS1,RFX4,NIN,CDON,LSR,SLC6A11,HOXD10,CDK6,NRGN,ADCK4,GRID2,BBS7,CLDN3,FEZF2,TNF,CTNNA2,PHACTR1,DUOX2,MYO16,MAP1S,VAX2,TP73,NNAT,MAST1,CASP5,HOXA2,HOXB3,SLITRK5,HTR5A,FABP7,UGT8,G6PD,LHX1,SSTR1,CITE…
GO:BP	developmental process involved in reproduction	GO:0003006	0.022197	1.6537	990	1068	93	ASCL2,KIF18A,FGF8,BRDT,BRIP1,PGR,E2F8,OR7C1,MAK,CRIP1,SPAG4,USP9Y,SPANXB1,NPPC,PGAM2,RPL39L,NOS3,WNT4,SEBOX,RUVBL1,MORC1,TTLL1,FOSL1,ASPM,EIF5A2,ALPL,NEUROG1,SRY,PPARG,COL9A3,IHH,SPATA31A1,SPATA31A3,SPATA31A5,SPATA31A6,SPATA31A7,NUDT1,TAF7L,LHCGR,DMRT1,RETN,SEMG2,CGA,CDX4,NTRK1,SEMG1,RAD21L1,GATA4,PDE5A,AMH,TSPY4,TSPY8,AFP,BIK,LFNG,TNP2,PIWIL1,TSSK1B,BMPR1B,GAL3ST1,PRSS21,CDKL2,LHX1,SIX5,SSTR1,CI…
GO:BP	animal organ morphogenesis	GO:0009887	0.0305007	1.51569	1093	1068	100	SOX18,GBX2,FGF8,TRPM1,TNNC1,LTF,GNGT1,RPE65,COMP,MYF5,PGR,FZD2,CRIP1,SLC4A10,CCL2,NPPC,TWSG1,FSCN2,DMP1,SOSTDC1,COL9A1,NOS3,WNT4,HOXC8,MYH6,MMP20,ALPL,NTN3,MATN3,FOXD1,MMP13,CPB2,ACTA1,LTBP3,NEUROG1,USH2A,IHH,RAB23,TREH,TNFRSF11B,ASXL3,MBL2,CDON,KIF26B,HOXD10,PDE6C,CDX4,CHST11,BBS7,TNF,CTNNA2,DUOX2,POU4F3,VSX1,GATA4,SERPINH1,VAX2,ANKRD1,DSPP,HOXA2,HOXB3,DLX6,LFNG,BMPR1B,LAMA1,LHX1,IFT140,TCF15,CI…
GO:BP	leukocyte proliferation	GO:0070661	0.0306652	1.51335	313	1068	39	SCGB1A1,PTH,HHLA2,IL18,MZB1,CORO1A,CD1D,TWSG1,RAG2,CCL19,WNT4,IFNA8,IFNA2,IHH,PKN1,IL5,PLA2G2A,BST1,PDE5A,FLT3LG,PRKCD,SFTPD,IGFBP2,SYK,CR2,IFNA6,IFNB1,ZP3,IFNW1,PTPN22,CRTAM,CLCF1,LEP,TNFSF14,CD40LG,TICAM1,IL7,IL2,MAD1L1
GO:BP	cell surface receptor signaling pathway	GO:0007166	0.0308804	1.51032	3209	1068	245	POU1F1,NRTN,GRIA2,MMP1,FGF8,TRPM1,GALR2,LTF,COL4A4,CRLF1,RPE65,HHLA2,IL18,MZB1,COMP,ADAM2,TNFRSF17,CDKN2B,P2RY13,PPBP,IGLV3-25,CORO1A,ZNF675,FZD2,IL26,UBASH3A,CXCL13,FGF20,FZD8,CXCR2,TIE1,USP9Y,CCL2,LCN2,NPPC,TNFRSF10D,CCL15,CACNG2,TWSG1,CCDC88C,HIC1,PGAM2,CASS4,CCAR2,SOSTDC1,SCEL,CCL19,NOS3,BARX1,WNT4,TIMP4,GPC5,ITGB7,VTN,NKX2-2,IFNA8,PLP1,RUVBL1,AGR2,NANOG,LNPEP,KLRC1,ASPM,KCNA5,PRTN3,MARCO,EPH…
GO:BP	reproductive structure development	GO:0048608	0.0311374	1.50672	443	1068	50	ASCL2,KIF18A,FGF8,BRIP1,PGR,E2F8,CRIP1,NOS3,WNT4,FOSL1,ASPM,NEUROG1,SRY,PPARG,COL9A3,NUDT1,LHCGR,DMRT1,RETN,CGA,CDX4,NTRK1,RAD21L1,GATA4,AMH,TSPY4,TSPY8,AFP,BIK,LFNG,BMPR1B,LHX1,CITED1,AKT1,GATA1,INHA,TEX11,LIF,ZP3,HOXD13,SPO11,LEP,HEY2,NR5A1,KRT19,ETV2,GLI1,RBMY1B,EREG,STAR
GO:BP	granulocyte migration	GO:0097530	0.0325045	1.48806	142	1068	23	PPBP,CXCL13,CXCR2,CCL2,CCL15,CCL19,PRTN3,CCL20,CCL17,BST1,CXCL3,XCL2,CAMK1D,EDN3,CCL4,CCL24,SYK,S100A8,CXCL5,PF4V1,CCL23,CCL22,S100A9
GO:BP	biological adhesion	GO:0022610	0.0368868	1.43313	1460	1068	126	PCDH8,SCGB1A1,OLFM4,LTF,ICOS,HHLA2,IL18,COMP,ADAM2,MYF5,CORO1A,CXCL13,CLDN1,CCL2,CD1D,TWSG1,MSLN,CASS4,DMP1,PTPRS,CCL19,WNT4,ITGB7,CD72,VTN,AGR2,CDH7,DSC1,CGREF1,EPHA7,MUC4,NLGN4Y,NTM,SEMA3E,CNTN6,IFNA2,ALOX12,PAK1,CHL1,TMOD3,IHH,ALOX15,CDH17,CEACAM8,PCDHB3,CDON,CRISP2,KIF26B,CTNNA3,ONECUT1,S100A11,CDK6,CLDN14,GRID2,STAB2,CLDN3,PLA2G2A,EMCN,LRFN4,BST1,TNF,CTNNA2,ITGA7,IBSP,EMILIN2,PDE5A,ELANE,WIS…
GO:BP	reproductive system development	GO:0061458	0.0397808	1.40033	447	1068	50	ASCL2,KIF18A,FGF8,BRIP1,PGR,E2F8,CRIP1,NOS3,WNT4,FOSL1,ASPM,NEUROG1,SRY,PPARG,COL9A3,NUDT1,LHCGR,DMRT1,RETN,CGA,CDX4,NTRK1,RAD21L1,GATA4,AMH,TSPY4,TSPY8,AFP,BIK,LFNG,BMPR1B,LHX1,CITED1,AKT1,GATA1,INHA,TEX11,LIF,ZP3,HOXD13,SPO11,LEP,HEY2,NR5A1,KRT19,ETV2,GLI1,RBMY1B,EREG,STAR
GO:BP	regulation of intestinal cholesterol absorption	GO:0030300	0.0416425	1.38046	7	1068	5	ABCG5,APOA2,APOA4,LEP,APOA1
GO:BP	regulation of intestinal lipid absorption	GO:1904729	0.0416425	1.38046	7	1068	5	ABCG5,APOA2,APOA4,LEP,APOA1
GO:BP	extracellular structure organization	GO:0043062	0.0456895	1.34018	377	1068	44	MMP1,COL4A4,COMP,MYF5,TLL1,DMP1,COL9A1,ITGB7,VTN,MMP20,ANGPTL7,MATN3,MMP13,CPB2,LOXL1,COL9A3,IHH,TNFRSF11B,COLQ,PRSS1,KLK7,TNF,ITGA7,IBSP,ELANE,SERPINH1,HPSE2,DSPP,MMP28,LAMA1,COL19A1,NPHS1,TCF15,VWA1,ADAMTS20,CAPN1,COL17A1,ITGAX,TEX14,HAS1,RAMP2,MFI2,ETS1,MFAP4
GO:BP	cell adhesion	GO:0007155	0.0465004	1.33254	1453	1068	125	PCDH8,SCGB1A1,OLFM4,ICOS,HHLA2,IL18,COMP,ADAM2,MYF5,CORO1A,CXCL13,CLDN1,CCL2,CD1D,TWSG1,MSLN,CASS4,DMP1,PTPRS,CCL19,WNT4,ITGB7,CD72,VTN,AGR2,CDH7,DSC1,CGREF1,EPHA7,MUC4,NLGN4Y,NTM,SEMA3E,CNTN6,IFNA2,ALOX12,PAK1,CHL1,TMOD3,IHH,ALOX15,CDH17,CEACAM8,PCDHB3,CDON,CRISP2,KIF26B,CTNNA3,ONECUT1,S100A11,CDK6,CLDN14,GRID2,STAB2,CLDN3,PLA2G2A,EMCN,LRFN4,BST1,TNF,CTNNA2,ITGA7,IBSP,EMILIN2,PDE5A,ELANE,WISP2,D…
GO:BP	positive regulation of steroid metabolic process	GO:0045940	0.0476476	1.32196	27	1068	9	WNT4,CYP7A1,CGA,TNF,APOA2,APOA4,POR,APOA1,STAR
GO:CC	extracellular region	GO:0005576	1.40781e-08	7.85146	4574	1101	360	SLC5A12,NRTN,MMP1,PCK1,FGF8,SCGB1A1,PTH,PPP1R1A,OLFM4,SLC9A3R2,LTF,SCG3,IMPG1,ICOS,SLC12A1,HPR,COL4A4,SCGB2A1,CRLF1,KRT15,IL18,MZB1,HTN3,SI,NMU,COMP,ADAM2,CCL27,TLL1,VPREB1,PPBP,CRISP3,IGLV3-25,CORO1A,APOC3,IL26,UBASH3A,CXCL13,FGF20,IGKV1-37,IGKV1D-37,PGD,FKBP5,INSL6,CCL2,LCN2,CST1,NTS,NPPC,APOF,CCL15,MGAM,HSD3B1,CD1D,TWSG1,CD1C,PGAM2,MSLN,IMPG2,VAMP8,SCGB2A2,DMP1,SOSTDC1,HIST3H3,SCEL,PTPRS,CYTL1…
GO:CC	intrinsic component of plasma membrane	GO:0031226	2.45007e-08	7.61082	1696	1101	163	GRIA2,PCDH8,MFSD12,SLC14A1,TRPM1,GALR2,ICOS,SLC6A20,KCNK12,GPR25,MILR1,ADAM2,PRMT8,SCN1A,ABCG5,CALY,CXCR2,TIE1,CLDN1,ATP1B4,GYPE,ADCY8,CACNG2,CD1D,SLC16A4,CD1C,TRPC5,SORCS3,PTPRS,GPC5,ITGB7,GPR19,CD72,ADRB1,GPR6,LNPEP,KLRC1,KLRC2,SLC6A15,KCNA5,MARCO,EPHA7,MUC4,NLGN4Y,SEMA3E,CNTN6,TRHR,F2RL2,DRD1,NPBWR2,NPHS2,RHCG,P2RY2,TREH,ABCC2,SCN3A,LHCGR,PCDHB3,CDON,SLC6A11,ABCC8,SLCO1B1,NOX5,OR10H2,DRD4,LRRT…
GO:CC	integral component of plasma membrane	GO:0005887	3.46824e-07	6.45989	1619	1101	153	GRIA2,PCDH8,MFSD12,SLC14A1,TRPM1,GALR2,ICOS,SLC6A20,KCNK12,GPR25,MILR1,ADAM2,SCN1A,ABCG5,CALY,CXCR2,TIE1,CLDN1,ATP1B4,GYPE,ADCY8,CACNG2,CD1D,SLC16A4,CD1C,TRPC5,SORCS3,PTPRS,ITGB7,GPR19,CD72,ADRB1,GPR6,LNPEP,KLRC1,KLRC2,SLC6A15,KCNA5,MARCO,EPHA7,MUC4,NLGN4Y,SEMA3E,TRHR,F2RL2,DRD1,NPBWR2,NPHS2,RHCG,P2RY2,ABCC2,SCN3A,LHCGR,PCDHB3,CDON,SLC6A11,ABCC8,SLCO1B1,NOX5,OR10H2,DRD4,LRRTM2,LMTK2,TACR3,NTRK1,G…
GO:CC	extracellular space	GO:0005615	1.29649e-06	5.88723	3547	1101	283	SLC5A12,PCK1,SCGB1A1,PTH,PPP1R1A,OLFM4,SLC9A3R2,LTF,SLC12A1,HPR,COL4A4,SCGB2A1,CRLF1,KRT15,IL18,SI,COMP,CCL27,VPREB1,PPBP,CRISP3,IGLV3-25,CORO1A,APOC3,IL26,UBASH3A,CXCL13,IGKV1-37,PGD,FKBP5,CCL2,LCN2,CST1,NPPC,APOF,CCL15,MGAM,CD1D,TWSG1,CD1C,PGAM2,MSLN,VAMP8,SCGB2A2,SOSTDC1,HIST3H3,SCEL,PTPRS,CYTL1,CCL19,COL9A1,WNT4,TIMP4,GPC5,ITGB7,S100B,VTN,IFNA8,H2BFS,CYP4A22,RUVBL1,AGR2,C1ORF116,CLIC3,MMP20,G…
GO:CC	extracellular matrix	GO:0031012	1.0747e-05	4.96871	533	1101	64	MMP1,IMPG1,COL4A4,COMP,CRISP3,APOC3,IMPG2,DMP1,COL9A1,WNT4,TIMP4,GPC5,VTN,EPYC,MMP20,PRTN3,MARCO,ALPL,NTN3,MUC4,MATN3,MMP13,LTBP3,IFNA2,ITIH1,USH2A,LOXL1,COL9A3,IHH,TNFRSF11B,MBL2,PRG4,CDON,COLQ,PRSS1,EMILIN2,ELANE,F12,WISP2,SERPINH1,ZG16,HPSE2,DSPP,SBSPON,MMP28,LAMA1,COL19A1,ENTPD2,APOA4,VWA1,F2,ADAMTS20,HPSE,LRRN2,ZP3,CBLN1,COL17A1,S100A8,ZP2,IL7,PRG2,APOA1,S100A9,MFAP4
GO:CC	nuclear chromatin	GO:0000790	0.00125701	2.90066	1061	1101	98	ASCL2,POU1F1,THAP9,SOX18,GBX2,POU3F3,EHF,NFE2,MYF5,NEUROG2,PGR,SIM1,E2F8,POU2F3,NEUROG3,CCAR2,POU6F2,HIST3H3,BARX1,HOXC8,NKX2-2,RUVBL1,NANOG,SOX14,FOSL1,PITX1,FOXD1,NEUROG1,CHAF1B,SRY,PPARG,NPAS1,TLX2,LYL1,NKX2-8,RFX4,ASXL3,SP1,DMRT1,HOXD10,SOX5,MXD1,ONECUT1,CDX4,FOXD4,FOXD4L1,RFX1,POU4F3,VSX1,GATA4,ERF,VAX2,TP73,HOXA2,HOXB3,GABPA,DLX6,BATF,TNP2,FOXD3,LHX1,SIX5,CUX2,TCF15,NR1H2,ZBTB33,GATA1,DNTT,…
GO:CC	nuclear chromosome	GO:0000228	0.00173433	2.76087	1292	1101	114	ASCL2,POU1F1,THAP9,SOX18,GBX2,POU3F3,EHF,NFE2,MYF5,NEUROG2,PGR,SIM1,E2F8,POU2F3,NDC80,NEUROG3,CCAR2,POU6F2,HIST3H3,BARX1,HOXC8,NKX2-2,RUVBL1,NANOG,SOX14,FOSL1,INCENP,PITX1,MIS18BP1,FOXD1,MSH5,NABP1,NEUROG1,CHAF1B,SRY,PPARG,NPAS1,TLX2,LYL1,NKX2-8,RFX4,ASXL3,SP1,AURKB,DMRT1,HOXD10,SOX5,HIST1H2BB,MXD1,ONECUT1,CDX4,CDC45,NABP2,FOXD4,FOXD4L1,RFX1,POU4F3,RAD21L1,VSX1,GATA4,ERF,VAX2,TP73,HOXA2,HOXB3,GAB…
GO:CC	chromatin	GO:0000785	0.00398984	2.39905	1245	1101	109	ASCL2,POU1F1,SUV39H2,THAP9,SOX18,GBX2,POU3F3,EHF,NFE2,MYF5,NEUROG2,PGR,SIM1,E2F8,POU2F3,HIC1,NEUROG3,CCAR2,POU6F2,HIST3H3,BARX1,HOXC8,NKX2-2,H2BFS,RUVBL1,NANOG,SOX14,FOSL1,INCENP,PITX1,FOXD1,NEUROG1,CHAF1B,SRY,PPARG,NPAS1,TLX2,LYL1,NKX2-8,RFX4,ASXL3,SP1,DMRT1,HOXD10,SOX5,HIST1H2BB,MXD1,ONECUT1,CDX4,HIST1H2BN,FOXD4,FOXD4L1,RFX1,POU4F3,VSX1,GATA4,ERF,VAX2,TP73,HOXA2,HOXB3,GABPA,DLX6,BATF,TNP2,FOXD3…
GO:CC	collagen-containing extracellular matrix	GO:0062023	0.0043404	2.36247	406	1101	46	COL4A4,COMP,APOC3,IMPG2,COL9A1,GPC5,VTN,PRTN3,MARCO,NTN3,MATN3,LTBP3,IFNA2,ITIH1,USH2A,LOXL1,COL9A3,MBL2,PRG4,CDON,COLQ,PRSS1,EMILIN2,ELANE,F12,SERPINH1,ZG16,SBSPON,MMP28,LAMA1,COL19A1,ENTPD2,APOA4,VWA1,F2,ADAMTS20,ZP3,CBLN1,COL17A1,S100A8,ZP2,IL7,PRG2,APOA1,S100A9,MFAP4
GO:CC	muscle myosin complex	GO:0005859	0.0415796	1.38112	15	1101	6	MYH1,MYH6,MYH4,MYH3,MYL5,MYH2
KEGG	Cytokine-cytokine receptor interaction	KEGG:04060	2.47608e-09	8.60623	292	527	53	IL18,TNFRSF17,CCL27,PPBP,IL26,CXCL13,CXCR2,CCL2,TNFRSF10D,CCL15,CCL19,IFNA8,IL13RA2,IFNA2,CCL20,CCL17,TNFRSF11B,CSF3,BMP3,IL5,CXCL3,IL24,TNF,IL9,XCL2,NGF,AMH,TNFRSF11A,IL12RB2,IL25,BMPR1B,CCR3,CCL4,CCL24,IL1RL2,INHA,IFNA6,IFNB1,LIF,IFNW1,CLCF1,CXCL5,PF4V1,LEP,TNFSF14,CCL23,CRLF2,CD40LG,CCR5,CCL22,IL7,IL2,ACKR4
KEGG	Viral protein interaction with cytokine and cytokine receptor	KEGG:04061	1.05365e-07	6.9773	98	527	26	IL18,CCL27,PPBP,CXCL13,CXCR2,CCL2,TNFRSF10D,CCL15,CCL19,CCL20,CCL17,CXCL3,IL24,TNF,XCL2,CCR3,CCL4,CCL24,CXCL5,PF4V1,TNFSF14,CCL23,CCR5,CCL22,IL2,ACKR4
KEGG	Neuroactive ligand-receptor interaction	KEGG:04080	1.71847e-06	5.76486	338	527	52	GRIA2,PTH,GALR2,NMU,P2RY13,NTS,ADRB1,TRHR,F2RL2,DRD1,NPBWR2,P2RY2,VIP,LHCGR,GNRH2,DRD4,PRSS1,CGA,TACR3,GRID2,GCG,HCRTR1,GRIK4,HTR1F,HTR5A,EDN3,PTGFR,SSTR1,MLNR,F2RL3,UCN,GABRP,SST,NPY4R,F2,SCT,MTNR1B,PYY,P2RY10,HTR1E,P2RX3,TAAR5,CHRM2,GRIN2C,SCTR,LEP,BDKRB1,GRIN2D,ADRA1B,GLP2R,P2RX4,CALCB
KEGG	Fat digestion and absorption	KEGG:04975	0.00219485	2.6586	43	527	12	ABCG5,PNLIPRP2,MTTP,CLPS,FABP1,PLA2G2A,APOA4,DGAT1,CEL,FABP2,APOA1,LIPF
KEGG	IL-17 signaling pathway	KEGG:04657	0.00436325	2.36019	92	527	18	MMP1,CCL2,LCN2,FOSL1,MMP13,CCL20,CCL17,CSF3,IL5,CXCL3,TNF,IL25,FOSB,S100A8,CXCL5,MAPK4,S100A9,TRAF2
KEGG	Bile secretion	KEGG:04976	0.0113372	1.94549	90	527	17	UGT2B4,ABCG5,ATP1B4,ADCY8,UGT2A3,KCNN2,CYP7A1,ABCC2,SLCO1B1,AQP9,SCT,ABCC3,SCTR,SLC22A1,UGT2A1,UGT2A2,ABCB4

[truncated: 1 more sheets: 2K]
